# Supplementary material for: Glycoproteomic Analysis Reveals Aberrant Expression of Complement C9 and Fibronectin in the Plasma of Patients with Colorectal Cancer
Source: PubMed Central journal article supplement (PMC7564939; doi:10.3390/proteomes8030026), 2020-09-22
Supplement: proteomes-08-00026-s001.pdf [file proteomes-08-00026-s001.pdf]

## Supplementary Materials

Figure S1. Protein patterns from pooled crude plasma samples

Figure S2. Protein patterns from pooled WGA-bound plasma fraction

Figure S3. Protein patterns from pooled WGA-unbound plasma fraction

Figure S4. Total protein gels and immunoblots of C9 from crude plasma, WGA-bound plasma and WGA-unbound plasma fractions obtained from the study cohort.

Figure S5. Total protein gels and immunoblots of FN1 from crude plasma, WGA-bound plasma and WGA-unbound plasma fractions obtained from the study cohort.

Figure S6. Total protein gels and immunoblots of C9 and FN1 from individual samples in the study cohort.

Figure S7. Total protein gels and immunoblots of C9 and FN1 from individual samples in the validation cohort.

Table S1. List of the accepted peptides used in protein quantification.

Table S2. The 80 WGA-enriched plasma proteins selected for protein quantification.

Table S3. List of the 62 WGA-enriched plasma proteins containing at least 2 peptides and their fold change in non-metastatic and metastatic CRC patients compared to those of the healthy controls.

Table S4. N-linked glycosylated searched against 20 WGA-enriched glycoproteins of the pooled sample of healthy control, non-metastatic and metastatic CRC patient groups

Table S5. Glycated peptides searched against 20 WGA-enriched glycoproteins of the pooled sample of healthy control, non-metastatic and metastatic CRC patient groups

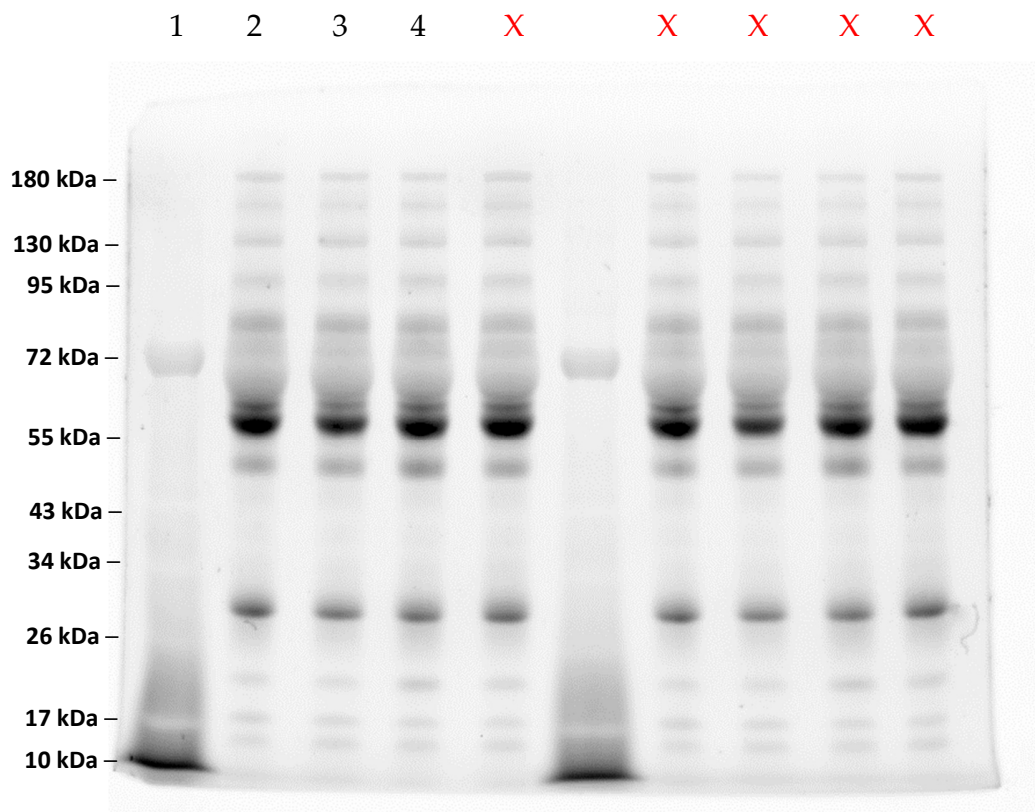

**Figure S1.** Protein patterns from pooled crude plasma samples

Lane 1: Pre-stained Protein Markers

Lane 2: Pooled crude plasma of healthy controls (10 µg)

Lane 3: Pooled crude plasma of non-metastatic CRC patients (10 µg)

Lane 4: Pooled crude plasma of metastatic CRC patients (10 µg)

**X** means protein bands from other conditions and authors focus only the proteins in three conditions (healthy controls, non-metastasis and metastasis CRC patients).

#### Densitometry analysis

| Pooled crude plasma samples                                      | Lane 2: Healthy control | Lane 3: Non-metastatic CRC | Lane 4: Metastatic CRC |
|------------------------------------------------------------------|-------------------------|----------------------------|------------------------|
| total protein intensity                                          | 11989295                | 11647984                   | 12549313               |
| Normalized total protein intensity (compared to healthy control) | 1.00                    | 0.97                       | 1.05                   |

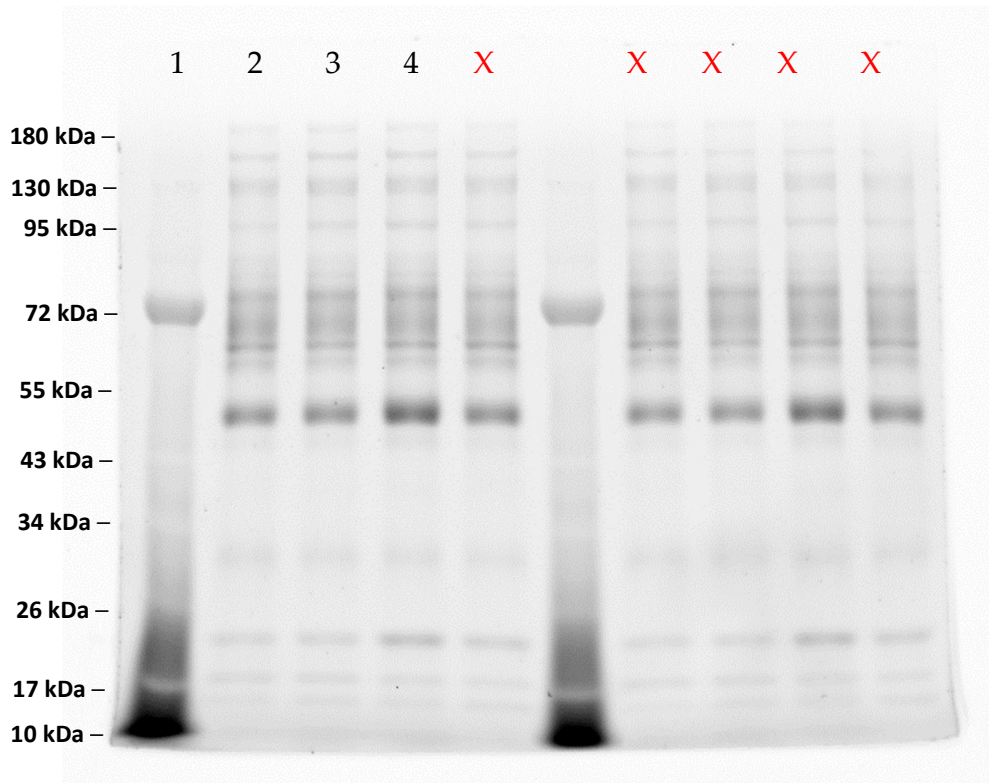

**Figure S2.** Protein patterns from pooled WGA-bound plasma fraction

Lane 1: Pre-stained Protein Markers

Lane 2: Pooled WGA-bound plasma fraction of healthy controls (5  $\mu$ g)

Lane 3: Pooled WGA-bound plasma fraction of CRC patients (5  $\mu$ g)

Lane 4: Pooled WGA-bound plasma fraction of metastatic CRC patients (5  $\mu$ g)

**X means protein bands from other conditions and authors focus only the proteins in three conditions (healthy controls, non-metastasis and metastasis CRC patients).**

### Densitometry analysis

| WGA-bound plasma fraction                                        | Lane 2: Healthy control | Lane 3: Non-metastatic CRC | Lane 4: Metastatic CRC |
|------------------------------------------------------------------|-------------------------|----------------------------|------------------------|
| total protein intensity                                          | 9386693                 | 8903096                    | 9999975                |
| Normalized total protein intensity (compared to healthy control) | 1.00                    | 0.95                       | 1.07                   |

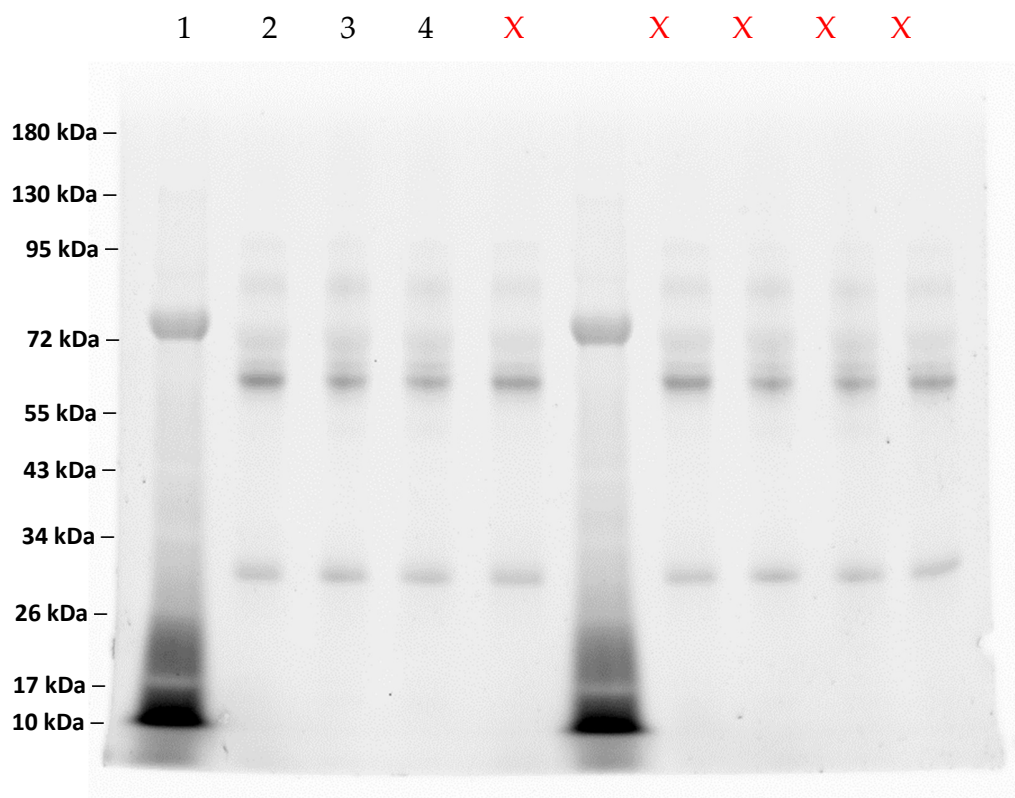

**Figure S3.** Protein patterns from pooled WGA-unbound plasma fraction

Lane 1: Pre-stained Protein Markers

Lane 2: Pooled WGA-unbound plasma fraction of healthy controls (5 µg)

Lane 3: Pooled WGA-unbound plasma fraction of CRC patients (5 µg)

Lane 4: Pooled WGA-unbound plasma fraction of metastatic CRC patients (5 µg)

**X means protein bands from other conditions and authors focus only the proteins in three conditions (healthy controls, non-metastasis and metastasis CRC patients).**

### Densitometry analysis

| WGA-unbound plasma fraction                                      | Lane 2: Healthy control | Lane 3: Non-metastatic CRC | Lane 4: Metastatic CRC |
|------------------------------------------------------------------|-------------------------|----------------------------|------------------------|
| total protein intensity                                          | 1925352                 | 1618552                    | 1588311                |
| Normalized total protein intensity (compared to healthy control) | 1.00                    | 0.84                       | 0.82                   |

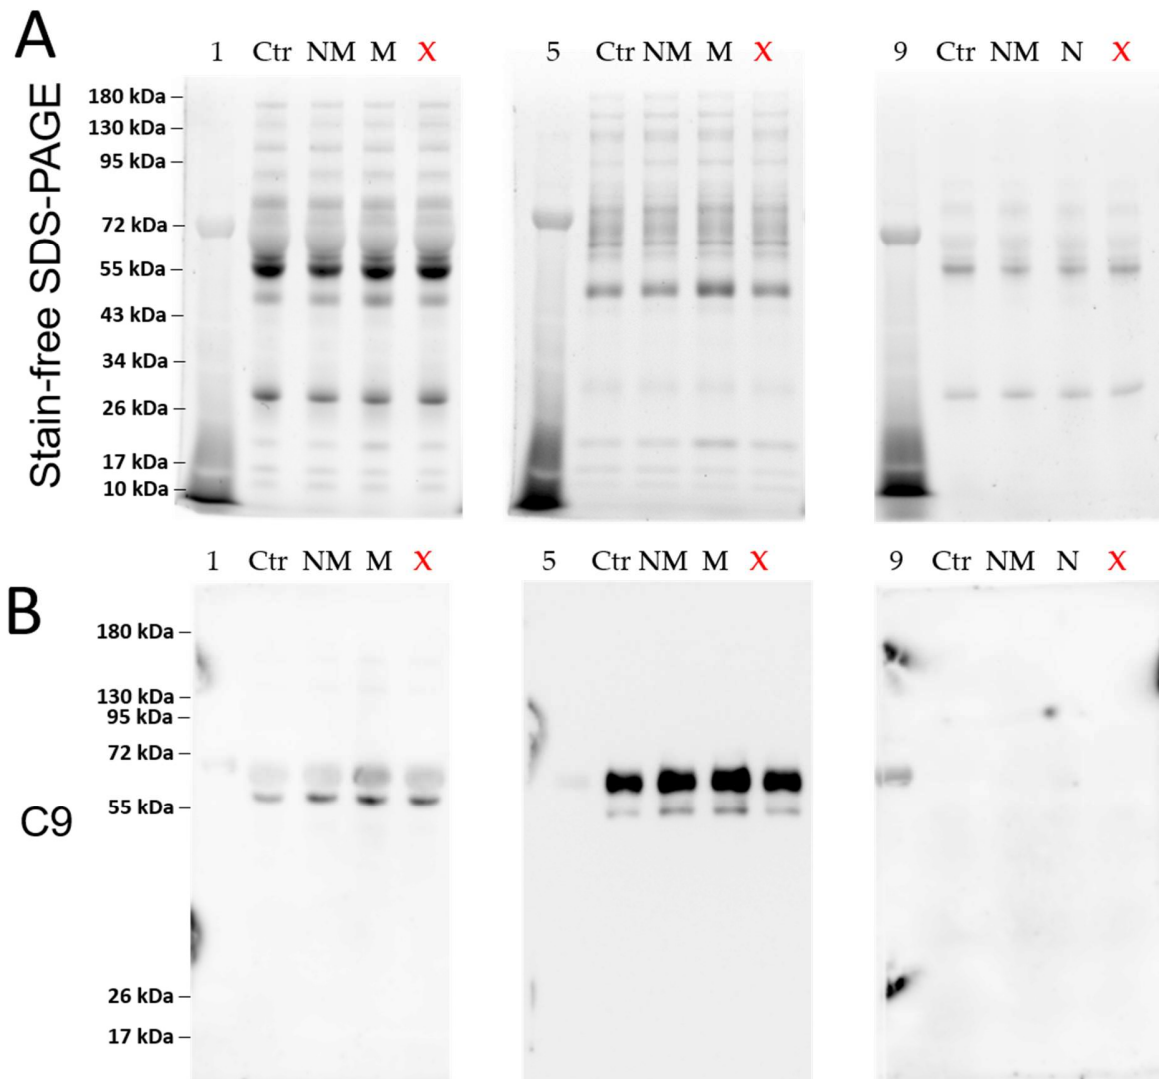

**Figure S4.** Total protein gels and immunoblots of C9 from crude plasma, WGA-bound plasma and WGA-unbound plasma fractions obtained from the study cohort. (A) Total protein gels performed by 10% stain-free SDS-PAGE. (B) Immunoblots of C9. Crude plasma (10  $\mu$ g), WGA-bound plasma fraction (5  $\mu$ g), and WGA-unbound plasma fraction (5  $\mu$ g) were from healthy control (Ctr), non-metastatic (NM) and metastatic CRC (M) patient groups, respectively. \*lane 1, 5, 9: Pre-stained Protein Markers, X means protein bands from other conditions and authors focus only the proteins in three conditions (healthy controls, non-metastasis and metastasis CRC patients).

## Densitometry analysis

|                                                      | Pooled crude plasma<br>(lane 2-4) |              |              | Pooled WGA-bound<br>plasma fraction<br>(lane 6-8) |              |              | Pooled WGA-unbound<br>plasma fraction<br>(lane 10-12) |             |             |
|------------------------------------------------------|-----------------------------------|--------------|--------------|---------------------------------------------------|--------------|--------------|-------------------------------------------------------|-------------|-------------|
|                                                      | Crt                               | NM-<br>CRC   | M-<br>CRC    | Crt                                               | NM-<br>CRC   | M-<br>CRC    | Crt                                                   | NM-<br>CRC  | M-<br>CRC   |
| total protein<br>intensity                           | 11989<br>295                      | 1164<br>7984 | 12549<br>313 | 93866<br>93                                       | 89030<br>96  | 9999<br>975  | 17370<br>37                                           | 1526<br>846 | 165249<br>7 |
| C9 intensity (up)                                    | 53268<br>8                        | 6011<br>53   | 13882<br>85  | 15989<br>954                                      | 22000<br>154 | 2851<br>8073 | ND                                                    | ND          | ND          |
| C9 intensity<br>(down)                               | 55415<br>3                        | 1126<br>339  | 14258<br>23  | 64345<br>4                                        | 18909<br>34  | 2147<br>486  | ND                                                    | ND          | ND          |
| C9 intensity<br>(up+down)                            | 10868<br>41                       | 1727<br>492  | 28141<br>08  | 16633<br>408                                      | 23891<br>088 | 3066<br>5559 | ND                                                    | ND          | ND          |
| C9/Total protein<br>intensity ratio                  | 0.09                              | 0.15         | 0.22         | 1.77                                              | 2.68         | 3.07         | -                                                     | -           | -           |
| Normalized ratio<br>(compared to<br>healthy control) | 1.00                              | 1.64         | 2.47         | 1.00                                              | 1.51         | 1.73         | -                                                     | -           | -           |

Note: Crt = Healthy controls, NM-CRC= non metastatic CRC patients, M-CRC= metastatic CRC patients, ND = indicated undetectable.

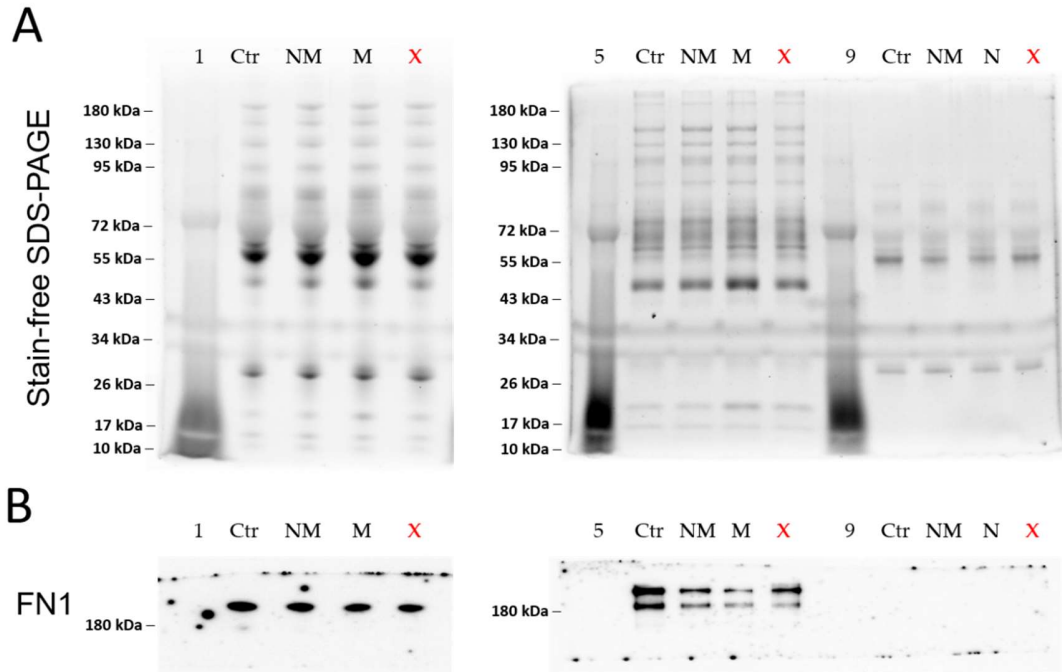

**Figure S5.** Total protein gels and immunoblots of FN1 from crude plasma, WGA-bound plasma and WGA-unbound plasma fractions obtained from the study cohort. (A) Total protein gels performed by 10% stain-free SDS-PAGE. (B) Immunoblots of C9. Crude plasma (10  $\mu$ g), WGA-bound plasma fraction (5  $\mu$ g), and WGA-unbound plasma fraction (5  $\mu$ g) were from healthy control (Ctr), non-metastatic (NM) and metastatic CRC (M) patient groups, respectively. \*lane 1, 5, 9: Pre-stained Protein Markers, **X means protein bands from other conditions and authors focus only the proteins in three conditions (healthy controls, non-metastasis and metastasis CRC patients).**

### Densitometry analysis

|                                                      | Pooled crude plasma<br>(lane 2-4) |              |              | Pooled WGA-bound<br>plasma fraction<br>(lane 6-8) |             |             | Pooled WGA-unbound<br>plasma fraction<br>(lane 10-12) |             |             |
|------------------------------------------------------|-----------------------------------|--------------|--------------|---------------------------------------------------|-------------|-------------|-------------------------------------------------------|-------------|-------------|
|                                                      | Crt                               | NM-<br>CRC   | M-<br>CRC    | Crt                                               | NM-<br>CRC  | M-<br>CRC   | Crt                                                   | NM-<br>CRC  | M-<br>CRC   |
| total protein<br>intensity                           | 82462<br>49                       | 1010<br>5944 | 11882<br>239 | 39960<br>26                                       | 38961<br>96 | 4648<br>245 | 15082<br>04                                           | 1337<br>398 | 134431<br>0 |
| FN1 intensity<br>(down)                              | 15556<br>380                      | 9810<br>423  | 64560<br>55  | 23743<br>950                                      | 92443<br>36 | 5041<br>287 | ND                                                    | ND          | ND          |
| FN1/Total protein<br>intensity ratio                 | 1.89                              | 0.97         | 0.54         | 5.94                                              | 2.37        | 1.08        | -                                                     | -           | -           |
| Normalized ratio<br>(compared to<br>healthy control) | 1.00                              | 0.51         | 0.29         | 1.00                                              | 0.40        | 0.18        | -                                                     | -           | -           |

Note: Crt = Healthy controls, NM-CRC= non metastatic CRC patients, M-CRC= metastatic CRC patients

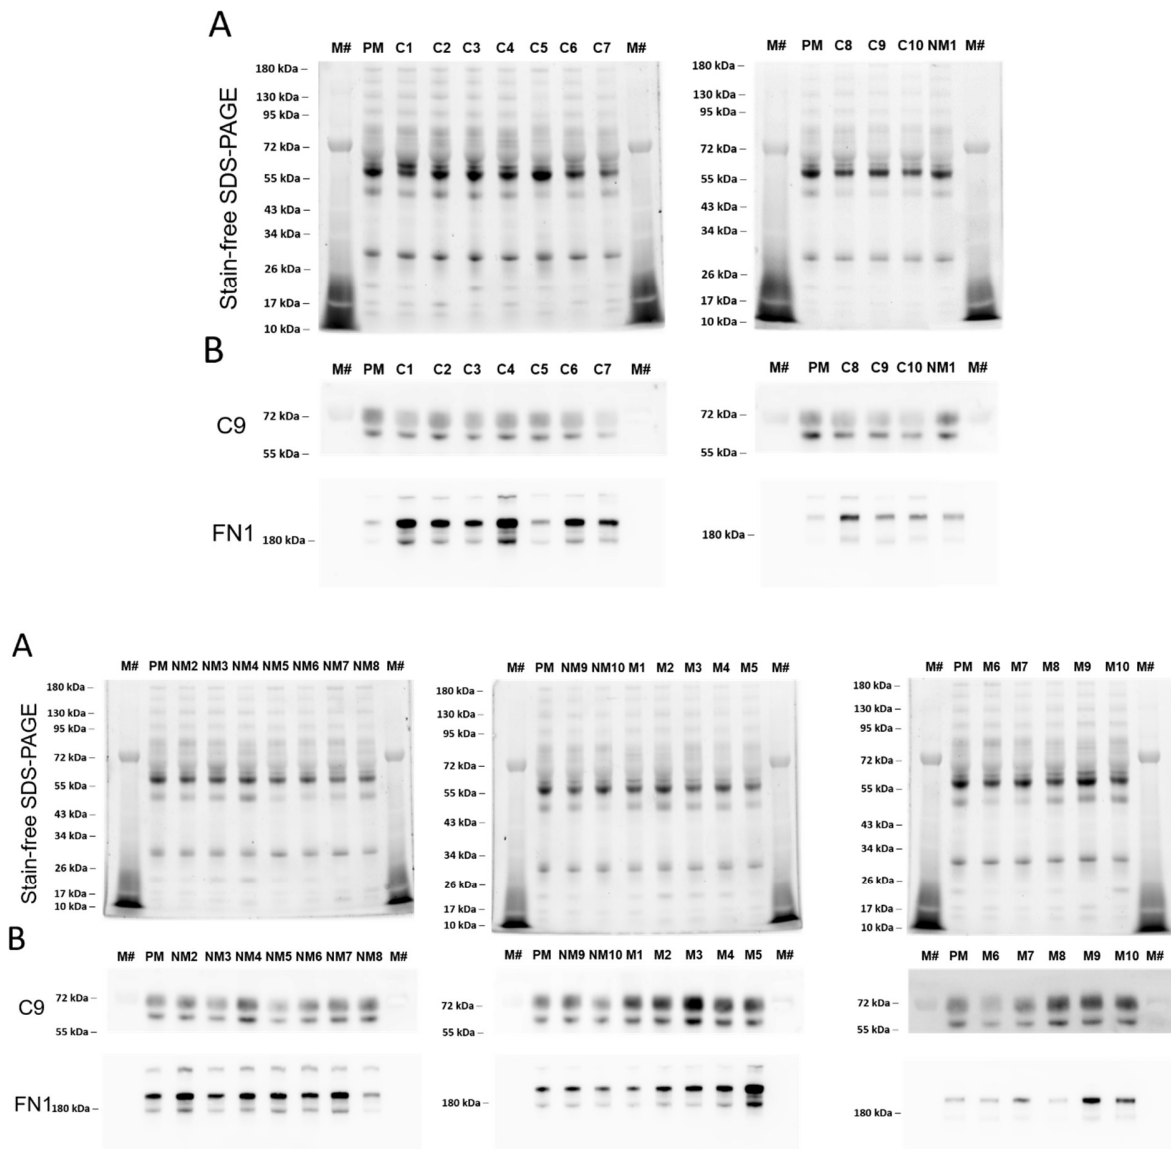

**Figure S6.** Total protein gels and immunoblots of C9 and FN1 from individual samples in the study cohort. (A) Total protein gels performed by 10% stain-free SDS-PAGE. (B) Immunoblots of C9 and FN1. Healthy controls (C1-C10), non-metastatic CRC patients (NM1-NM10), metastatic CRC patients (M1-M10), PM = a pooled plasma sample for protein normalization of each gel and immunoblot. M# = protein standard marker. Crude plasma samples (10 ug) were loaded in each lane.



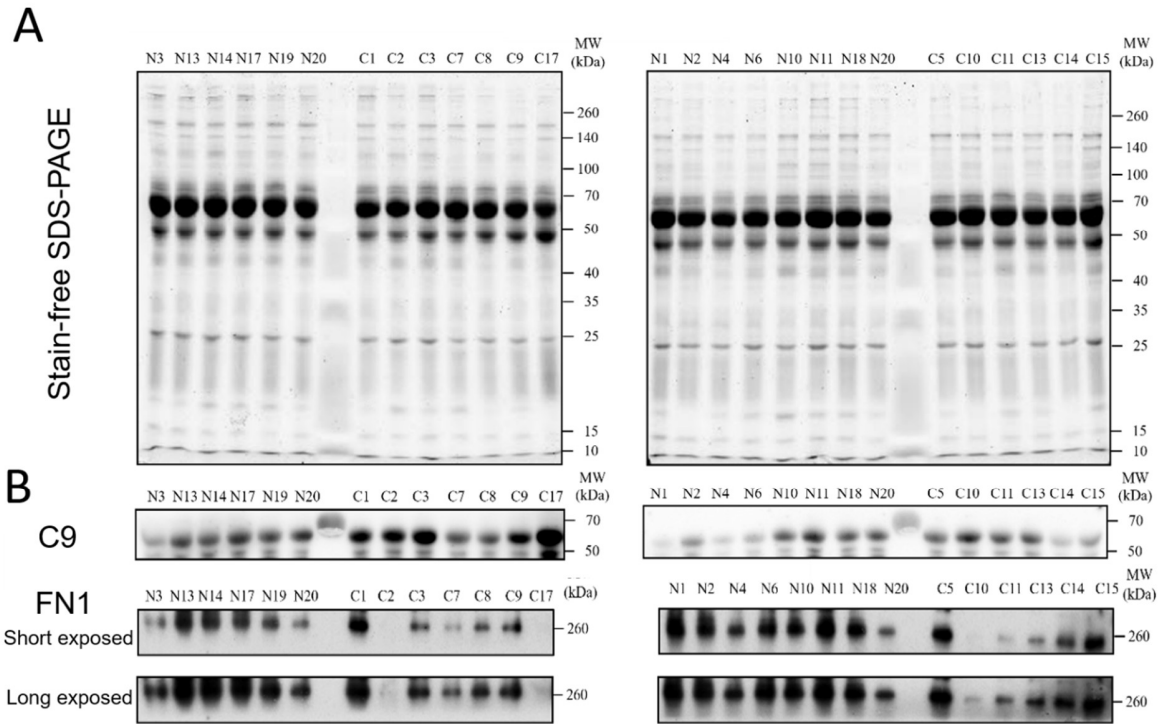

**Figure S7.** Total protein gels and immunoblots of C9 and FN1 from individual samples in the validation cohort. (A) Total protein gels performed by 10% stain-free SDS-PAGE. (B) Immunoblots of C9 and FN1. Healthy controls (N1, N13, N14, N17, N19, N20, N1, N2, N4, N6, N10, N11, and N18), non-metastatic CRC patients (C5, C10, C11, C13, C14, and C15) metastatic CRC patients (C1, C2, C3, C7, C8, C9, and C17), N20 = a plasma sample for protein normalization of each gel and immunoblot. Crude serum samples (10 ug) were loaded in each lane.

**Supplementary Table S1. List of the accepted peptides used in protein quantification**

| #    | Charge | m/z     | Measured mass | Score | Sequence            | Accession | Anova    | Normalized MS peak intensities |          |          |                    |          |            |                |          |          |
|------|--------|---------|---------------|-------|---------------------|-----------|----------|--------------------------------|----------|----------|--------------------|----------|------------|----------------|----------|----------|
|      |        |         |               |       |                     |           |          | Healthy control                |          |          | Non-metastatic CRC |          |            | Metastatic CRC |          |          |
|      |        |         |               |       |                     |           |          | Ctrl1                          | Ctrl2    | Ctrl3    | NM1                | NM2      | NM3        | M1             | M2       | M3       |
|      |        |         |               |       |                     |           |          | 7538                           | 2        | 492.723  | 983.432            | 12.71    | FSGSSSGAER | sp A0A075      | 0.000162 | 3865.8   |
| 1399 | 3      | 583.243 | 1746.707      | 17.06 | CSGEEQSLEQCQHR      | sp O43866 | 0.004865 | 18313.9                        | 18285.8  | 17976.4  | 17704.9            | 14522.5  | 16048.8    | 23182.9        | 20031.6  | 20305.1  |
| 1482 | 2      | 574.281 | 1146.547      | 8.01  | LVGGDNLCSGR         | sp O43866 | 0.003399 | 15880.9                        | 15737.9  | 15806.1  | 14516.5            | 15134.0  | 12674.3    | 11564.3        | 10985.7  | 10848.8  |
| 2728 | 2      | 496.295 | 990.576       | 3.58  | LTPPLYVGK           | sp O75460 | 1.39E-06 | 3976.7                         | 3074.3   | 3786.1   | 5531.1             | 5140.3   | 6221.3     | 2023.1         | 1793.4   | 1786.1   |
| 3309 | 3      | 349.514 | 1045.521      | 7.14  | YAVSEAAAHK          | sp O75636 | 5.70E-06 | 2824.1                         | 2411.9   | 2897.9   | 3012.4             | 2862.3   | 2992.2     | 1509.5         | 1471.0   | 1675.6   |
| 8547 | 3      | 512.218 | 1533.632      | 10.07 | CNGHASLCNTNTGK      | sp O75882 | 0.008709 | 1732.8                         | 1516.0   | 1840.8   | 1394.5             | 1393.1   | 1417.8     | 1787.1         | 1726.6   | 1967.3   |
| 157  | 2      | 735.868 | 1469.720      | 16.06 | EVGPTNADPVLAK       | sp P00450 | 0.006089 | 147701.7                       | 176880.2 | 176178.2 | 211575.5           | 271772.2 | 196592.2   | 283706.6       | 239971.9 | 296675.0 |
| 193  | 2      | 686.386 | 1370.758      | 15.06 | GAYPLSIEPIGVR       | sp P00450 | 0.015124 | 96273.4                        | 79784.7  | 113265.2 | 129964.5           | 172923.8 | 127779.5   | 116685.8       | 124635.5 | 126566.0 |
| 294  | 4      | 648.281 | 2589.097      | 11.02 | TYCSEPEKVDKDNEDFQI  | sp P00450 | 3.00E-06 | 157220.4                       | 174267.9 | 154744.7 | 180311.1           | 199722.4 | 177611.1   | 100278.1       | 100032.8 | 101846.5 |
| 350  | 2      | 760.376 | 1518.738      | 15.06 | ALYLQYTDETFR        | sp P00450 | 0.00015  | 69626.0                        | 66417.7  | 73291.6  | 105373.1           | 123060.6 | 105837.2   | 94260.9        | 81669.4  | 75469.7  |
| 373  | 3      | 844.421 | 2530.240      | 11.84 | SVPPSASHVAPTETFTYE  | sp P00450 | 0.000321 | 220695.2                       | 272040.2 | 236530.3 | 296223.1           | 311579.0 | 306225.9   | 383860.7       | 392368.5 | 334768.2 |
| 398  | 2      | 470.719 | 939.424       | 7.10  | YTVNQCR             | sp P00450 | 0.000258 | 30616.7                        | 29932.2  | 27334.6  | 34449.8            | 32927.6  | 38182.1    | 40756.4        | 45736.8  | 43095.0  |
| 407  | 3      | 638.050 | 1911.128      | 11.80 | TTIEKPVWLGFGLPIIK   | sp P00450 | 0.000647 | 83160.8                        | 91507.1  | 89746.7  | 120084.1           | 145365.1 | 112004.2   | 100140.3       | 95275.1  | 93275.2  |
| 410  | 4      | 340.688 | 1358.722      | 5.99  | AETGDKVYVHLK        | sp P00450 | 3.99E-05 | 22945.2                        | 25812.2  | 23731.7  | 29708.0            | 31926.8  | 30549.7    | 36147.4        | 37955.8  | 34096.3  |
| 447  | 4      | 854.929 | 3415.688      | 9.97  | QKDVDKEFYLFPTVFDEN  | sp P00450 | 0.031199 | 133433.4                       | 123528.5 | 140156.7 | 195928.8           | 144974.8 | 177206.0   | 153536.5       | 169442.5 | 160313.4 |
| 484  | 3      | 835.714 | 2504.120      | 16.38 | SGAGTEDSACIPWAYYS   | sp P00450 | 0.000533 | 139022.6                       | 105574.3 | 131372.7 | 177268.2           | 145654.4 | 152480.8   | 97214.3        | 96334.8  | 96827.1  |
| 637  | 3      | 533.271 | 1596.792      | 9.55  | QYTDSTFRVPVER       | sp P00450 | 7.83E-05 | 25486.7                        | 21045.1  | 25455.4  | 30265.0            | 37575.6  | 28713.4    | 53610.8        | 64169.5  | 70174.6  |
| 691  | 2      | 735.425 | 1468.836      | 18.06 | DIASGLIGPLICK       | sp P00450 | 6.19E-05 | 66263.8                        | 63465.9  | 61794.4  | 88191.1            | 78887.0  | 88595.3    | 51980.3        | 55910.9  | 47432.3  |
| 750  | 3      | 724.364 | 2170.069      | 15.90 | LISVDTEHSNIYLQNGPDF | sp P00450 | 0.000406 | 52215.3                        | 46280.0  | 51807.4  | 64651.6            | 77047.7  | 64034.2    | 49974.8        | 45566.8  | 52766.2  |
| 753  | 4      | 295.909 | 1179.606      | 3.15  | IYHSHIDAPK          | sp P00450 | 0.006808 | 9985.3                         | 9309.0   | 10519.9  | 11553.1            | 11239.3  | 12403.4    | 11912.4        | 11564.8  | 12368.9  |
| 819  | 3      | 522.915 | 1565.723      | 6.17  | VNKDDEEFIESNK       | sp P00450 | 3.03E-06 | 29072.2                        | 35965.5  | 28838.0  | 44228.3            | 35795.4  | 46224.6    | 9892.4         | 10467.1  | 12359.2  |
| 822  | 2      | 509.236 | 1016.458      | 7.34  | QYTDSTFR            | sp P00450 | 5.16E-07 | 19179.5                        | 18949.8  | 19595.5  | 26277.6            | 29361.5  | 25477.0    | 11644.5        | 11248.3  | 11287.7  |
| 856  | 3      | 825.361 | 2473.062      | 18.70 | MFTTAPDQVDKEDDFQ    | sp P00450 | 0.001325 | 49597.0                        | 58283.6  | 55872.4  | 85384.5            | 120324.5 | 84651.3    | 59263.1        | 51575.7  | 76608.3  |
| 863  | 4      | 575.549 | 2298.165      | 10.18 | MYSAVDPTKDIFTGLIGF  | sp P00450 | 6.62E-07 | 25660.0                        | 26017.8  | 27318.9  | 34876.3            | 33792.2  | 35803.6    | 48007.6        | 48121.3  | 44880.8  |
| 871  | 4      | 600.282 | 2397.097      | 12.95 | HYYIGIETTWDYASDHGF  | sp P00450 | 0.027927 | 39819.7                        | 30630.9  | 30192.0  | 49102.2            | 37498.3  | 44143.7    | 45519.9        | 48464.0  | 41141.5  |
| 875  | 6      | 414.728 | 2482.323      | 6.97  | KAEEEHLGILGPQLHADV  | sp P00450 | 0.003815 | 19493.7                        | 24680.9  | 17533.2  | 25684.5            | 26145.6  | 23327.7    | 33486.9        | 29616.0  | 41838.0  |
| 922  | 4      | 693.865 | 2771.431      | 8.29  | ERGPEEEHLGILGPVIWA  | sp P00450 | 1.94E-05 | 68007.4                        | 61992.5  | 66923.0  | 97181.1            | 96469.9  | 94140.4    | 95941.4        | 93307.7  | 82893.5  |

|      |   |          |          |       |                     |           |          |         |         |         |          |         |          |          |          |          |
|------|---|----------|----------|-------|---------------------|-----------|----------|---------|---------|---------|----------|---------|----------|----------|----------|----------|
| 923  | 3 | 444.546  | 1330.617 | 3.89  | EYTDASFTNRK         | sp P00450 | 0.00018  | 14523.5 | 14001.5 | 14112.8 | 19123.1  | 19757.1 | 18915.7  | 17421.4  | 14698.6  | 15953.0  |
| 964  | 2 | 602.269  | 1202.523 | 15.02 | EYTDASFTNR          | sp P00450 | 3.02E-06 | 19880.9 | 18695.5 | 21366.5 | 29239.5  | 27390.7 | 27678.6  | 14256.5  | 14266.1  | 15950.5  |
| 1083 | 5 | 431.821  | 2154.068 | 2.44  | NLASRPYTFHSHGITYYK  | sp P00450 | 0.000145 | 20035.4 | 21083.5 | 20804.2 | 25223.0  | 26638.7 | 24898.7  | 15184.7  | 15174.0  | 18514.6  |
| 1086 | 3 | 765.015  | 2292.022 | 12.70 | FNKNNEGTYSPNYPNQ    | sp P00450 | 2.94E-08 | 30619.1 | 31062.6 | 27607.3 | 38812.6  | 43767.3 | 40736.0  | 120189.0 | 111182.1 | 118612.4 |
| 1098 | 2 | 788.433  | 1574.852 | 18.06 | DLYSGLIGPLIVCR      | sp P00450 | 2.46E-05 | 55703.4 | 45286.7 | 59484.6 | 88304.4  | 84971.5 | 89185.2  | 40123.0  | 44836.3  | 43502.5  |
| 1150 | 2 | 716.323  | 1430.632 | 17.11 | QSEDSTFYLGGER       | sp P00450 | 0.016738 | 29326.7 | 38321.2 | 31388.8 | 38161.4  | 33346.5 | 35234.9  | 35124.5  | 28373.1  | 30113.8  |
| 1159 | 3 | 635.279  | 1902.816 | 12.16 | NNEGTYSPNYPNQRS     | sp P00450 | 0.003528 | 31857.9 | 31043.2 | 29109.2 | 38160.7  | 33345.2 | 36725.8  | 40012.5  | 35330.9  | 37387.9  |
| 1168 | 3 | 829.768  | 2486.283 | 16.17 | GPEEEHLGILGPVIWAEV  | sp P00450 | 0.004874 | 85554.2 | 97111.6 | 80692.4 | 109733.1 | 91958.7 | 116340.0 | 78181.1  | 82718.1  | 76589.9  |
| 1251 | 4 | 631.793  | 2523.143 | 10.56 | TYSDHPEKVNKDDEEFIE  | sp P00450 | 2.73E-05 | 36293.9 | 53661.6 | 36566.3 | 47570.1  | 51896.0 | 49244.7  | 13351.2  | 16132.2  | 16598.8  |
| 1326 | 4 | 607.272  | 2425.061 | 7.64  | MFTTAPDQVDKEDDFQ    | sp P00450 | 0.000921 | 26875.2 | 22967.6 | 26741.3 | 30872.0  | 45802.8 | 34276.1  | 20025.2  | 21129.8  | 23555.1  |
| 1352 | 3 | 525.958  | 1574.852 | 15.27 | DLYSGLIGPLIVCR      | sp P00450 | 4.92E-05 | 25272.5 | 20610.9 | 27344.9 | 37281.6  | 34922.6 | 36791.8  | 18420.0  | 20155.2  | 19493.0  |
| 1408 | 3 | 529.919  | 1586.736 | 4.08  | RQSEDSTFYLGGER      | sp P00450 | 0.000779 | 14729.7 | 15928.3 | 15376.5 | 19670.4  | 24154.6 | 19977.9  | 17593.3  | 17822.6  | 18414.2  |
| 1416 | 5 | 505.636  | 2523.144 | 3.75  | TYSDHPEKVNKDDEEFIE  | sp P00450 | 1.03E-05 | 22412.3 | 29704.9 | 25636.0 | 32981.1  | 27859.4 | 32166.7  | 9811.8   | 10414.9  | 11992.0  |
| 1422 | 3 | 507.254  | 1518.739 | 9.23  | ALYLQYTDETFR        | sp P00450 | 4.18E-05 | 9792.0  | 8826.8  | 10752.5 | 15711.1  | 14962.3 | 14730.2  | 12970.0  | 12196.1  | 11563.4  |
| 1437 | 4 | 563.547  | 2250.161 | 8.52  | MYSAVDPTKDIFTGLIGF  | sp P00450 | 0.004708 | 23708.7 | 25990.0 | 23327.0 | 24747.5  | 27160.7 | 27302.5  | 37080.8  | 39835.9  | 27136.3  |
| 1446 | 4 | 575.548  | 2298.164 | 7.92  | KLISVDTEHSNIYLQNGPI | sp P00450 | 0.035185 | 16377.0 | 22800.1 | 20016.9 | 20562.9  | 21250.4 | 19323.3  | 24591.3  | 20706.6  | 24300.8  |
| 1447 | 3 | 490.619  | 1468.836 | 15.27 | DIASGLIGPLIICK      | sp P00450 | 2.31E-05 | 17477.3 | 16596.0 | 17081.4 | 23750.2  | 20834.2 | 23295.3  | 13537.5  | 15354.5  | 13482.6  |
| 1497 | 4 | 539.524  | 2154.067 | 3.39  | NLASRPYTFHSHGITYYK  | sp P00450 | 0.010603 | 18490.9 | 24459.7 | 18661.9 | 20372.4  | 30845.7 | 22696.7  | 11992.7  | 12095.4  | 16640.8  |
| 1665 | 4 | 632.305  | 2525.192 | 11.16 | HYYIGIETTWDYASDHGF  | sp P00450 | 0.002816 | 22121.9 | 23505.9 | 23825.8 | 32858.3  | 47649.3 | 31828.6  | 24525.3  | 26697.8  | 21431.3  |
| 1726 | 3 | 800.039  | 2397.095 | 19.96 | HYYIGIETTWDYASDHGF  | sp P00450 | 0.021721 | 35153.9 | 27231.3 | 26748.1 | 41470.4  | 32415.6 | 38866.1  | 40218.2  | 40688.2  | 33157.6  |
| 1732 | 3 | 457.927  | 1370.759 | 9.20  | GAYPLSIEPIGVR       | sp P00450 | 0.004751 | 6055.0  | 5633.4  | 6809.1  | 7708.6   | 10293.5 | 8366.3   | 7756.0   | 9303.2   | 7879.6   |
| 1759 | 5 | 561.678  | 2803.353 | 1.46  | WYLFMGNEVDVHAAFF    | sp P00450 | 0.000141 | 17365.2 | 14478.3 | 18577.0 | 24661.6  | 23788.3 | 22213.1  | 14612.1  | 13787.7  | 14147.1  |
| 1776 | 5 | 506.046  | 2525.192 | 10.33 | HYYIGIETTWDYASDHGF  | sp P00450 | 0.001982 | 15122.1 | 17045.9 | 17031.9 | 23529.5  | 28081.6 | 23964.8  | 17996.1  | 20169.2  | 16766.3  |
| 1802 | 4 | 564.797  | 2255.160 | 16.96 | KAEEEHLGILGPQLHADV  | sp P00450 | 0.023705 | 15478.3 | 23123.4 | 16057.7 | 20171.3  | 39811.7 | 21623.2  | 11053.8  | 10836.0  | 15114.1  |
| 1896 | 3 | 326.151  | 975.432  | 6.50  | TYSDHPEK            | sp P00450 | 0.003735 | 7400.9  | 6157.0  | 7482.4  | 11964.7  | 8640.1  | 11481.9  | 2524.6   | 4554.9   | 3351.8   |
| 2001 | 3 | 533.317  | 1596.930 | 11.69 | DIASGLIGPLIICK      | sp P00450 | 2.07E-06 | 10192.7 | 7485.4  | 9238.5  | 9634.0   | 8869.3  | 10655.2  | 35670.1  | 33911.0  | 29537.6  |
| 2235 | 3 | 1133.893 | 3398.657 | 17.76 | QKDVDKEFYLFPTVFDEN  | sp P00450 | 0.001503 | 32268.1 | 32642.6 | 27144.6 | 54968.3  | 45798.9 | 45636.7  | 62277.9  | 46435.7  | 49322.1  |
| 2311 | 3 | 864.039  | 2589.095 | 16.88 | TYCSEPEKVDKDNEDFQI  | sp P00450 | 1.99E-05 | 23821.0 | 24413.9 | 19613.6 | 31417.5  | 37033.6 | 35641.1  | 13412.5  | 12440.9  | 10499.7  |
| 2313 | 3 | 905.456  | 2713.346 | 18.17 | HYYIAAEEIWNYPAPSGID | sp P00450 | 3.46E-08 | 35394.7 | 37073.0 | 38415.3 | 78517.4  | 58391.9 | 74426.3  | 9385.0   | 9315.0   | 8460.2   |
| 2341 | 5 | 775.392  | 3871.925 | 11.99 | NMATRPYSIHAHGVQTE   | sp P00450 | 0.000122 | 16220.5 | 16614.2 | 18867.3 | 30668.5  | 40787.7 | 32063.5  | 34986.5  | 35399.5  | 30530.4  |
| 2352 | 3 | 1054.184 | 3159.532 | 18.52 | DVDKEFYLFPTVFDENES  | sp P00450 | 3.78E-06 | 25069.5 | 24647.2 | 26655.6 | 44632.3  | 41730.7 | 41577.2  | 36821.5  | 35511.4  | 31279.8  |
| 2427 | 5 | 452.039  | 2255.159 | 7.16  | KAEEEHLGILGPQLHADV  | sp P00450 | 0.000756 | 6831.8  | 8871.9  | 8232.2  | 11291.7  | 15282.4 | 10625.7  | 5916.3   | 4647.2   | 6968.6   |
| 2553 | 3 | 890.426  | 2668.255 | 20.38 | GVYSSDVFDFIPGTQYL   | sp P00450 | 4.10E-05 | 12660.4 | 9777.6  | 12690.2 | 30141.7  | 23664.8 | 27360.4  | 17775.1  | 17499.0  | 17402.7  |
| 2595 | 4 | 575.794  | 2299.149 | 3.43  | KLISVDTEHSNIYLQNGPI | sp P00450 | 0.00707  | 17328.8 | 20470.0 | 15642.0 | 23048.3  | 29543.2 | 22795.0  | 22902.7  | 21256.4  | 26853.3  |

|       |   |          |          |       |                    |           |           |          |         |         |         |         |         |         |         |         |         |
|-------|---|----------|----------|-------|--------------------|-----------|-----------|----------|---------|---------|---------|---------|---------|---------|---------|---------|---------|
| 2861  | 4 | 713.847  | 2851.359 | 11.79 | WYLFMGNEVDVHAAFF   | sp P00450 | 7.69E-05  | 14922.6  | 13715.7 | 15340.3 | 31444.3 | 23949.4 | 30665.4 | 12474.1 | 11290.6 | 9275.9  |         |
| 2932  | 4 | 850.672  | 3398.660 | 12.70 | QKDVDKEFYLFPTVFDE  | sp P00450 | 3.60E-05  | 14135.9  | 15108.1 | 13798.5 | 21382.2 | 18417.4 | 20970.8 | 26622.3 | 25367.3 | 23492.8 |         |
| 2947  | 2 | 1253.067 | 2504.119 | 15.17 | SGAGTEDSACIPWAYYS  | sp P00450 | 1.74E-05  | 37844.7  | 29004.1 | 31992.7 | 54448.7 | 47723.1 | 45566.0 | 23104.6 | 19161.0 | 20572.5 |         |
| 3036  | 2 | 666.316  | 1330.617 | 8.36  | EYTDASFTNRK        | sp P00450 | 0.01025   | 6011.6   | 8240.2  | 5687.1  | 8877.4  | 13202.3 | 9198.6  | 6591.7  | 5193.3  | 5640.0  |         |
| 3112  | 2 | 790.890  | 1579.765 | 6.02  | QYTDSTFRVPVER      | sp P00450 | 1.43E-06  | 5507.6   | 6149.0  | 5283.8  | 7278.6  | 7063.6  | 6125.5  | 17493.3 | 17748.2 | 15615.9 |         |
| 3225  | 4 | 404.200  | 1612.770 | 9.40  | PYTFHSHGITYYK      | sp P00450 | 2.17E-07  | 4917.3   | 4911.4  | 4875.2  | 8329.3  | 10597.8 | 7537.1  | 1485.7  | 1128.2  | 1191.2  |         |
| 3407  | 3 | 381.886  | 1142.636 | 3.98  | DIFTGLIGPMK        | sp P00450 | 0.007279  | 2574.5   | 2974.3  | 2295.8  | 2867.9  | 4015.5  | 2572.1  | 2438.6  | 2127.1  | 1967.2  |         |
| 3428  | 2 | 488.723  | 975.431  | 6.91  | TYSDHPEK           | sp P00450 | 2.87E-05  | 7054.1   | 6113.0  | 6807.8  | 11832.5 | 9056.6  | 11275.7 | 2216.3  | 2111.9  | 2579.2  |         |
| 3981  | 5 | 527.094  | 2630.432 | 5.61  | IYHSHIDAPKDIASGLIG | sp P00450 | 4.99E-08  | 2579.6   | 2950.3  | 2961.4  | 3397.6  | 4243.6  | 2937.1  | 19711.8 | 19563.2 | 19858.0 |         |
| 4018  | 4 | 1016.243 | 4060.943 | 7.07  | SGAGTEDSACIPWAYYS  | sp P00450 | 2.05E-08  | 18279.8  | 16056.5 | 17947.3 | 21072.6 | 17440.9 | 17278.7 | 93676.4 | 83432.1 | 87769.4 |         |
| 4119  | 3 | 783.064  | 2346.169 | 15.64 | MYSAVDPTKDIFTGLIG  | sp P00450 | 3.09E-05  | 5148.8   | 5192.0  | 4397.0  | 11160.4 | 9649.7  | 11229.4 | 14182.5 | 10785.5 | 15034.1 |         |
| 5748  | 2 | 956.570  | 1911.126 | 13.95 | TTIEKPVWLGLGPIIK   | sp P00450 | 0.008893  | 6351.2   | 8482.4  | 6905.2  | 10812.1 | 17072.1 | 10431.6 | 7723.2  | 7583.5  | 6742.9  |         |
| 5935  | 4 | 790.890  | 3159.532 | 12.84 | DVDKEFYLFPTVFDE    | sp P00450 | 8.20E-05  | 6000.7   | 5464.4  | 6473.1  | 9903.6  | 8407.9  | 8710.5  | 7556.3  | 8464.5  | 6689.3  |         |
| 6142  | 4 | 856.658  | 3422.605 | 18.90 | GDSVVWYLF          | SAGNEADV  | sp P00450 | 0.002134 | 16401.1 | 15196.0 | 16102.2 | 20497.1 | 16593.6 | 22702.3 | 20942.1 | 22566.5 | 21099.7 |
| 6285  | 3 | 924.817  | 2771.429 | 18.97 | ERGPEEEHLGILGPVI   | WAEV      | sp P00450 | 0.003822 | 11388.1 | 9183.0  | 9295.5  | 14678.2 | 17181.2 | 15680.3 | 12395.5 | 11875.0 | 10280.8 |
| 6695  | 3 | 1139.570 | 3415.687 | 18.71 | QKDVDKEFYLFPTVFDE  | sp P00450 | 0.002975  | 7857.6   | 7197.7  | 7304.0  | 14569.7 | 9782.8  | 11876.8 | 8309.3  | 8839.9  | 8685.5  |         |
| 7295  | 4 | 1016.999 | 4063.965 | 20.35 | IDTINLFPATLFDAYM   | VASQ      | sp P00450 | 1.72E-06 | 5196.4  | 5436.6  | 5440.8  | 17546.3 | 14013.7 | 16061.6 | 7605.5  | 8847.8  | 7988.7  |
| 7608  | 3 | 1141.875 | 3422.603 | 22.69 | GDSVVWYLF          | SAGNEADV  | sp P00450 | 0.001288 | 16825.8 | 16640.2 | 17356.6 | 23202.8 | 19303.4 | 25826.4 | 22726.4 | 23606.5 | 23587.5 |
| 7619  | 4 | 622.578  | 2486.284 | 6.64  | GPEEEHLGILGPVI     | WAEV      | sp P00450 | 0.000754 | 5287.6  | 5695.8  | 5689.8  | 7096.9  | 6956.0  | 7876.2  | 4230.5  | 5189.1  | 5160.1  |
| 8217  | 2 | 596.327  | 1190.640 | 8.56  | DIFTGLIGPMK        | sp P00450 | 0.0016    | 973.8    | 943.9   | 1183.1  | 2040.8  | 2110.0  | 1849.3  | 1523.5  | 1251.1  | 1125.0  |         |
| 8311  | 6 | 761.910  | 4565.413 | 6.84  | GPEEEHLGILGPVI     | WAEV      | sp P00450 | 1.21E-06 | 6445.0  | 7518.9  | 6370.5  | 5689.3  | 6050.0  | 6809.3  | 17177.3 | 15486.6 | 16145.5 |
| 9254  | 5 | 552.713  | 2758.526 | 11.00 | IYHSHIDAPKDIASGLIG | sp P00450 | 6.50E-08  | 538.2    | 753.7   | 555.3   | 589.2   | 739.6   | 462.6   | 16161.6 | 15886.3 | 11332.6 |         |
| 10046 | 4 | 679.344  | 2713.347 | 12.43 | HYYIAAEEIWNYP      | SGID      | sp P00450 | 6.40E-08 | 3507.8  | 3484.3  | 3316.9  | 6283.7  | 5222.9  | 6458.7  | 609.8   | 563.2   | 404.2   |
| 11846 | 3 | 1354.660 | 4060.959 | 23.25 | SGAGTEDSACIPWAYYS  | sp P00450 | 3.08E-08  | 4616.2   | 4329.5  | 5590.0  | 5729.2  | 4645.8  | 4679.4  | 31160.4 | 27814.8 | 30420.7 |         |
| 13220 | 4 | 996.494  | 3981.948 | 16.30 | SVPPSASHVAPTETFT   | YEE       | sp P00450 | 1.38E-06 | 498.8   | 1067.3  | 1002.8  | 229.0   | 499.9   | 563.4   | 26747.5 | 31083.4 | 27557.3 |
| 19790 | 3 | 901.779  | 2702.315 | 18.38 | EFYLFPTVFDE        | NESLLEI   | sp P00450 | 0.000247 | 911.6   | 814.3   | 822.5   | 1689.2  | 1409.8  | 1621.5  | 469.2   | 659.6   | 406.7   |
| 27152 | 2 | 507.217  | 1012.418 | 6.94  | TYCSEPEK           | sp P00450 | 8.65E-06  | 1858.3   | 1611.5  | 1932.6  | 3116.3  | 2277.9  | 3063.8  | 972.3   | 893.4   | 814.7   |         |
| 597   | 2 | 574.780  | 1147.546 | 9.21  | SGIECQLWR          | sp P00734 | 0.028851  | 28010.6  | 36827.5 | 29160.0 | 34188.6 | 40474.3 | 33500.3 | 37857.8 | 39735.5 | 52662.7 |         |
| 673   | 3 | 628.638  | 1882.891 | 10.75 | TFGSGEADCGLRPL     | FEK       | sp P00734 | 2.44E-05 | 54237.9 | 61570.8 | 58557.1 | 63919.7 | 71617.6 | 66314.5 | 58486.2 | 53579.3 | 55712.4 |
| 715   | 3 | 744.757  | 2231.250 | 12.95 | GQPSVLQVVNLPI      | VERPV     | sp P00734 | 0.017617 | 65718.2 | 49739.4 | 52455.7 | 71647.0 | 52049.1 | 65125.1 | 78660.6 | 92722.3 | 72696.0 |
| 733   | 3 | 665.689  | 1994.044 | 14.90 | LAVTTHGLPCLAWA     | SAQ       | sp P00734 | 0.005189 | 48927.7 | 56280.8 | 45161.0 | 52753.5 | 67114.4 | 47823.1 | 73541.9 | 67943.4 | 59435.1 |
| 1108  | 5 | 698.375  | 3486.838 | 11.52 | LKKPVAFSDYIHP      | CLPDI     | sp P00734 | 0.005392 | 37979.3 | 35189.8 | 43928.9 | 47569.9 | 66948.3 | 46327.5 | 71721.5 | 62804.4 | 52450.8 |
| 1114  | 2 | 597.805  | 1193.595 | 15.02 | ELLESYIDGR         | sp P00734 | 1.82E-06  | 20185.9  | 20603.1 | 18650.6 | 22506.3 | 25939.1 | 22191.9 | 13310.5 | 13047.6 | 12305.4 |         |
| 1207  | 2 | 781.369  | 1560.723 | 15.06 | TATSEYQTFNPR       | sp P00734 | 0.000127  | 30925.0  | 34539.9 | 29489.8 | 38679.9 | 42408.3 | 36888.5 | 47832.2 | 45874.5 | 39463.8 |         |

|      |   |          |          |       |                    |           |          |           |           |           |           |           |           |           |           |           |
|------|---|----------|----------|-------|--------------------|-----------|----------|-----------|-----------|-----------|-----------|-----------|-----------|-----------|-----------|-----------|
| 1243 | 3 | 738.010  | 2211.008 | 17.64 | DKLAACLEGNCAEGLGT  | sp P00734 | 0.00283  | 41330.4   | 29144.3   | 35122.8   | 43335.4   | 49910.9   | 39533.4   | 55913.0   | 50539.3   | 60317.8   |
| 1288 | 3 | 397.199  | 1188.574 | 6.76  | YGFYTHVFR          | sp P00734 | 0.001059 | 9403.6    | 12005.0   | 9910.5    | 10403.8   | 12570.5   | 10412.9   | 12820.4   | 12140.3   | 14190.6   |
| 1310 | 2 | 503.255  | 1004.495 | 6.03  | ETWTANVGK          | sp P00734 | 0.002858 | 9657.1    | 9060.0    | 10057.9   | 12324.0   | 15581.6   | 11773.0   | 13994.1   | 12136.6   | 13021.0   |
| 1406 | 2 | 437.744  | 873.473  | 5.28  | VTGWGNLK           | sp P00734 | 0.011407 | 8091.7    | 7600.4    | 8121.4    | 7809.8    | 10639.4   | 9373.1    | 8654.2    | 8311.5    | 9252.0    |
| 1946 | 3 | 655.309  | 1962.904 | 11.67 | HQDFNSAVQLVENFCR   | sp P00734 | 1.86E-08 | 17628.4   | 16640.4   | 18218.0   | 21921.8   | 20171.7   | 23512.5   | 7841.2    | 7051.0    | 7242.4    |
| 1951 | 4 | 503.754  | 2010.987 | 12.44 | TFGSGEADCGLRPLFEK  | sp P00734 | 6.61E-05 | 7904.7    | 10042.8   | 8175.1    | 7344.7    | 10301.4   | 7562.1    | 22910.4   | 21567.9   | 31607.2   |
| 2097 | 2 | 486.217  | 970.419  | 7.01  | YTACETAR           | sp P00734 | 0.001293 | 13655.6   | 11288.9   | 12688.7   | 16594.4   | 13768.0   | 16259.1   | 21212.7   | 20517.5   | 23653.2   |
| 2399 | 3 | 521.249  | 1560.724 | 6.38  | TATSEYQTTFFNPR     | sp P00734 | 0.000139 | 8075.5    | 8871.7    | 8914.8    | 9879.9    | 9480.9    | 9829.2    | 14234.6   | 13440.8   | 11505.2   |
| 4868 | 2 | 367.683  | 733.352  | 1.45  | SPFNNR             | sp P00734 | 0.000686 | 4983.5    | 4273.4    | 5185.5    | 5817.4    | 4851.5    | 5640.6    | 6536.6    | 6593.1    | 6631.4    |
| 5568 | 3 | 718.986  | 2153.936 | 12.12 | NPDSSTTGPWCYTTDPT  | sp P00734 | 2.99E-08 | 5901.5    | 6533.1    | 6029.7    | 13576.6   | 11081.2   | 12598.8   | 1685.9    | 1666.7    | 1292.5    |
| 6616 | 3 | 493.546  | 1477.616 | 10.67 | GDACEGDSGGPFVMK    | sp P00734 | 2.67E-05 | 3456.4    | 3620.4    | 3520.6    | 4184.2    | 4233.6    | 4165.0    | 2873.6    | 2923.8    | 2803.2    |
| 8119 | 3 | 752.057  | 2253.148 | 13.10 | TLDEFTIIQNLQPQYQFR | sp P00736 | 0.025234 | 3310.4    | 2532.0    | 3086.9    | 5392.0    | 3547.2    | 4150.5    | 3900.5    | 4532.2    | 3831.0    |
| 1    | 2 | 602.322  | 1202.630 | 13.20 | VTSIQDWVQK         | sp P00738 | 7.09E-05 | 1825986.9 | 1965019.3 | 1718245.7 | 1555540.2 | 1937719.7 | 1684234.1 | 3138003.3 | 3045356.8 | 2868703.6 |
| 2    | 2 | 490.751  | 979.488  | 8.00  | VGYSVSGWGR         | sp P00738 | 0.000507 | 826944.5  | 862480.2  | 764133.2  | 687875.2  | 1028514.4 | 736483.0  | 1546695.0 | 1450848.6 | 1893256.9 |
| 8    | 2 | 720.337  | 1438.659 | 16.11 | TEGDGVYTLNNEK      | sp P00738 | 0.027277 | 1051184.7 | 1109335.4 | 1101632.6 | 1121799.2 | 1308181.8 | 1065101.5 | 1279575.2 | 1314373.9 | 1639145.5 |
| 22   | 3 | 570.289  | 1707.846 | 10.19 | LRTEGDGVYTLNNEK    | sp P00738 | 0.000159 | 482534.4  | 492469.1  | 547805.8  | 438020.4  | 591857.1  | 526338.2  | 857333.6  | 853019.6  | 933199.8  |
| 30   | 5 | 687.325  | 3431.590 | 6.99  | AVGDKLPECEADDGCPK  | sp P00738 | 9.23E-05 | 1199447.7 | 1310342.2 | 1120443.4 | 1243566.7 | 1471497.4 | 1179491.9 | 2662172.9 | 2588919.9 | 3629565.9 |
| 31   | 4 | 447.485  | 1785.911 | 4.06  | VMPICLPSKDYAEVGR   | sp P00738 | 0.000545 | 283024.5  | 357940.8  | 319038.4  | 288835.9  | 424777.8  | 294246.9  | 610627.8  | 632728.5  | 721567.6  |
| 32   | 6 | 572.939  | 3431.593 | 5.11  | AVGDKLPECEADDGCPK  | sp P00738 | 4.23E-06 | 969327.2  | 959696.5  | 908728.6  | 991145.3  | 1047575.2 | 918697.6  | 2070501.5 | 2125199.8 | 2652680.0 |
| 33   | 3 | 1292.230 | 3873.667 | 22.09 | YQEDTCYGDAGSAFAVH  | sp P00738 | 9.32E-06 | 3482244.6 | 3239077.9 | 3143999.6 | 4028940.7 | 3710935.0 | 3856817.4 | 5550005.0 | 5116913.3 | 5039350.0 |
| 43   | 3 | 425.551  | 1273.632 | 6.77  | HYEGSTVPEKK        | sp P00738 | 0.004037 | 384038.7  | 311622.9  | 370275.8  | 406284.1  | 335955.1  | 397377.7  | 831590.4  | 1770137.2 | 969667.3  |
| 47   | 2 | 352.191  | 702.367  | 1.44  | VSVNER             | sp P00738 | 0.008702 | 249765.3  | 219262.7  | 256573.9  | 275498.2  | 212774.1  | 267568.1  | 427293.1  | 449832.9  | 475048.1  |
| 49   | 3 | 401.884  | 1202.631 | 7.00  | VTSIQDWVQK         | sp P00738 | 3.09E-06 | 133232.9  | 132821.7  | 133419.8  | 120237.3  | 127126.9  | 118400.5  | 241055.3  | 261855.3  | 256299.2  |
| 61   | 4 | 969.425  | 3873.670 | 15.30 | YQEDTCYGDAGSAFAVH  | sp P00738 | 3.78E-06 | 1831943.2 | 1780758.1 | 1890538.1 | 2146798.8 | 1941403.8 | 2086090.2 | 2862076.7 | 2911148.0 | 2890065.4 |
| 63   | 3 | 553.944  | 1658.811 | 6.01  | YVMLPVADQDQCIR     | sp P00738 | 3.93E-05 | 481706.4  | 541313.4  | 467339.8  | 432720.0  | 518934.9  | 495200.6  | 944455.2  | 841484.7  | 1088361.0 |
| 65   | 2 | 854.414  | 1706.813 | 15.11 | YVMLPVADQDQCIR     | sp P00738 | 0.000193 | 311218.0  | 426311.1  | 313176.6  | 449019.4  | 564768.9  | 449920.2  | 876234.9  | 928439.0  | 742977.3  |
| 74   | 4 | 531.770  | 2123.050 | 13.01 | SPVGVQPILNEHTFCAGM | sp P00738 | 0.000276 | 282212.1  | 367348.6  | 253927.8  | 246849.0  | 251856.0  | 276148.9  | 570643.6  | 485264.1  | 632564.3  |
| 81   | 2 | 405.194  | 808.373  | 3.79  | DYAEVGR            | sp P00738 | 0.002224 | 105099.4  | 88249.9   | 102513.9  | 127479.2  | 113173.4  | 123327.6  | 91976.6   | 92877.1   | 91302.9   |
| 95   | 3 | 569.946  | 1706.815 | 14.27 | YVMLPVADQDQCIR     | sp P00738 | 3.59E-05 | 150924.3  | 186056.8  | 153304.1  | 205493.4  | 240604.3  | 194384.7  | 390911.9  | 419634.6  | 344029.6  |
| 98   | 1 | 980.495  | 979.488  | 3.17  | VGYSVSGWGR         | sp P00738 | 0.016542 | 225576.7  | 300515.3  | 180121.1  | 176137.5  | 395934.9  | 218557.1  | 458731.5  | 432396.1  | 749356.0  |
| 126  | 3 | 596.311  | 1785.910 | 12.97 | VMPICLPSKDYAEVGR   | sp P00738 | 0.012628 | 137762.7  | 208809.5  | 170082.6  | 138522.8  | 287562.6  | 166157.9  | 347468.1  | 334954.2  | 447476.7  |
| 138  | 2 | 854.929  | 1707.844 | 12.75 | LRTEGDGVYTLNNEK    | sp P00738 | 0.000959 | 205712.6  | 226497.3  | 213777.7  | 209061.6  | 320253.4  | 251793.7  | 392674.3  | 403357.2  | 427393.0  |
| 149  | 3 | 599.010  | 1794.008 | 14.90 | VVLHPNYSQVDIGLIK   | sp P00738 | 0.005809 | 140205.9  | 195832.0  | 134075.2  | 120708.9  | 142188.7  | 114657.0  | 251867.1  | 203994.0  | 204515.1  |
| 160  | 3 | 703.680  | 2108.019 | 17.70 | TEGDGVYTLNNEKQWINI | sp P00738 | 3.05E-09 | 69768.0   | 94975.2   | 76622.7   | 47925.1   | 50406.0   | 57345.9   | 643101.3  | 597171.3  | 655516.5  |

|      |   |          |          |       |                    |           |          |          |          |          |          |          |          |          |           |          |
|------|---|----------|----------|-------|--------------------|-----------|----------|----------|----------|----------|----------|----------|----------|----------|-----------|----------|
| 173  | 2 | 471.755  | 941.495  | 5.94  | QKVSVNER           | sp P00738 | 2.72E-08 | 33990.5  | 33606.8  | 34128.2  | 42398.2  | 33383.3  | 37844.3  | 143542.6 | 127050.0  | 137613.3 |
| 174  | 3 | 708.690  | 2123.047 | 17.95 | SPVGVQPILNEHTFCAGM | sp P00738 | 0.001495 | 209460.5 | 284403.4 | 183230.2 | 182497.7 | 169764.9 | 190810.5 | 414877.9 | 342038.7  | 561541.8 |
| 177  | 3 | 320.514  | 958.521  | 5.24  | QKVSVNER           | sp P00738 | 0.001992 | 55857.3  | 46464.3  | 55541.3  | 60922.1  | 45325.5  | 57975.8  | 149710.7 | 322844.0  | 194100.4 |
| 212  | 3 | 480.561  | 1438.661 | 7.99  | TEGDGVYTLNNEK      | sp P00738 | 0.000522 | 71494.0  | 65483.1  | 73173.0  | 76156.1  | 76691.7  | 72751.2  | 89028.5  | 88143.5   | 101113.0 |
| 221  | 2 | 637.823  | 1273.632 | 14.71 | HYEGSTVPEKK        | sp P00738 | 0.002683 | 149157.5 | 124756.4 | 160488.7 | 146981.9 | 125763.7 | 181604.7 | 561305.6 | 1126028.1 | 696141.5 |
| 246  | 1 | 1203.637 | 1202.630 | 6.54  | VTSIQDWVQK         | sp P00738 | 1.44E-05 | 188046.7 | 210586.3 | 165396.7 | 169577.1 | 214335.9 | 181154.1 | 422814.5 | 420678.5  | 420118.9 |
| 306  | 3 | 570.289  | 1707.845 | 3.30  | LRTEGDGVYTLNNEK    | sp P00738 | 5.08E-08 | 28880.1  | 38089.3  | 35851.4  | 21374.4  | 27599.9  | 22152.3  | 218194.9 | 209318.3  | 256865.5 |
| 335  | 3 | 570.617  | 1708.830 | 7.79  | LRTEGDGVYTLNNEK    | sp P00738 | 6.64E-05 | 77506.3  | 88459.8  | 79167.9  | 85311.0  | 111723.7 | 90069.3  | 166988.6 | 156185.1  | 154809.4 |
| 356  | 4 | 858.904  | 3431.587 | 19.34 | AVGDKLPECEADDGCPK  | sp P00738 | 0.002593 | 176699.2 | 233728.2 | 162261.9 | 182761.9 | 277085.5 | 182496.7 | 451398.5 | 392461.5  | 685101.1 |
| 408  | 4 | 319.415  | 1273.632 | 5.67  | HYEGSTVPEKK        | sp P00738 | 0.000714 | 46139.4  | 39667.2  | 48024.6  | 51578.7  | 42295.9  | 50858.4  | 117688.2 | 187639.5  | 122814.9 |
| 425  | 2 | 573.776  | 1145.537 | 9.01  | HYEGSTVPEK         | sp P00738 | 0.000606 | 80338.0  | 67308.8  | 61311.4  | 105651.2 | 87432.1  | 91725.4  | 133821.2 | 115457.9  | 168368.7 |
| 432  | 4 | 595.309  | 2377.209 | 7.97  | LRTEGDGVYTLNNEKQW  | sp P00738 | 5.99E-10 | 15915.5  | 19870.2  | 17087.2  | 13117.6  | 9949.9   | 10500.4  | 261527.7 | 249111.9  | 255865.0 |
| 438  | 5 | 593.276  | 2961.343 | 12.83 | LPECEADDGCPKPEIAH  | sp P00738 | 0.00606  | 139768.9 | 145568.9 | 129539.4 | 165662.9 | 191238.3 | 164798.3 | 180796.0 | 170800.5  | 207071.8 |
| 602  | 2 | 480.268  | 958.521  | 3.65  | QKVSVNER           | sp P00738 | 0.000387 | 25800.5  | 20955.1  | 23733.1  | 29725.1  | 21811.7  | 28573.9  | 83256.3  | 221296.9  | 118004.5 |
| 680  | 2 | 352.683  | 703.351  | 1.43  | VSVNER             | sp P00738 | 0.001237 | 7887.6   | 7048.3   | 8707.4   | 8851.5   | 7899.1   | 9730.4   | 15936.5  | 15869.3   | 13881.7  |
| 749  | 3 | 382.853  | 1145.537 | 3.97  | HYEGSTVPEK         | sp P00738 | 0.002326 | 27829.7  | 22874.6  | 27228.8  | 32832.6  | 25446.7  | 30533.5  | 54938.5  | 52764.3   | 52589.0  |
| 844  | 2 | 471.754  | 941.494  | 7.18  | QKVSVNER           | sp P00738 | 0.000574 | 20697.0  | 17109.1  | 20623.0  | 23265.6  | 16851.3  | 22812.2  | 65849.6  | 134189.3  | 82256.1  |
| 929  | 3 | 704.009  | 2109.006 | 18.64 | TEGDGVYTLNNEKQWINI | sp P00738 | 1.28E-05 | 31219.6  | 26156.5  | 35863.1  | 28676.3  | 29693.3  | 30559.3  | 70628.2  | 77520.9   | 82219.9  |
| 1009 | 3 | 389.843  | 1166.508 | 3.42  | YQCKNYYK           | sp P00738 | 5.68E-05 | 8418.2   | 8136.4   | 9198.6   | 9811.1   | 6825.4   | 9054.9   | 21452.6  | 19293.3   | 18503.4  |
| 1527 | 4 | 334.674  | 1334.665 | 1.41  | NANFKFTDHLK        | sp P00738 | 6.56E-08 | 3764.0   | 4091.7   | 3608.4   | 3333.0   | 4114.0   | 3360.8   | 14134.3  | 13390.1   | 14726.6  |
| 1551 | 3 | 793.409  | 2377.205 | 16.88 | LRTEGDGVYTLNNEKQW  | sp P00738 | 2.63E-09 | 4418.4   | 6854.9   | 5618.7   | 4182.0   | 3784.9   | 3466.9   | 104809.5 | 103809.5  | 103351.0 |
| 1598 | 4 | 543.771  | 2171.054 | 12.67 | SPVGVQPILNEHTFCAGM | sp P00738 | 6.32E-05 | 10282.0  | 8680.8   | 10713.1  | 15144.4  | 10332.5  | 13408.7  | 24514.7  | 28379.1   | 28703.0  |
| 1607 | 2 | 1055.017 | 2108.019 | 14.75 | TEGDGVYTLNNEKQWINI | sp P00738 | 9.16E-07 | 11371.7  | 18991.0  | 9655.1   | 7692.6   | 11188.8  | 9408.8   | 127341.7 | 111790.7  | 132362.1 |
| 2065 | 2 | 917.964  | 1833.913 | 9.02  | VMPICLPSKDYAEVGR   | sp P00738 | 0.001089 | 13575.7  | 14910.9  | 11292.2  | 18195.1  | 25545.2  | 18784.1  | 36013.5  | 37870.3   | 73051.2  |
| 2189 | 4 | 459.486  | 1833.915 | 3.55  | VMPICLPSKDYAEVGR   | sp P00738 | 5.95E-05 | 5282.1   | 5898.7   | 5388.9   | 6347.7   | 8726.8   | 7175.5   | 15139.0  | 15755.8   | 22818.5  |
| 2604 | 2 | 584.261  | 1166.508 | 1.47  | YQCKNYYK           | sp P00738 | 2.68E-05 | 5096.9   | 4654.7   | 5156.1   | 5730.2   | 5455.2   | 6091.8   | 10891.1  | 9272.2    | 9780.5   |
| 2638 | 2 | 602.324  | 1202.634 | 11.67 | VTSIQDWVQK         | sp P00738 | 8.08E-05 | 6382.2   | 7579.5   | 7004.3   | 6781.9   | 6785.6   | 6401.9   | 11494.8  | 10139.6   | 12172.3  |
| 2679 | 3 | 389.843  | 1166.508 | 3.34  | YQCKNYYK           | sp P00738 | 3.38E-08 | 3393.4   | 3269.2   | 3838.8   | 3383.9   | 3646.2   | 3751.8   | 9759.4   | 9616.3    | 9256.2   |
| 2686 | 3 | 389.515  | 1165.524 | 3.67  | YQCKNYYK           | sp P00738 | 1.09E-05 | 5183.5   | 4439.6   | 5306.9   | 5342.1   | 4390.7   | 5005.6   | 12273.6  | 12301.1   | 11798.3  |
| 2968 | 4 | 532.016  | 2124.035 | 10.61 | SPVGVQPILNEHTFCAGM | sp P00738 | 0.000828 | 11533.8  | 11973.3  | 10558.3  | 10877.6  | 14105.3  | 9688.9   | 20740.9  | 18277.8   | 23496.3  |
| 3250 | 2 | 352.683  | 703.351  | 1.43  | VSVNER             | sp P00738 | 8.01E-05 | 7901.9   | 6995.0   | 8416.9   | 9133.3   | 7286.9   | 8656.4   | 16666.8  | 16248.8   | 16775.2  |
| 3716 | 4 | 659.378  | 2633.484 | 10.83 | QLVEIEKVVLPNYSQVD  | sp P00738 | 2.60E-09 | 585.3    | 561.3    | 482.9    | 206.7    | 208.2    | 346.0    | 34393.5  | 29620.9   | 30842.3  |
| 3808 | 4 | 449.509  | 1794.007 | 6.72  | VVLHPNYSQVDIGLIK   | sp P00738 | 0.00196  | 2733.5   | 4358.8   | 3226.1   | 2474.5   | 3188.6   | 2623.3   | 6355.7   | 5392.1    | 5555.9   |
| 5108 | 3 | 320.842  | 959.506  | 4.31  | QKVSVNER           | sp P00738 | 0.000122 | 2442.3   | 1915.0   | 2484.4   | 2778.7   | 2156.9   | 2625.7   | 8059.6   | 7632.3    | 8438.4   |

|       |   |          |          |       |                     |           |          |         |         |         |         |         |         |          |          |          |
|-------|---|----------|----------|-------|---------------------|-----------|----------|---------|---------|---------|---------|---------|---------|----------|----------|----------|
| 6128  | 4 | 1301.080 | 5200.292 | 19.86 | YQEDTCYGDAGSAFAVH   | sp P00738 | 6.85E-11 | 7489.9  | 6718.9  | 5877.6  | 8295.1  | 6405.3  | 8418.6  | 587627.2 | 611586.0 | 555979.3 |
| 6136  | 5 | 775.741  | 3873.669 | 10.09 | YQEDTCYGDAGSAFAVH   | sp P00738 | 0.005964 | 7203.5  | 7659.9  | 10541.6 | 9752.4  | 9667.8  | 9159.7  | 14912.6  | 16353.8  | 13462.7  |
| 9004  | 2 | 583.770  | 1165.524 | 1.44  | YQCKNYK             | sp P00738 | 0.00448  | 1563.1  | 1367.5  | 1530.1  | 1737.4  | 1439.7  | 1630.7  | 3861.0   | 3591.0   | 4304.6   |
| 16091 | 3 | 873.160  | 2616.457 | 16.97 | QLVEIEKVVLHPNYSQVD  | sp P00738 | 0.001689 | 65.8    | 47.0    | 0.1     | 49.9    | 112.7   | 56.2    | 8138.5   | 9346.8   | 7886.8   |
| 27030 | 3 | 500.625  | 1498.854 | 7.65  | SDLGAVISLLWGR       | sp P00739 | 0.000879 | 186.6   | 156.7   | 165.9   | 204.8   | 243.7   | 181.9   | 190.4    | 239.3    | 180.6    |
| 28762 | 2 | 750.434  | 1498.854 | 15.06 | SDLGAVISLLWGR       | sp P00739 | 0.004421 | 335.0   | 266.4   | 266.6   | 241.7   | 356.1   | 318.8   | 358.0    | 349.2    | 241.7    |
| 7583  | 3 | 677.024  | 2028.051 | 7.63  | NKPGVYTDVAYYLAWIR   | sp P00748 | 9.04E-05 | 2912.1  | 3270.4  | 3431.3  | 3866.9  | 3749.5  | 3577.6  | 2063.9   | 2029.0   | 1552.2   |
| 3899  | 2 | 754.848  | 1507.681 | 17.06 | VSEADSSNADWVTK      | sp P00751 | 0.045155 | 6227.4  | 8906.0  | 5907.1  | 5736.4  | 6518.2  | 4941.6  | 8406.8   | 7704.5   | 9933.7   |
| 4975  | 3 | 939.132  | 2814.373 | 17.38 | LLQEGQALEYVCPSPGFYF | sp P00751 | 0.000479 | 10347.3 | 9266.7  | 8831.4  | 9212.0  | 8609.8  | 8542.6  | 16221.6  | 15656.6  | 11922.9  |
| 6231  | 3 | 326.191  | 975.552  | 5.82  | VASYGVKPR           | sp P00751 | 0.008795 | 838.5   | 741.9   | 963.5   | 634.7   | 606.4   | 716.3   | 880.9    | 1054.8   | 1191.0   |
| 6902  | 3 | 590.664  | 1768.970 | 6.77  | DFHINLFQVLPWLK      | sp P00751 | 0.026015 | 2992.4  | 2333.0  | 2735.0  | 3191.3  | 2432.8  | 2920.5  | 3945.5   | 4063.1   | 3282.6   |
| 485   | 3 | 411.581  | 1231.721 | 6.30  | ANRPFLVFIR          | sp P01008 | 0.021803 | 27002.9 | 34159.1 | 30416.7 | 22271.5 | 30341.4 | 22870.2 | 30515.9  | 32234.5  | 35096.5  |
| 525   | 3 | 447.560  | 1339.659 | 9.11  | TSDQIHFFFAK         | sp P01008 | 0.012541 | 31183.8 | 37750.5 | 40149.6 | 28973.1 | 30268.1 | 31153.0 | 26343.2  | 30378.7  | 26584.5  |
| 670   | 2 | 394.211  | 786.407  | 3.89  | VANPCVK             | sp P01008 | 0.04335  | 14461.4 | 13081.3 | 15692.8 | 12358.7 | 10250.9 | 13064.1 | 16338.8  | 15949.7  | 14393.4  |
| 986   | 3 | 404.553  | 1210.637 | 7.46  | FRIEDGFSLK          | sp P01008 | 4.98E-05 | 15019.0 | 14701.2 | 15481.8 | 11527.2 | 13715.6 | 11524.9 | 7002.7   | 7031.3   | 9065.2   |
| 1174  | 2 | 381.214  | 760.413  | 1.40  | VWELSK              | sp P01008 | 0.048319 | 7674.0  | 8708.4  | 7487.7  | 5564.9  | 7962.8  | 6491.6  | 8808.0   | 8793.4   | 9743.4   |
| 1361  | 3 | 558.954  | 1673.841 | 6.51  | LQPLDFKENAEQSR      | sp P01008 | 0.017902 | 19257.2 | 27451.6 | 16189.9 | 11985.4 | 16000.9 | 11346.2 | 21431.0  | 22383.3  | 28808.2  |
| 1462  | 3 | 764.390  | 2290.147 | 15.38 | AFLEVNEEGSEAAASTAV  | sp P01008 | 0.012858 | 52011.0 | 46226.2 | 48148.5 | 42450.8 | 38580.6 | 45660.4 | 47311.0  | 47882.2  | 44630.3  |
| 1601  | 4 | 605.067  | 2416.239 | 10.92 | SKLPGIVAEGRDDLYVSD  | sp P01008 | 0.004379 | 26501.0 | 33368.5 | 29221.9 | 17127.3 | 21969.0 | 18637.6 | 30535.8  | 25503.7  | 32252.6  |
| 1960  | 4 | 508.500  | 2029.969 | 11.29 | ATEDEGSEQKIPEATNRR  | sp P01008 | 3.66E-05 | 15416.1 | 13299.7 | 13722.9 | 11966.3 | 11779.1 | 10965.1 | 21594.0  | 21595.6  | 18544.2  |
| 2016  | 2 | 459.265  | 916.515  | 1.39  | RVWELSK             | sp P01008 | 0.041104 | 7349.0  | 9063.9  | 8889.9  | 6041.1  | 6918.4  | 6137.4  | 7229.5   | 6730.0   | 6713.9   |
| 2666  | 3 | 600.973  | 1799.898 | 7.74  | EQLQDMGLVDLFSPEK    | sp P01008 | 8.12E-08 | 13856.9 | 13805.1 | 15059.0 | 11581.8 | 11990.3 | 11093.7 | 5104.6   | 4462.0   | 4749.5   |
| 2936  | 2 | 420.212  | 838.409  | 5.72  | FDTISEK             | sp P01008 | 1.69E-08 | 4154.0  | 3921.4  | 4531.2  | 4099.6  | 4171.1  | 4240.7  | 1254.4   | 1322.4   | 1340.0   |
| 3038  | 2 | 350.691  | 699.367  | 2.11  | SLNPNR              | sp P01008 | 0.027669 | 8944.7  | 7239.4  | 8267.7  | 8246.4  | 5919.8  | 7120.8  | 8624.7   | 8512.6   | 11095.7  |
| 4218  | 3 | 326.839  | 977.495  | 5.27  | FSPENTRK            | sp P01008 | 0.017651 | 5213.8  | 4198.5  | 5026.4  | 4753.3  | 3676.8  | 4195.2  | 4654.9   | 4654.8   | 4755.1   |
| 10435 | 4 | 761.139  | 3040.526 | 11.51 | FRIEDGFSLKEQLQDMGL  | sp P01008 | 2.06E-06 | 2196.2  | 2471.6  | 2146.0  | 2551.1  | 2434.0  | 2066.8  | 9191.0   | 8905.2   | 7075.3   |
| 17601 | 3 | 767.049  | 2298.124 | 11.28 | NDNDNIFLSPLSISTAFAM | sp P01008 | 0.001145 | 1243.4  | 1087.7  | 1002.3  | 1587.1  | 950.4   | 1284.6  | 439.0    | 361.1    | 520.7    |
| 21601 | 4 | 856.433  | 3421.702 | 16.52 | VEKELTPEVLQEWLDELE  | sp P01008 | 1.06E-05 | 692.8   | 815.9   | 885.7   | 488.4   | 490.4   | 826.8   | 3960.6   | 3491.7   | 3433.5   |
| 24442 | 4 | 876.750  | 3502.972 | 12.67 | ITDVIPSEAINELTVLVN  | sp P01008 | 0.000287 | 1269.4  | 1241.1  | 1026.6  | 680.3   | 558.0   | 635.9   | 1532.3   | 1873.0   | 1268.3   |
| 33173 | 3 | 935.857  | 2804.550 | 7.58  | ITDVIPSEAINELTVLVN  | sp P01008 | 0.016346 | 416.4   | 434.5   | 417.1   | 539.5   | 447.1   | 612.1   | 511.0    | 498.4    | 547.0    |
| 311   | 3 | 360.181  | 1077.522 | 5.32  | FLENEDRR            | sp P01009 | 0.030685 | 28536.5 | 27043.3 | 31545.1 | 29322.9 | 27444.3 | 27289.7 | 30564.7  | 28218.2  | 31889.6  |
| 415   | 2 | 444.756  | 887.498  | 6.99  | AVLTIDEK            | sp P01009 | 0.029195 | 29241.4 | 42833.0 | 29392.2 | 26849.9 | 40672.3 | 29048.9 | 20700.9  | 20117.7  | 22293.3  |
| 440   | 2 | 504.754  | 1007.494 | 6.33  | QINDYVEK            | sp P01009 | 4.52E-07 | 40781.1 | 48394.8 | 39636.3 | 32158.7 | 37154.5 | 38892.0 | 12556.3  | 13240.0  | 11527.8  |
| 561   | 3 | 697.372  | 2089.093 | 10.19 | ELDRDVFALVNYIFFK    | sp P01009 | 0.000394 | 65984.9 | 63123.7 | 55124.6 | 75108.0 | 71767.1 | 68162.7 | 44650.0  | 38615.4  | 39182.7  |

|       |   |         |          |       |                    |           |          |         |         |         |         |         |         |          |          |          |
|-------|---|---------|----------|-------|--------------------|-----------|----------|---------|---------|---------|---------|---------|---------|----------|----------|----------|
| 609   | 4 | 334.199 | 1332.767 | 4.15  | LVDKFLEDVKK        | sp P01009 | 0.000142 | 18464.9 | 22568.2 | 19105.5 | 17620.7 | 26649.2 | 16935.6 | 6668.5   | 7774.6   | 8349.0   |
| 627   | 3 | 721.712 | 2162.114 | 19.64 | VFSNGADLSGVTEEAPLk | sp P01009 | 5.90E-09 | 44757.1 | 40836.2 | 43593.7 | 36490.3 | 35889.5 | 33342.8 | 111899.3 | 103552.1 | 100702.2 |
| 643   | 3 | 284.837 | 851.488  | 8.58  | SASLHLPK           | sp P01009 | 0.028255 | 14024.8 | 16550.6 | 14653.8 | 13469.3 | 14271.4 | 13471.2 | 14853.6  | 14661.4  | 13535.5  |
| 674   | 4 | 547.267 | 2185.038 | 12.70 | LYHSEFTVNFQDTEEAK  | sp P01009 | 5.27E-06 | 64080.2 | 76493.0 | 62610.4 | 61645.4 | 75768.2 | 62701.5 | 24214.2  | 21543.0  | 27642.4  |
| 769   | 3 | 721.384 | 2161.129 | 20.70 | VFSNGADLSGVTEEAPLk | sp P01009 | 1.43E-05 | 35588.2 | 45490.8 | 35726.8 | 25634.4 | 27253.7 | 22880.1 | 82321.7  | 83838.6  | 69057.8  |
| 972   | 2 | 821.437 | 1640.860 | 15.06 | ITPNLAIEFAFSLYR    | sp P01009 | 2.89E-05 | 72388.0 | 59057.2 | 73623.6 | 75153.6 | 68189.4 | 70956.1 | 42201.5  | 41190.6  | 35930.1  |
| 981   | 5 | 356.760 | 1778.763 | 1.44  | TDTSHHDQDHTFNK     | sp P01009 | 0.001575 | 16318.3 | 8158.6  | 12555.9 | 18604.7 | 13957.9 | 17601.2 | 5019.3   | 3352.2   | 4901.1   |
| 997   | 2 | 917.958 | 1833.901 | 19.95 | VFSNGADLSGVTEEAPLk | sp P01009 | 1.93E-06 | 52308.2 | 62080.0 | 63586.8 | 71718.4 | 91997.9 | 68755.0 | 23484.5  | 23221.8  | 24053.7  |
| 1184  | 5 | 630.511 | 3147.520 | 11.60 | GKWERPFVFKDTEEEEDF | sp P01009 | 8.14E-05 | 55316.8 | 70733.0 | 54020.1 | 49517.9 | 63074.4 | 49428.8 | 26245.3  | 24617.5  | 26901.6  |
| 1196  | 3 | 400.538 | 1198.594 | 7.00  | LGMFNIQHCK         | sp P01009 | 0.001892 | 13270.0 | 11918.4 | 14596.8 | 11575.2 | 11447.0 | 11166.9 | 14101.7  | 14388.0  | 15547.8  |
| 1282  | 3 | 858.786 | 2573.337 | 19.38 | TLNQPDSQLQLTTGNLFP | sp P01009 | 2.20E-06 | 46777.4 | 42481.0 | 48117.6 | 57251.0 | 48473.8 | 59664.0 | 20743.5  | 19403.2  | 17925.9  |
| 1332  | 4 | 445.698 | 1778.763 | 4.52  | TDTSHHDQDHTFNK     | sp P01009 | 0.005134 | 15251.3 | 6537.4  | 11386.8 | 20073.5 | 14954.3 | 17566.9 | 3880.8   | 2076.3   | 3397.6   |
| 1336  | 3 | 859.115 | 2574.322 | 21.38 | TLNQPDSQLQLTTGNLFP | sp P01009 | 2.62E-06 | 60302.5 | 44181.2 | 56661.7 | 81816.8 | 72369.8 | 76237.4 | 18870.6  | 18996.8  | 14642.4  |
| 1355  | 3 | 547.961 | 1640.860 | 13.27 | ITPNLAIEFAFSLYR    | sp P01009 | 6.44E-05 | 32374.8 | 25298.0 | 30169.7 | 31331.4 | 25374.1 | 30059.9 | 17168.3  | 16872.8  | 15220.1  |
| 1421  | 2 | 917.465 | 1832.916 | 17.95 | VFSNGADLSGVTEEAPLk | sp P01009 | 4.06E-05 | 36019.4 | 49042.4 | 34369.8 | 38470.2 | 42616.2 | 34956.1 | 14088.9  | 15170.6  | 12372.4  |
| 1704  | 4 | 452.750 | 1806.970 | 7.34  | FNKPFVFLMIEQNTK    | sp P01009 | 0.034116 | 20950.0 | 33855.4 | 23714.8 | 23714.3 | 34506.4 | 21115.7 | 31119.6  | 34537.4  | 43132.3  |
| 2126  | 3 | 612.308 | 1833.903 | 15.07 | VFSNGADLSGVTEEAPLk | sp P01009 | 4.62E-06 | 13493.3 | 14264.9 | 15242.2 | 16755.8 | 20533.1 | 15180.6 | 6377.8   | 5881.9   | 6204.2   |
| 2169  | 3 | 402.565 | 1204.673 | 4.83  | LVDKFLEDVKK        | sp P01009 | 0.001324 | 6051.4  | 8909.6  | 6844.4  | 6080.9  | 8200.0  | 5552.2  | 2764.6   | 2588.2   | 3831.5   |
| 2411  | 3 | 293.505 | 877.493  | 1.42  | FLEDVKK            | sp P01009 | 9.71E-11 | 3766.2  | 3876.2  | 3662.4  | 3946.7  | 3540.0  | 3860.4  | 594.8    | 546.1    | 601.1    |
| 2503  | 3 | 593.928 | 1778.763 | 10.47 | TDTSHHDQDHTFNK     | sp P01009 | 0.003432 | 10580.7 | 5124.4  | 9774.0  | 13270.5 | 10868.1 | 14469.7 | 3212.0   | 2019.3   | 2795.0   |
| 2522  | 3 | 721.712 | 2162.114 | 19.64 | VFSNGADLSGVTEEAPLk | sp P01009 | 8.54E-06 | 9259.6  | 9222.9  | 9310.6  | 7531.3  | 9841.9  | 7599.6  | 19214.7  | 22011.3  | 19266.7  |
| 2587  | 2 | 366.209 | 730.403  | 3.74  | SPLFMGK            | sp P01009 | 0.002927 | 12555.4 | 11105.5 | 13602.2 | 11454.9 | 9777.4  | 11434.5 | 16258.7  | 15829.3  | 17559.2  |
| 2614  | 4 | 339.681 | 1354.695 | 5.80  | RLGMFNIQHCK        | sp P01009 | 0.008525 | 4821.8  | 4242.4  | 4978.3  | 4334.4  | 3816.0  | 4585.6  | 4781.3   | 5093.7   | 5986.2   |
| 2788  | 3 | 729.353 | 2185.036 | 18.70 | LYHSEFTVNFQDTEEAK  | sp P01009 | 0.00035  | 20718.0 | 25253.5 | 19568.7 | 19331.0 | 25189.3 | 18171.1 | 9846.3   | 8501.4   | 11481.2  |
| 2871  | 2 | 538.813 | 1075.612 | 9.00  | LSSWVLLMK          | sp P01009 | 0.001236 | 3766.8  | 2934.2  | 3831.6  | 4817.6  | 5549.7  | 5200.7  | 4989.7   | 4884.3   | 4274.9   |
| 4197  | 2 | 461.718 | 921.420  | 2.21  | FLENEDR            | sp P01009 | 0.000152 | 2017.2  | 2037.4  | 2170.8  | 2095.7  | 2384.4  | 2048.4  | 1705.7   | 1420.8   | 1524.0   |
| 4247  | 3 | 686.654 | 2056.941 | 11.49 | LYHSEFTVNFQDTEEAK  | sp P01009 | 5.55E-05 | 9004.5  | 10461.4 | 9596.2  | 10670.4 | 12107.0 | 9594.3  | 4126.8   | 3776.0   | 5268.9   |
| 6612  | 5 | 635.911 | 3174.519 | 4.19  | LYHSEFTVNFQDTEEAK  | sp P01009 | 5.43E-07 | 2140.4  | 2083.9  | 1652.0  | 362.8   | 288.8   | 685.6   | 9962.5   | 11429.2  | 9333.7   |
| 8152  | 5 | 593.488 | 2962.405 | 6.29  | WERPFVFKDTEEEEDFHV | sp P01009 | 1.27E-08 | 4051.3  | 4412.3  | 4052.4  | 4025.3  | 4432.5  | 3705.1  | 722.6    | 698.4    | 834.1    |
| 8231  | 4 | 690.137 | 2756.520 | 7.75  | IVDLVKELDRDVFALVN\ | sp P01009 | 1.81E-10 | 923.1   | 753.1   | 851.9   | 343.0   | 378.8   | 307.3   | 9913.4   | 10949.9  | 9542.6   |
| 8830  | 4 | 523.280 | 2089.092 | 11.41 | ELDRDVFALVNYIFFK   | sp P01009 | 2.11E-05 | 1835.4  | 1526.0  | 1551.0  | 1950.2  | 1826.5  | 1653.3  | 884.8    | 769.6    | 774.7    |
| 26588 | 2 | 788.926 | 1575.837 | 15.06 | DTVFALVNYIFFK      | sp P01009 | 4.41E-06 | 629.4   | 718.3   | 467.6   | 781.5   | 708.9   | 833.1   | 110.7    | 117.0    | 72.3     |
| 35758 | 4 | 941.253 | 3760.982 | 9.83  | TLNQPDSQLQLTTGNLFP | sp P01009 | 6.83E-07 | 61.5    | 72.8    | 125.2   | 33.9    | 58.3    | 25.3    | 1760.2   | 1876.6   | 1715.8   |
| 206   | 2 | 531.298 | 1060.582 | 12.98 | EIGELYLPK          | sp P01011 | 0.04515  | 73347.5 | 91565.6 | 98385.2 | 91169.8 | 93143.3 | 99286.6 | 104754.8 | 117378.4 | 108341.8 |



|       |   |          |          |       |                     |           |          |          |          |          |          |          |          |          |          |          |
|-------|---|----------|----------|-------|---------------------|-----------|----------|----------|----------|----------|----------|----------|----------|----------|----------|----------|
| 298   | 3 | 370.190  | 1107.548 | 3.45  | WRDSLEFR            | sp P01011 | 0.009167 | 22483.0  | 31333.0  | 24821.7  | 22781.1  | 34051.2  | 26850.3  | 40518.6  | 42787.1  | 47951.0  |
| 308   | 3 | 365.549  | 1093.626 | 8.57  | NLAVSQVVHK          | sp P01011 | 0.001561 | 32597.5  | 31690.7  | 30820.1  | 35719.9  | 37835.8  | 32242.6  | 38776.5  | 40097.4  | 45254.1  |
| 480   | 2 | 432.746  | 863.477  | 1.45  | LINDYVK             | sp P01011 | 0.020863 | 18660.7  | 18753.5  | 20361.3  | 21117.4  | 24465.1  | 21098.1  | 24758.5  | 24074.1  | 30271.4  |
| 619   | 3 | 636.659  | 1906.956 | 18.11 | AVLDVFEEGTEASAATAV  | sp P01011 | 0.009607 | 52870.3  | 44727.5  | 51838.9  | 68426.1  | 62227.7  | 59489.2  | 46098.8  | 49379.8  | 38491.5  |
| 716   | 4 | 455.994  | 1819.945 | 4.95  | EQLSLLDRFTEDAKR     | sp P01011 | 1.35E-06 | 19526.0  | 21724.7  | 23829.3  | 18930.7  | 19725.6  | 19237.9  | 38598.4  | 38472.3  | 40496.8  |
| 944   | 2 | 383.691  | 765.368  | 1.86  | DSLEFR              | sp P01011 | 0.00043  | 8609.4   | 9512.6   | 8884.8   | 9309.2   | 12571.1  | 10595.6  | 6594.9   | 6125.0   | 5653.3   |
| 996   | 2 | 351.724  | 701.433  | 2.14  | ITDLIK              | sp P01011 | 3.82E-06 | 8820.2   | 11998.7  | 9319.8   | 10705.9  | 14919.7  | 11598.5  | 3071.0   | 2947.1   | 3413.7   |
| 1107  | 2 | 954.484  | 1906.954 | 19.90 | AVLDVFEEGTEASAATAV  | sp P01011 | 0.003627 | 52170.8  | 51535.6  | 50160.2  | 76385.3  | 65840.4  | 60038.2  | 48957.8  | 46363.6  | 38625.5  |
| 1686  | 3 | 887.132  | 2658.374 | 12.16 | FNRPFMIIVPTDTQNIFFI | sp P01011 | 0.000199 | 23667.0  | 22692.4  | 23710.6  | 57806.8  | 42341.8  | 54591.8  | 34550.5  | 33478.0  | 27810.9  |
| 1821  | 3 | 405.916  | 1214.726 | 7.80  | ITLLSALVETR         | sp P01011 | 0.024085 | 4975.1   | 3728.3   | 4656.9   | 7014.4   | 5095.8   | 6436.9   | 5587.8   | 6001.0   | 4973.9   |
| 1874  | 3 | 742.381  | 2224.121 | 15.90 | GTHVDLGLASANVDFAFS  | sp P01011 | 1.95E-07 | 40512.7  | 41288.4  | 38267.3  | 61855.4  | 54285.7  | 51736.8  | 15461.9  | 16011.7  | 12753.8  |
| 2006  | 3 | 607.656  | 1819.945 | 10.72 | EQLSLLDRFTEDAKR     | sp P01011 | 8.41E-05 | 9111.7   | 10985.3  | 11085.3  | 8477.7   | 10096.3  | 9275.6   | 18976.4  | 16189.1  | 19990.1  |
| 2315  | 2 | 711.346  | 1420.677 | 14.06 | DEELSCTVVELK        | sp P01011 | 1.22E-05 | 9635.1   | 11220.0  | 9611.8   | 12866.2  | 15408.3  | 13512.7  | 4952.9   | 4522.9   | 3336.8   |
| 2840  | 4 | 544.773  | 2175.064 | 10.15 | RLYGSEAFATDFQDSAAV  | sp P01011 | 6.44E-05 | 5412.6   | 7618.0   | 7370.4   | 6247.2   | 5513.3   | 6093.9   | 13530.9  | 12646.5  | 15191.3  |
| 4316  | 2 | 1148.590 | 2295.166 | 17.90 | DYNLNDILLQLGIEEAFTS | sp P01011 | 0.010748 | 11224.8  | 9545.4   | 11028.8  | 22820.1  | 13666.9  | 15742.9  | 12011.0  | 9148.0   | 8910.6   |
| 5454  | 2 | 355.672  | 709.330  | 3.36  | FTEDAK              | sp P01011 | 0.002804 | 2797.2   | 2369.3   | 2963.9   | 3662.6   | 3034.3   | 3479.7   | 1982.4   | 1979.2   | 1769.4   |
| 5700  | 3 | 916.486  | 2746.437 | 14.91 | ITDLIKDLDSQTMMVLVN  | sp P01011 | 0.001404 | 7401.4   | 6298.3   | 7870.8   | 11231.5  | 10125.7  | 10841.1  | 10917.4  | 10414.3  | 9315.6   |
| 8214  | 4 | 665.601  | 2658.375 | 12.28 | FNRPFMIIVPTDTQNIFFI | sp P01011 | 6.09E-05 | 2140.9   | 1957.5   | 2162.1   | 4731.4   | 3775.6   | 4547.5   | 3123.3   | 3022.9   | 2602.7   |
| 11037 | 4 | 687.617  | 2746.437 | 9.79  | ITDLIKDLDSQTMMVLVN  | sp P01011 | 0.001392 | 1986.2   | 1754.3   | 2159.5   | 3063.6   | 2660.0   | 2694.6   | 2908.8   | 2716.2   | 2543.6   |
| 18606 | 3 | 766.391  | 2296.152 | 17.11 | DYNLNDILLQLGIEEAFTS | sp P01011 | 2.06E-05 | 1231.4   | 1100.3   | 1397.4   | 2351.6   | 2046.1   | 2604.2   | 952.3    | 809.4    | 906.5    |
| 19027 | 4 | 733.896  | 2931.554 | 6.83  | GKITDLIKDLDSQTMMVLN | sp P01011 | 1.87E-05 | 761.0    | 832.2    | 1033.6   | 674.9    | 568.7    | 813.8    | 3015.5   | 3124.2   | 2435.6   |
| 23935 | 3 | 1079.894 | 3236.661 | 21.44 | DYNLNDILLQLGIEEAFTS | sp P01011 | 1.47E-06 | 473.9    | 282.6    | 496.3    | 335.2    | 391.5    | 625.8    | 6492.1   | 6317.8   | 6870.0   |
| 26335 | 4 | 810.173  | 3236.662 | 12.27 | DYNLNDILLQLGIEEAFTS | sp P01011 | 4.99E-08 | 201.0    | 146.4    | 241.3    | 172.1    | 161.8    | 170.3    | 3452.7   | 2793.3   | 2895.5   |
| 2042  | 3 | 607.980  | 1820.919 | 1.47  | SLDFTELDVAAEKIDR    | sp P01019 | 0.000884 | 12772.3  | 13198.2  | 13959.8  | 9280.8   | 7944.4   | 8661.5   | 11186.0  | 10944.8  | 8205.4   |
| 3582  | 3 | 575.014  | 1722.019 | 15.11 | VLSALQAVQGLLVAQGR   | sp P01019 | 1.30E-07 | 10140.9  | 7893.8   | 9886.6   | 9099.9   | 6493.8   | 8299.7   | 660.4    | 933.6    | 826.2    |
| 3789  | 3 | 822.464  | 2464.371 | 20.22 | ADSQAQLLLSTVVGVFATA | sp P01019 | 1.78E-06 | 19535.2  | 14816.8  | 17398.1  | 14998.4  | 10668.6  | 11893.3  | 3250.0   | 3126.2   | 3618.5   |
| 4173  | 3 | 633.369  | 1897.087 | 7.23  | QPFVQGLALYTPVVLPR   | sp P01019 | 1.44E-06 | 8596.6   | 7269.5   | 9287.9   | 7096.3   | 8402.1   | 6996.3   | 2892.7   | 2898.2   | 3084.4   |
| 8584  | 4 | 1067.832 | 4267.297 | 21.51 | TIHLTMPQLVLQGSYDLQ  | sp P01019 | 0.011823 | 12172.1  | 11249.4  | 11359.6  | 11861.9  | 11080.6  | 11658.6  | 15730.4  | 13436.8  | 16970.5  |
| 8770  | 4 | 617.101  | 2464.373 | 19.38 | ADSQAQLLLSTVVGVFATA | sp P01019 | 6.00E-06 | 4157.6   | 3016.6   | 3801.5   | 3051.6   | 2318.3   | 2395.9   | 801.3    | 611.0    | 707.3    |
| 13044 | 6 | 1085.393 | 6506.314 | 4.06  | VGEVLNSIFFELEADEREI | sp P01019 | 0.000251 | 6570.5   | 7020.1   | 7637.3   | 4560.8   | 3727.8   | 4215.2   | 8429.0   | 8997.0   | 6657.8   |
| 24    | 2 | 628.326  | 1254.637 | 12.89 | AIGYLNTGYQR         | sp P01023 | 0.020008 | 472502.9 | 558501.5 | 480847.5 | 454616.8 | 468112.4 | 465249.9 | 612050.7 | 547767.0 | 683834.5 |
| 77    | 3 | 558.292  | 1671.855 | 13.06 | TEHPFTVEEFVLPK      | sp P01023 | 0.000173 | 282200.1 | 243858.1 | 298641.1 | 291417.0 | 289229.7 | 288907.9 | 195031.8 | 169468.1 | 162044.1 |
| 89    | 2 | 697.844  | 1393.673 | 17.11 | NEDSLVQVQTDK        | sp P01023 | 3.27E-07 | 412859.8 | 424119.8 | 399517.1 | 334063.7 | 402005.0 | 354129.4 | 156857.2 | 157389.6 | 145813.7 |
| 92    | 2 | 669.830  | 1337.645 | 14.06 | NALFCLESAWK         | sp P01023 | 1.96E-05 | 214528.3 | 300793.9 | 246436.1 | 226679.3 | 208845.4 | 221727.6 | 107561.8 | 113071.3 | 103667.4 |

|     |   |          |          |       |                     |           |          |          |          |          |          |          |          |          |           |          |
|-----|---|----------|----------|-------|---------------------|-----------|----------|----------|----------|----------|----------|----------|----------|----------|-----------|----------|
| 97  | 3 | 796.405  | 2386.192 | 22.17 | QQNAQGGFSSTQDTVVA   | sp P01023 | 0.017023 | 496861.3 | 521419.1 | 526125.6 | 462746.0 | 520903.0 | 438950.2 | 365735.7 | 360518.9  | 446848.9 |
| 117 | 2 | 324.216  | 646.418  | 1.40  | VIFIR               | sp P01023 | 2.08E-05 | 58698.4  | 68888.2  | 55807.5  | 60669.2  | 74612.7  | 59054.7  | 25917.6  | 24130.6   | 30265.2  |
| 129 | 2 | 523.799  | 1045.583 | 12.80 | FEVQTVPK            | sp P01023 | 2.00E-06 | 158710.5 | 181227.6 | 177421.4 | 150275.5 | 149012.5 | 145838.8 | 85581.5  | 88432.4   | 96191.1  |
| 130 | 2 | 924.944  | 1847.874 | 20.95 | QFSFPLSSEPFQGSYK    | sp P01023 | 0.000838 | 449561.7 | 544526.3 | 430636.5 | 409137.4 | 330747.4 | 409373.4 | 288905.2 | 271401.2  | 273696.0 |
| 133 | 3 | 633.966  | 1898.876 | 14.90 | FSGQLNSHGCFYQQVK    | sp P01023 | 4.43E-05 | 275374.6 | 307433.4 | 265326.5 | 297025.0 | 327314.7 | 286150.6 | 171653.2 | 180206.0  | 192780.8 |
| 134 | 2 | 574.815  | 1147.616 | 11.79 | QGIPFFGQVR          | sp P01023 | 5.12E-05 | 222644.7 | 227197.0 | 226141.5 | 232393.8 | 206036.4 | 215243.9 | 134427.5 | 149341.3  | 120806.0 |
| 143 | 2 | 503.739  | 1005.464 | 3.73  | FQVDNNNR            | sp P01023 | 9.08E-05 | 102201.5 | 91251.4  | 110804.9 | 105048.9 | 88535.5  | 106384.5 | 58261.0  | 53964.6   | 53649.2  |
| 145 | 2 | 414.733  | 827.451  | 6.76  | SDIAPVAR            | sp P01023 | 1.15E-09 | 78995.3  | 77970.3  | 77776.7  | 74954.2  | 77807.4  | 77249.8  | 27476.2  | 28746.9   | 25744.1  |
| 155 | 3 | 473.538  | 1417.593 | 4.49  | HYDGSYSTFGER        | sp P01023 | 0.010671 | 119347.3 | 110276.4 | 108682.1 | 105590.4 | 106192.1 | 105183.6 | 108330.8 | 107231.1  | 113024.0 |
| 156 | 5 | 651.924  | 3254.583 | 12.49 | YDVENCLANKVDLSFSPS  | sp P01023 | 0.000329 | 388374.7 | 444256.3 | 396036.4 | 367389.4 | 527199.0 | 367425.2 | 208543.8 | 218255.6  | 180744.3 |
| 161 | 3 | 616.966  | 1847.876 | 14.11 | QFSFPLSSEPFQGSYK    | sp P01023 | 0.005881 | 192938.9 | 227450.6 | 201626.6 | 180969.0 | 140890.8 | 164986.7 | 144752.9 | 149454.2  | 138751.7 |
| 179 | 3 | 374.217  | 1119.630 | 7.80  | SIYKPGQTVK          | sp P01023 | 0.000332 | 70468.0  | 67584.4  | 77196.2  | 83130.3  | 64716.4  | 78309.5  | 46723.5  | 40364.3   | 41008.9  |
| 180 | 3 | 704.030  | 2109.070 | 13.88 | LHTEAQIQEEGTVELTG   | sp P01023 | 2.48E-05 | 278854.8 | 402243.7 | 302608.4 | 300311.1 | 329161.1 | 333809.2 | 141494.0 | 136071.7  | 152335.5 |
| 190 | 3 | 295.192  | 882.556  | 6.28  | DLKPAIVK            | sp P01023 | 2.50E-06 | 44710.0  | 40551.5  | 43606.6  | 42591.8  | 43157.8  | 39535.9  | 23202.3  | 24999.0   | 26326.6  |
| 215 | 4 | 387.207  | 1544.797 | 10.96 | LHVVEEPTETVR        | sp P01023 | 0.004499 | 79077.9  | 100526.5 | 89276.9  | 80806.7  | 85625.1  | 86264.0  | 64508.3  | 72587.5   | 66274.5  |
| 224 | 5 | 668.504  | 3337.484 | 5.54  | SPCYGYQWVSEEHEEAH   | sp P01023 | 4.16E-06 | 271734.2 | 338801.3 | 265140.1 | 275312.4 | 266925.3 | 253461.0 | 128711.2 | 115846.7  | 109752.0 |
| 228 | 3 | 594.009  | 1779.006 | 15.90 | DTVIKPLLVEPEGLEK    | sp P01023 | 1.08E-05 | 155478.2 | 142172.7 | 154043.4 | 160210.3 | 207434.5 | 147855.3 | 54849.0  | 56517.2   | 45092.9  |
| 235 | 2 | 709.803  | 1417.592 | 14.12 | HYDGSYSTFGER        | sp P01023 | 0.049291 | 152122.7 | 161316.0 | 130470.5 | 142284.2 | 157389.4 | 142758.9 | 127211.7 | 119369.3  | 133189.1 |
| 237 | 4 | 559.226  | 2232.874 | 5.61  | KYSDASDCHGEDSQAFCS  | sp P01023 | 0.000213 | 157808.1 | 163778.2 | 147299.7 | 141761.8 | 150509.1 | 150606.1 | 114002.3 | 119992.8  | 104741.4 |
| 238 | 2 | 317.700  | 633.386  | 1.34  | VFQLK               | sp P01023 | 8.40E-06 | 38205.8  | 38675.1  | 39678.8  | 35986.3  | 42457.7  | 33734.7  | 20461.9  | 20537.4   | 20707.5  |
| 243 | 2 | 445.235  | 888.456  | 5.84  | SLNEEAVK            | sp P01023 | 0.020608 | 53764.4  | 42966.0  | 49572.8  | 44724.9  | 39447.3  | 44802.9  | 51014.9  | 42928.0   | 45714.9  |
| 244 | 2 | 383.211  | 764.408  | 3.92  | GEAFTLK             | sp P01023 | 1.07E-06 | 50895.0  | 52576.0  | 50570.3  | 48750.5  | 67907.2  | 52609.1  | 13075.6  | 13231.0   | 16307.9  |
| 247 | 3 | 539.955  | 1616.844 | 11.11 | TEVSSNHVLIYLDK      | sp P01023 | 1.94E-06 | 134068.2 | 156524.0 | 131726.6 | 128332.5 | 156185.4 | 117696.1 | 34440.2  | 36801.9   | 42784.0  |
| 251 | 3 | 362.210  | 1083.609 | 6.82  | GHFSISIPVK          | sp P01023 | 5.75E-06 | 59677.4  | 75216.5  | 64767.2  | 64175.1  | 73394.5  | 55437.4  | 20285.0  | 20638.8   | 25220.2  |
| 253 | 2 | 403.706  | 805.398  | 4.84  | GPTQEFK             | sp P01023 | 9.72E-05 | 68621.1  | 61640.9  | 75806.4  | 70455.5  | 60375.3  | 68107.8  | 38170.0  | 43244.8   | 41935.4  |
| 261 | 3 | 309.188  | 924.541  | 8.96  | TGTHGLLVK           | sp P01023 | 2.91E-06 | 40893.9  | 39784.7  | 44584.0  | 47930.5  | 40624.1  | 46608.1  | 16060.8  | 15338.6   | 16129.2  |
| 262 | 2 | 923.023  | 1844.031 | 15.90 | LLIYAVLPTGDVIGDSAK  | sp P01023 | 6.23E-06 | 293530.3 | 242787.6 | 291668.1 | 323471.2 | 225997.9 | 269729.9 | 73150.0  | 88257.8   | 72898.4  |
| 284 | 3 | 615.685  | 1844.033 | 18.11 | LLIYAVLPTGDVIGDSAK  | sp P01023 | 4.71E-05 | 150249.5 | 116923.7 | 141855.1 | 170745.3 | 110531.9 | 137579.8 | 48032.4  | 53088.4   | 47014.9  |
| 287 | 3 | 550.618  | 1648.833 | 7.48  | SSSNEEVMFLTVQVK     | sp P01023 | 0.018151 | 100613.4 | 140024.6 | 104025.5 | 80392.8  | 109521.1 | 73969.2  | 55759.4  | 55782.9   | 78531.8  |
| 290 | 3 | 522.617  | 1564.829 | 12.16 | ALLAYAFALAGNQDK     | sp P01023 | 4.39E-06 | 85941.2  | 69157.8  | 89014.6  | 90725.8  | 77303.9  | 86927.4  | 34656.9  | 34081.5   | 29641.5  |
| 300 | 4 | 513.019  | 2048.046 | 13.00 | VDLSFSPSQSLPASHAHL  | sp P01023 | 4.76E-06 | 122766.5 | 153864.2 | 122573.3 | 129315.6 | 128636.9 | 119091.9 | 40035.2  | 40109.6   | 53020.3  |
| 318 | 3 | 745.298  | 2232.872 | 16.96 | KYSDASDCHGEDSQAFCS  | sp P01023 | 1.50E-05 | 160125.0 | 163321.0 | 148169.8 | 143345.9 | 155061.4 | 155227.0 | 103120.0 | 107611.1  | 94040.3  |
| 319 | 3 | 362.865  | 1085.573 | 3.59  | SASNMAIVDK          | sp P01023 | 9.98E-08 | 47912.0  | 44884.9  | 45141.2  | 47655.3  | 43462.7  | 48251.3  | 17821.4  | 19528.0   | 20132.1  |
| 322 | 5 | 1070.761 | 5348.769 | 14.18 | DTVIKPLLVEPEGLEKETT | sp P01023 | 1.19E-06 | 679370.6 | 676385.1 | 653905.4 | 568909.9 | 497730.8 | 589035.2 | #####    | 1151941.2 | #####    |

|     |   |          |          |       |                                 |          |          |          |          |          |          |          |          |          |          |
|-----|---|----------|----------|-------|---------------------------------|----------|----------|----------|----------|----------|----------|----------|----------|----------|----------|
| 323 | 3 | 796.763  | 2387.268 | 17.90 | AYIFIDEAHITQALIWLSQLF sp P01023 | 0.00015  | 207374.2 | 179530.9 | 211225.1 | 242172.2 | 162338.4 | 194612.9 | 85216.3  | 94182.0  | 82921.2  |
| 325 | 2 | 613.280  | 1224.546 | 8.00  | YDVENCLANK sp P01023            | 1.40E-08 | 80711.2  | 76807.0  | 73131.3  | 96866.7  | 89030.9  | 81806.2  | 15133.5  | 12607.3  | 16274.5  |
| 345 | 2 | 783.421  | 1564.828 | 15.90 | ALLAYAFALAGNQDK sp P01023       | 2.95E-05 | 119931.0 | 87980.6  | 121567.9 | 131539.7 | 111313.8 | 134100.7 | 48487.6  | 45384.9  | 37761.1  |
| 363 | 4 | 1227.616 | 4906.435 | 20.84 | APVGHFYEPQAPSAEVEI sp P01023    | 0.015555 | 418969.9 | 351414.4 | 409639.6 | 480815.7 | 430644.5 | 454060.0 | 476717.2 | 410961.5 | 461237.1 |
| 367 | 4 | 820.414  | 3277.627 | 15.44 | VSVQLEASPAFLAVPVEK sp P01023    | 0.000825 | 200739.5 | 175858.7 | 233493.1 | 225222.7 | 239486.2 | 225989.2 | 157071.9 | 126341.0 | 125397.6 |
| 370 | 3 | 702.599  | 2104.774 | 18.95 | YSDASDCHGEDSQAFCE sp P01023     | 0.007323 | 149035.8 | 121276.9 | 117356.9 | 111424.8 | 105876.9 | 106266.3 | 100860.1 | 90773.8  | 79547.6  |
| 391 | 3 | 471.872  | 1412.595 | 8.67  | EQAPHICANGR sp P01023           | 6.65E-08 | 82201.8  | 69484.2  | 77640.4  | 91168.5  | 85513.7  | 86092.9  | 27587.2  | 27208.5  | 24131.4  |
| 422 | 2 | 630.291  | 1258.567 | 14.06 | VGFYESDVMGR sp P01023           | 0.036243 | 43964.5  | 50226.5  | 48628.0  | 52421.5  | 66632.7  | 58166.7  | 62310.6  | 59618.3  | 78885.6  |
| 423 | 3 | 666.371  | 1996.091 | 17.11 | LLLQQVSLPELPGEYSMK sp P01023    | 4.24E-07 | 133727.1 | 136373.6 | 116570.7 | 132083.5 | 108047.9 | 123482.4 | 27665.5  | 29581.7  | 20866.2  |
| 429 | 4 | 835.378  | 3337.481 | 15.83 | SPCYGYQWVSEEHEEA sp P01023      | 2.06E-05 | 181954.8 | 254124.5 | 165117.7 | 172731.0 | 199649.2 | 168594.3 | 66740.5  | 61281.1  | 54099.5  |
| 461 | 4 | 1040.292 | 4157.140 | 15.25 | DTVIKPLLVEPEGLEKETT sp P01023   | 7.56E-06 | 325377.9 | 223653.9 | 319073.8 | 365479.4 | 253640.6 | 308064.3 | 66405.4  | 80227.3  | 68050.3  |
| 462 | 2 | 410.712  | 819.410  | 6.31  | QSSEITR sp P01023               | 0.039906 | 91558.3  | 74806.5  | 85770.1  | 104479.7 | 72417.3  | 88125.2  | 66370.3  | 62066.8  | 82856.4  |
| 483 | 4 | 383.180  | 1528.693 | 6.55  | TAQEGDHGSHVYTK sp P01023        | 0.014693 | 97799.4  | 84107.5  | 97694.1  | 109002.9 | 93452.9  | 108784.9 | 53586.0  | 74466.5  | 52756.0  |
| 492 | 3 | 628.688  | 1883.043 | 18.11 | VSVQLEASPAFLAVPVEK sp P01023    | 7.21E-09 | 88513.3  | 71887.2  | 72298.2  | 101627.0 | 82327.9  | 98149.5  | 9091.8   | 8740.5   | 7763.7   |
| 505 | 3 | 1055.195 | 3162.562 | 18.52 | YNILPEKEEFPFALGVQTL sp P01023   | 7.27E-10 | 312793.6 | 257491.2 | 289170.0 | 385925.6 | 370176.9 | 356648.7 | 36891.8  | 33663.3  | 31137.6  |
| 543 | 2 | 605.826  | 1209.638 | 10.83 | LPPNVVEESAR sp P01023           | 3.68E-07 | 207155.7 | 255478.3 | 208627.7 | 225142.3 | 291557.7 | 226527.7 | 58485.9  | 55926.7  | 61145.8  |
| 548 | 4 | 791.648  | 3162.563 | 15.73 | YNILPEKEEFPFALGVQTL sp P01023   | 4.72E-10 | 188389.3 | 159007.3 | 180648.5 | 223799.3 | 206965.0 | 201961.3 | 22210.4  | 22310.0  | 19873.1  |
| 624 | 3 | 471.544  | 1411.611 | 9.92  | EQAPHICANGR sp P01023           | 1.79E-06 | 35579.0  | 33527.6  | 38378.7  | 32483.0  | 32566.6  | 33896.4  | 14898.7  | 13587.9  | 11462.6  |
| 676 | 3 | 451.620  | 1351.837 | 10.26 | GVPIPNKVFIR sp P01023           | 5.42E-08 | 8788.7   | 10644.9  | 9168.0   | 7848.4   | 8782.8   | 7058.8   | 60664.0  | 59529.0  | 77284.8  |
| 693 | 3 | 937.488  | 2809.442 | 16.17 | VVSMDFHPLNELIPLV sp P01023      | 0.000417 | 114023.1 | 123242.8 | 126594.2 | 173376.2 | 120800.8 | 169338.8 | 71513.3  | 75405.7  | 76055.6  |
| 700 | 3 | 419.220  | 1254.637 | 6.08  | AIGYLNTGYQR sp P01023           | 0.005949 | 18336.7  | 17930.6  | 19000.4  | 18260.5  | 16847.9  | 18521.1  | 23594.0  | 20745.5  | 25631.7  |
| 723 | 6 | 847.775  | 5080.606 | 10.99 | LLIYAVLPTGDVIGDSAKY sp P01023   | 5.75E-08 | 91620.4  | 89044.0  | 96164.6  | 65211.1  | 63660.6  | 72510.7  | 221191.3 | 251672.6 | 248983.6 |
| 734 | 2 | 836.934  | 1671.853 | 13.12 | TEHPFTVEEFVLPK sp P01023        | 2.47E-05 | 73620.1  | 59814.9  | 70423.2  | 73630.4  | 86695.9  | 74106.1  | 35385.8  | 27864.1  | 26772.5  |
| 736 | 4 | 820.168  | 3276.642 | 16.44 | VSVQLEASPAFLAVPVEK sp P01023    | 0.005301 | 100428.5 | 130615.9 | 95452.0  | 77085.9  | 94112.1  | 88652.2  | 65059.4  | 70524.2  | 66244.6  |
| 759 | 2 | 777.896  | 1553.777 | 18.11 | VTGEGCVYLQTSLK sp P01023        | 1.64E-09 | 135836.7 | 167032.0 | 140819.4 | 166533.9 | 172999.1 | 179984.2 | 28345.6  | 26275.5  | 28968.2  |
| 767 | 4 | 474.270  | 1893.051 | 8.37  | GHFSISIPVKSDIAPVAR sp P01023    | 0.000806 | 21933.8  | 35227.5  | 23398.6  | 19121.2  | 23513.7  | 17550.0  | 42783.0  | 49399.1  | 63625.3  |
| 777 | 2 | 942.528  | 1883.042 | 17.95 | VSVQLEASPAFLAVPVEK sp P01023    | 2.34E-09 | 89716.5  | 76849.6  | 72320.0  | 109517.9 | 95681.9  | 115231.2 | 8815.5   | 8302.4   | 7080.7   |
| 780 | 5 | 982.294  | 4906.435 | 16.55 | APVGHFYEPQAPSAEVEI sp P01023    | 0.019983 | 151482.1 | 125542.0 | 144976.0 | 167083.7 | 142438.4 | 153681.1 | 171649.6 | 150048.2 | 166632.2 |
| 843 | 2 | 567.796  | 1133.578 | 11.72 | SASNMAIVDK sp P01023            | 0.000106 | 21449.8  | 21398.0  | 18212.7  | 25414.4  | 36872.3  | 23794.7  | 7186.9   | 6587.6   | 10021.1  |
| 888 | 3 | 574.651  | 1720.930 | 11.25 | ALLAYAFALAGNQDKR sp P01023      | 2.26E-05 | 46032.8  | 33587.6  | 32338.7  | 40795.3  | 29521.7  | 36408.8  | 11954.9  | 11267.3  | 10104.6  |
| 899 | 3 | 790.728  | 2369.164 | 12.16 | QQNAQGGFSSTQDTVVA sp P01023     | 2.39E-07 | 65925.7  | 60474.5  | 60178.4  | 67827.5  | 63450.2  | 66957.0  | 25734.3  | 28995.5  | 28201.8  |
| 966 | 4 | 814.653  | 3254.582 | 16.49 | YDVENCLANKVDSLFSFSPS sp P01023  | 0.001846 | 86740.0  | 118267.7 | 89953.7  | 71070.6  | 147756.9 | 80549.8  | 38763.5  | 39444.5  | 27856.4  |
| 977 | 2 | 560.822  | 1119.630 | 11.28 | SIYKPGQTVK sp P01023            | 2.49E-05 | 22572.2  | 22302.6  | 24230.6  | 26988.0  | 26235.5  | 27175.2  | 12230.8  | 10123.3  | 11224.4  |
| 980 | 3 | 799.722  | 2396.145 | 19.38 | ETTFNSLLCPSGGEVSEE sp P01023    | 7.13E-08 | 77287.5  | 68578.7  | 73527.2  | 104091.8 | 84323.9  | 104931.6 | 21565.2  | 18450.9  | 17758.2  |

|      |   |         |          |       |                      |           |          |         |         |         |         |         |         |         |         |         |
|------|---|---------|----------|-------|----------------------|-----------|----------|---------|---------|---------|---------|---------|---------|---------|---------|---------|
| 1006 | 4 | 619.562 | 2474.220 | 17.38 | SLFTDLEAENDVLHC VAF  | sp P01023 | 0.049453 | 45813.7 | 35253.3 | 39613.3 | 38731.8 | 26555.8 | 33015.3 | 29205.3 | 30282.0 | 27336.5 |
| 1041 | 3 | 691.982 | 2072.925 | 14.95 | MCPQLQQYEMHGPEGLF    | sp P01023 | 0.003909 | 35969.0 | 43534.8 | 43598.9 | 49014.5 | 54387.4 | 52297.7 | 52451.1 | 53395.2 | 54635.3 |
| 1069 | 3 | 634.294 | 1899.861 | 14.90 | FSGQLNSHGCFYQQVK     | sp P01023 | 0.004493 | 43301.0 | 37808.6 | 36898.7 | 39434.9 | 51164.4 | 37253.3 | 24235.4 | 20734.7 | 29070.6 |
| 1104 | 2 | 624.840 | 1247.665 | 12.79 | LSFYLLIMAK           | sp P01023 | 4.46E-08 | 22724.5 | 22102.3 | 26096.2 | 31527.6 | 27794.1 | 32572.4 | 7234.1  | 7991.1  | 8151.2  |
| 1117 | 3 | 446.889 | 1337.645 | 5.75  | NALFCLESAWK          | sp P01023 | 9.96E-06 | 11882.3 | 13066.5 | 14728.0 | 12314.6 | 10579.8 | 11397.7 | 5618.7  | 6152.5  | 5276.8  |
| 1125 | 4 | 820.414 | 3277.627 | 15.44 | VSVQLEASPAFLAVPVEK   | sp P01023 | 0.000467 | 52570.3 | 54814.3 | 54357.4 | 48845.2 | 45912.7 | 54583.9 | 38337.3 | 41096.5 | 33683.8 |
| 1197 | 3 | 515.939 | 1544.797 | 13.17 | LHVVEEPTHTVTR        | sp P01023 | 0.004916 | 20549.5 | 30073.4 | 22975.0 | 20798.0 | 26279.0 | 22790.4 | 14757.3 | 16666.4 | 15241.4 |
| 1205 | 3 | 465.565 | 1393.674 | 8.02  | NEDSLVVFQTDK         | sp P01023 | 5.79E-05 | 19369.6 | 20733.5 | 20005.4 | 16882.4 | 18551.1 | 17369.2 | 9006.9  | 8460.0  | 6188.9  |
| 1214 | 2 | 566.302 | 1130.589 | 7.28  | QGIPFFGQVR           | sp P01023 | 4.67E-07 | 21870.2 | 24304.6 | 21640.4 | 23543.2 | 21126.2 | 25749.3 | 10006.2 | 10318.4 | 9437.2  |
| 1252 | 4 | 508.265 | 2029.031 | 4.36  | SGGRTEHPFTVEEFVLPK   | sp P01023 | 1.29E-06 | 7866.0  | 10068.0 | 8414.4  | 5028.0  | 6868.7  | 5473.3  | 44357.8 | 45260.7 | 72199.9 |
| 1257 | 3 | 510.571 | 1528.692 | 8.37  | TAQEGDHGSHVYTK       | sp P01023 | 0.012117 | 54392.7 | 44428.7 | 52795.5 | 60031.9 | 52137.6 | 58850.0 | 17590.6 | 38414.1 | 19052.0 |
| 1305 | 4 | 597.824 | 2387.269 | 12.89 | AYIFIDEAHITQALIWLSQF | sp P01023 | 8.12E-05 | 32458.4 | 26265.4 | 34711.1 | 39151.1 | 26006.8 | 31303.5 | 12469.0 | 12793.0 | 12386.8 |
| 1307 | 2 | 849.425 | 1696.836 | 15.90 | SSSNEEVMFLTVQVK      | sp P01023 | 2.64E-06 | 40272.0 | 40711.8 | 47150.8 | 57818.6 | 54381.0 | 60960.8 | 28257.9 | 28242.9 | 25044.4 |
| 1343 | 3 | 682.373 | 2044.096 | 17.11 | LLLQQVSLPELPGEYSMK   | sp P01023 | 7.15E-08 | 31799.5 | 27789.0 | 30507.6 | 51837.1 | 44895.0 | 55081.7 | 10577.5 | 10450.8 | 8735.8  |
| 1350 | 2 | 504.715 | 1007.415 | 3.65  | QKDNGCFR             | sp P01023 | 0.001025 | 13126.8 | 14038.6 | 14177.6 | 16493.7 | 15105.6 | 15230.5 | 11477.6 | 11368.1 | 9483.5  |
| 1428 | 3 | 349.535 | 1045.583 | 5.04  | FEVQVTPK             | sp P01023 | 3.62E-06 | 8376.9  | 8478.9  | 9151.1  | 7544.2  | 8033.3  | 7920.7  | 4365.9  | 4275.7  | 5004.5  |
| 1454 | 4 | 597.556 | 2386.193 | 12.28 | QQNAQGGFSSTQD TVVA   | sp P01023 | 0.005939 | 24328.2 | 24587.5 | 26646.3 | 24757.4 | 24602.1 | 21501.2 | 16236.2 | 17255.6 | 19545.0 |
| 1478 | 2 | 916.432 | 1830.849 | 19.90 | QFSFPLSSEPFQGSYK     | sp P01023 | 0.000395 | 50684.7 | 42979.6 | 47112.3 | 54410.7 | 48442.0 | 51632.1 | 25035.5 | 29922.3 | 18820.5 |
| 1505 | 2 | 809.428 | 1616.842 | 14.17 | TEVSSNHVLIYLDK       | sp P01023 | 5.03E-05 | 38964.6 | 53112.1 | 34934.2 | 32079.7 | 54892.4 | 31948.2 | 8099.4  | 8897.8  | 11964.1 |
| 1521 | 4 | 703.368 | 2809.442 | 11.29 | VVSMDFHPLNELIPLV     | sp P01023 | 2.67E-05 | 31306.7 | 31822.4 | 34455.5 | 45669.4 | 37031.2 | 48232.3 | 19974.1 | 20861.2 | 20057.5 |
| 1524 | 4 | 814.411 | 3253.615 | 19.44 | QQNAQGGFSSTQD TVVA   | sp P01023 | 4.18E-05 | 40948.0 | 47159.4 | 37080.8 | 25114.2 | 20126.0 | 21698.6 | 48228.9 | 48239.1 | 42102.0 |
| 1526 | 2 | 950.445 | 1898.876 | 12.95 | FSGQLNSHGCFYQQVK     | sp P01023 | 0.000337 | 33394.6 | 50273.6 | 30002.3 | 47543.1 | 55439.6 | 45201.3 | 16789.8 | 15539.0 | 20625.0 |
| 1555 | 4 | 691.366 | 2761.436 | 8.12  | VVSMDFHPLNELIPLV     | sp P01023 | 0.000315 | 36728.4 | 35914.3 | 44950.0 | 39347.0 | 31140.3 | 36423.0 | 17465.9 | 20886.0 | 14115.8 |
| 1564 | 3 | 721.733 | 2162.178 | 13.10 | VSNQTLSLFFTVLQDVPV   | sp P01023 | 1.06E-06 | 31602.4 | 38563.1 | 32474.4 | 35898.5 | 34231.3 | 37814.6 | 9492.6  | 10058.5 | 7233.2  |
| 1572 | 4 | 779.160 | 3112.613 | 11.44 | FRVVSMDENFHPLNELIP   | sp P01023 | 4.31E-05 | 29857.5 | 21956.0 | 27535.0 | 30588.3 | 24586.1 | 31346.3 | 63606.3 | 59446.4 | 53655.4 |
| 1589 | 3 | 342.488 | 1024.441 | 4.15  | QKDNGCFR             | sp P01023 | 0.014574 | 18558.5 | 14435.7 | 16122.7 | 19964.8 | 15250.1 | 17529.6 | 16067.4 | 17377.6 | 18567.1 |
| 1649 | 3 | 451.551 | 1351.632 | 6.38  | DMYSFLEDMGLK         | sp P01023 | 7.06E-07 | 12373.8 | 14362.5 | 12083.4 | 13409.8 | 15731.1 | 14199.2 | 4091.1  | 3287.7  | 4398.8  |
| 1668 | 3 | 400.894 | 1199.661 | 5.27  | LSFYLLIMAK           | sp P01023 | 2.60E-06 | 13016.8 | 16005.6 | 12766.7 | 10832.9 | 14328.6 | 11992.2 | 3537.5  | 4052.5  | 3469.1  |
| 1721 | 3 | 566.620 | 1696.839 | 9.71  | SSSNEEVMFLTVQVK      | sp P01023 | 2.86E-05 | 15581.9 | 14942.2 | 18186.2 | 22901.5 | 19725.0 | 22676.3 | 12140.2 | 12150.4 | 12195.9 |
| 1783 | 3 | 443.593 | 1327.756 | 6.00  | KLSFYLLIMAK          | sp P01023 | 2.76E-05 | 12966.3 | 21263.3 | 13607.7 | 12145.7 | 16368.6 | 12634.7 | 3494.4  | 3157.4  | 4115.6  |
| 1793 | 2 | 463.277 | 924.540  | 9.50  | TGTHGLLVK            | sp P01023 | 3.30E-06 | 8872.4  | 9185.5  | 10059.9 | 11095.7 | 10998.1 | 11325.2 | 2615.1  | 2485.9  | 2751.2  |
| 1795 | 4 | 675.864 | 2699.426 | 14.91 | TEHPFTVEEFVLPKFEVQ   | sp P01023 | 4.34E-08 | 7993.2  | 7237.7  | 8200.2  | 4467.8  | 3719.3  | 3587.5  | 49564.2 | 64167.9 | 40021.2 |
| 1828 | 2 | 402.199 | 802.384  | 4.61  | QSSEITR              | sp P01023 | 6.04E-06 | 5484.9  | 5549.1  | 5405.9  | 6787.3  | 6247.7  | 6946.6  | 3519.6  | 3184.8  | 2748.0  |
| 1833 | 4 | 419.230 | 1672.891 | 3.47  | LHVVEEPTHTVTRK       | sp P01023 | 0.023599 | 13018.3 | 11144.5 | 12861.3 | 10931.1 | 13592.1 | 10701.6 | 10262.0 | 9585.0  | 9804.4  |

|      |   |          |          |       |                       |           |          |          |          |          |          |          |          |          |          |          |
|------|---|----------|----------|-------|-----------------------|-----------|----------|----------|----------|----------|----------|----------|----------|----------|----------|----------|
| 1867 | 3 | 459.594  | 1375.760 | 3.31  | KLSFYLLIMAK           | sp P01023 | 5.27E-06 | 11344.4  | 7356.2   | 10090.7  | 14099.2  | 10699.5  | 13007.7  | 2312.7   | 2741.1   | 2845.1   |
| 1904 | 3 | 764.335  | 2289.984 | 18.11 | DLTGFPGLNDQDNEDC      | sp P01023 | 1.79E-06 | 31043.5  | 36830.1  | 31014.1  | 36684.0  | 29100.8  | 34530.4  | 12007.5  | 12699.7  | 10703.4  |
| 1949 | 2 | 543.794  | 1085.573 | 7.77  | SASNMAIVDK            | sp P01023 | 5.41E-09 | 12981.7  | 12603.8  | 11975.9  | 12882.2  | 12560.2  | 13107.1  | 4114.3   | 3977.1   | 4039.9   |
| 1988 | 2 | 765.354  | 1528.693 | 14.91 | TAQEGDHGSHVYTK        | sp P01023 | 0.014772 | 49354.1  | 43519.6  | 48066.9  | 59985.6  | 52601.7  | 66098.1  | 34222.1  | 28470.6  | 28169.9  |
| 1996 | 6 | 818.747  | 4906.436 | 15.42 | APVGHFYEPQAPSAEVEI    | sp P01023 | 0.030029 | 43475.6  | 35799.9  | 41393.8  | 47073.8  | 39926.4  | 44659.6  | 48082.7  | 41763.9  | 44813.7  |
| 2021 | 2 | 504.223  | 1006.431 | 3.36  | KKDNGCFR              | sp P01023 | 0.010389 | 8032.8   | 7254.6   | 8435.1   | 8608.9   | 7719.6   | 8339.0   | 6402.7   | 6775.0   | 5151.0   |
| 2083 | 4 | 897.950  | 3587.771 | 19.05 | ETTFNSLLCPSGGEVSEE    | sp P01023 | 3.94E-06 | 106152.9 | 85165.2  | 94846.0  | 107936.0 | 86672.9  | 99577.4  | 34796.1  | 33732.8  | 28487.1  |
| 2099 | 3 | 713.025  | 2136.052 | 12.95 | HNVIYINGITYTPVSSSTNEK | sp P01023 | 5.34E-05 | 25099.9  | 27608.4  | 22027.6  | 25376.1  | 29926.3  | 23069.8  | 8483.6   | 6620.1   | 10818.3  |
| 2114 | 5 | 832.435  | 4157.141 | 17.46 | DTVIKPLLVEPEGLEKETT   | sp P01023 | 6.57E-06 | 48048.2  | 30150.4  | 43946.1  | 49560.8  | 36040.9  | 46248.6  | 8532.0   | 9756.8   | 8936.4   |
| 2196 | 2 | 890.509  | 1779.004 | 16.01 | DTVIKPLLVEPEGLEK      | sp P01023 | 4.65E-05 | 29719.7  | 25739.7  | 25323.0  | 26403.3  | 49630.8  | 29514.0  | 7284.8   | 7823.3   | 5572.3   |
| 2233 | 4 | 763.650  | 3050.571 | 18.29 | LLIYAVLPTGDVIGDSAKY   | sp P01023 | 7.50E-05 | 31415.8  | 26204.3  | 27939.4  | 29060.9  | 23035.9  | 29994.9  | 14347.9  | 12655.6  | 10871.4  |
| 2236 | 4 | 528.276  | 2109.073 | 8.11  | LHTEAQIQEEGTVVELTG    | sp P01023 | 0.000134 | 12137.4  | 16098.1  | 14187.0  | 12768.4  | 12834.9  | 14374.3  | 8709.8   | 8810.0   | 8698.3   |
| 2258 | 1 | 803.390  | 802.383  | 1.46  | QSSEITR               | sp P01023 | 0.000147 | 12119.9  | 16268.4  | 11071.7  | 12622.8  | 17159.8  | 14157.4  | 5948.4   | 6132.0   | 5455.7   |
| 2309 | 5 | 1038.706 | 5188.493 | 16.02 | AVDQSVLLMKPDAELSA     | sp P01023 | 1.47E-06 | 57823.8  | 45665.1  | 52746.8  | 83372.8  | 103092.6 | 85170.9  | 19386.9  | 16695.0  | 13201.0  |
| 2334 | 5 | 858.054  | 4285.232 | 6.31  | KDTVIKPLLVEPEGLEKET   | sp P01023 | 2.93E-07 | 42345.6  | 39302.2  | 31730.6  | 43830.4  | 36904.5  | 39397.1  | 8468.7   | 9510.2   | 7546.6   |
| 2346 | 3 | 1196.931 | 3587.770 | 17.83 | ETTFNSLLCPSGGEVSEE    | sp P01023 | 1.08E-06 | 146680.6 | 121053.7 | 139007.3 | 148975.4 | 128909.2 | 141184.2 | 43928.0  | 44113.3  | 34185.9  |
| 2381 | 6 | 892.469  | 5348.768 | 13.39 | DTVIKPLLVEPEGLEKETT   | sp P01023 | 7.57E-07 | 64660.6  | 63169.7  | 60534.6  | 54472.6  | 46480.5  | 52913.2  | 105472.7 | 109034.5 | 100507.6 |
| 2534 | 5 | 613.929  | 3064.609 | 4.54  | FRVVSMDENFHPLNELIP    | sp P01023 | 0.000188 | 18703.8  | 14872.8  | 15998.2  | 12968.0  | 11299.4  | 14207.2  | 24869.7  | 23953.5  | 24251.5  |
| 2622 | 1 | 1099.579 | 1098.572 | 5.57  | QTVSWAVTPK            | sp P01023 | 0.014245 | 12277.3  | 18354.3  | 15923.6  | 15991.2  | 27121.0  | 18072.1  | 15046.9  | 13776.9  | 13478.8  |
| 2745 | 4 | 624.831  | 2495.296 | 4.25  | NEDSLVVFQTDKSIYKPG    | sp P01023 | 7.68E-08 | 7769.1   | 9958.8   | 8957.9   | 4538.3   | 5811.3   | 4982.8   | 29907.7  | 30742.9  | 32121.3  |
| 2755 | 3 | 383.546  | 1147.616 | 6.71  | QGIPFFGQVR            | sp P01023 | 0.001314 | 5913.4   | 5004.6   | 5702.8   | 5662.7   | 4332.6   | 5115.7   | 3514.7   | 3212.6   | 2937.3   |
| 2907 | 3 | 632.024  | 1893.050 | 14.70 | GHFSISIPVKSDIAPVAR    | sp P01023 | 0.004079 | 7273.7   | 13468.4  | 6588.4   | 5342.4   | 8092.4   | 5580.8   | 14197.6  | 16637.4  | 21897.9  |
| 2949 | 2 | 1238.116 | 2474.217 | 15.22 | SLFTDLEAENDVLHCVAF    | sp P01023 | 0.005765 | 44764.5  | 32375.8  | 31741.5  | 40642.4  | 24569.3  | 32682.7  | 17560.9  | 20336.2  | 18455.3  |
| 3088 | 6 | 543.438  | 3254.585 | 8.57  | YDVENCLANKVDLSFSPS    | sp P01023 | 3.56E-05 | 12803.0  | 14961.6  | 12824.4  | 11699.0  | 16678.6  | 11860.4  | 5554.3   | 6068.4   | 5372.0   |
| 3154 | 2 | 707.305  | 1412.595 | 14.12 | EQAPHICANGR           | sp P01023 | 7.37E-09 | 15003.8  | 14213.8  | 13760.0  | 18051.2  | 22069.8  | 17270.4  | 3344.7   | 3262.0   | 3231.9   |
| 3387 | 3 | 441.240  | 1320.699 | 7.75  | PVPGHVTVSICR          | sp P01023 | 7.06E-08 | 6563.6   | 8212.2   | 6923.8   | 7908.8   | 9857.2   | 8174.1   | 1195.1   | 1127.4   | 1321.9   |
| 3405 | 2 | 339.697  | 677.379  | 3.22  | TTVMVK                | sp P01023 | 0.010167 | 5945.8   | 5046.6   | 5968.6   | 7988.3   | 6487.3   | 8419.1   | 3822.0   | 4016.5   | 4348.4   |
| 3448 | 4 | 377.958  | 1507.802 | 2.30  | TGTHGLLVKQEDMK        | sp P01023 | 0.000176 | 11461.7  | 9092.4   | 11381.6  | 8801.1   | 7153.4   | 9226.2   | 20374.3  | 19721.3  | 22904.7  |
| 3629 | 4 | 1298.131 | 5188.494 | 19.81 | AVDQSVLLMKPDAELSA     | sp P01023 | 1.29E-05 | 37632.0  | 27797.3  | 32337.5  | 57748.8  | 78032.2  | 54583.2  | 12577.9  | 8934.6   | 7248.1   |
| 3661 | 4 | 963.002  | 3847.977 | 16.30 | KYFPETWIWDLVVVNSA     | sp P01023 | 0.000314 | 59046.0  | 54805.5  | 66971.1  | 56845.3  | 54584.4  | 58682.8  | 37044.8  | 40168.2  | 35724.8  |
| 3691 | 5 | 1017.128 | 5080.603 | 5.72  | LLIYAVLPTGDVIGDSAKY   | sp P01023 | 7.94E-05 | 16412.4  | 20938.5  | 14706.3  | 8927.5   | 15196.3  | 14089.0  | 45411.7  | 52035.7  | 43414.5  |
| 3880 | 2 | 513.228  | 1024.441 | 1.38  | KKDNGCFR              | sp P01023 | 0.046617 | 11198.7  | 8007.4   | 7543.2   | 12477.2  | 9181.7   | 10020.2  | 9245.4   | 8335.0   | 12021.2  |
| 3959 | 4 | 1338.199 | 5348.766 | 16.23 | DTVIKPLLVEPEGLEKETT   | sp P01023 | 2.42E-05 | 45984.3  | 50225.5  | 47327.8  | 44471.7  | 38134.3  | 46629.2  | 81985.3  | 79319.5  | 74923.0  |
| 4244 | 4 | 859.433  | 3433.704 | 12.70 | IAQWQSFQLEGGLKQFSI    | sp P01023 | 5.95E-07 | 9100.9   | 8178.4   | 6482.1   | 5810.8   | 5021.3   | 5427.6   | 22810.1  | 26739.6  | 25117.8  |

|       |   |          |          |       |                                 |          |          |          |          |          |          |          |          |          |          |
|-------|---|----------|----------|-------|---------------------------------|----------|----------|----------|----------|----------|----------|----------|----------|----------|----------|
| 4365  | 4 | 892.673  | 3566.664 | 18.44 | HNVIYINGITYTPVSSSTNEK sp P01023 | 2.04E-06 | 13780.5  | 10068.4  | 13146.3  | 25857.3  | 21486.7  | 31682.1  | 4702.2   | 4147.5   | 3909.7   |
| 5294  | 5 | 612.328  | 3056.603 | 7.02  | SGGRTEHPFTVEEFVLPK sp P01023    | 7.72E-11 | 781.9    | 624.2    | 646.5    | 229.0    | 241.7    | 188.3    | 20146.9  | 20400.5  | 19478.6  |
| 5516  | 6 | 579.451  | 3470.659 | 1.32  | HNVIYINGITYTPVSSSTNEK sp P01023 | 1.89E-06 | 6946.9   | 9466.8   | 7156.4   | 7212.1   | 8713.1   | 8023.9   | 1962.6   | 1697.3   | 2027.5   |
| 6297  | 3 | 1636.484 | 4906.431 | 11.76 | APVGHFYEPQAPSAEVEI sp P01023    | 0.015981 | 24699.9  | 21709.3  | 26873.9  | 31530.8  | 25106.7  | 30270.6  | 28538.7  | 27323.8  | 26718.3  |
| 6507  | 6 | 896.801  | 5374.761 | 5.73  | LHVVEEPTHTVTRKYFPE sp P01023    | 1.90E-08 | 9786.1   | 9832.3   | 9414.3   | 5192.2   | 4144.7   | 5515.8   | 32046.6  | 34747.1  | 33891.2  |
| 6798  | 6 | 771.933  | 4625.553 | 14.09 | TEVSSNHVLIYLDKVSNQ sp P01023    | 5.90E-09 | 8870.3   | 8166.0   | 8394.8   | 5105.9   | 4983.2   | 5143.7   | 17879.6  | 20232.6  | 20233.8  |
| 7293  | 3 | 611.291  | 1830.850 | 15.11 | QFSFPLSSEPFQGSYK sp P01023      | 0.004802 | 3525.3   | 3025.4   | 4242.5   | 4174.2   | 3439.1   | 3588.6   | 1887.9   | 2657.0   | 1697.8   |
| 7574  | 4 | 1073.347 | 4289.358 | 20.97 | SSGSLLNNAIKGGVEDEV sp P01023    | 5.39E-09 | 7440.2   | 7748.3   | 8445.4   | 4507.3   | 3592.2   | 3891.7   | 37783.5  | 38319.0  | 33811.6  |
| 7606  | 2 | 724.827  | 1447.639 | 16.06 | DMYSFLEDMGLK sp P01023          | 2.65E-05 | 2308.5   | 1617.8   | 2195.2   | 4577.3   | 3796.2   | 5067.4   | 1361.4   | 1287.3   | 1123.8   |
| 7954  | 3 | 885.498  | 2653.473 | 12.57 | SDIAPVARLLIYAVLPTGD sp P01023   | 5.66E-08 | 8791.3   | 8326.5   | 9585.0   | 7102.9   | 7333.5   | 7540.6   | 1915.0   | 1395.2   | 1640.5   |
| 8299  | 3 | 931.157  | 2790.451 | 11.90 | AFQPPFFVELTMPYSVIRG sp P01023   | 1.75E-06 | 3208.0   | 4283.6   | 3503.1   | 4006.0   | 2955.1   | 3377.3   | 10390.2  | 11221.5  | 10693.5  |
| 8405  | 3 | 1145.574 | 3433.701 | 21.44 | IAQWQSFQLEGGLKQFSI sp P01023    | 1.24E-05 | 5865.3   | 5807.2   | 3860.5   | 4202.7   | 3390.3   | 3268.1   | 15789.8  | 17626.9  | 15733.5  |
| 9134  | 3 | 1283.666 | 3847.975 | 14.09 | KYFPETWIWDLVVVNSA sp P01023     | 8.00E-05 | 24307.5  | 22156.9  | 26931.0  | 24699.5  | 23336.2  | 25042.4  | 13977.2  | 16248.4  | 13637.4  |
| 9781  | 4 | 541.552  | 2162.178 | 12.44 | VSNQTLSLFFTVLQDVPV sp P01023    | 2.71E-07 | 2017.0   | 2431.8   | 2148.7   | 2363.2   | 2328.0   | 2426.2   | 612.8    | 553.5    | 468.4    |
| 9979  | 4 | 757.688  | 3026.722 | 14.52 | VSNQTLSLFFTVLQDVPV sp P01023    | 2.34E-08 | 1680.2   | 1675.0   | 1890.7   | 986.2    | 845.1    | 969.0    | 5121.8   | 5284.7   | 5452.9   |
| 10891 | 2 | 1082.095 | 2162.176 | 17.90 | VSNQTLSLFFTVLQDVPV sp P01023    | 2.23E-05 | 4603.5   | 6091.1   | 5108.4   | 5459.7   | 5300.6   | 6157.5   | 1080.0   | 1480.1   | 739.7    |
| 11196 | 6 | 1301.493 | 7802.913 | 9.58  | APVGHFYEPQAPSAEVEI sp P01023    | 1.44E-06 | 8449.5   | 12359.8  | 9694.1   | 4519.1   | 4858.5   | 5566.8   | 37346.8  | 50196.1  | 39277.4  |
| 11931 | 4 | 941.260  | 3761.009 | 7.07  | TEVSSNHVLIYLDKVSNQ sp P01023    | 0.006296 | 5762.6   | 7424.9   | 4659.7   | 3837.2   | 3085.2   | 2841.9   | 3805.8   | 4168.5   | 4035.7   |
| 12835 | 5 | 770.603  | 3847.978 | 14.58 | KYFPETWIWDLVVVNSA sp P01023     | 0.001699 | 6752.2   | 6351.0   | 8054.5   | 6360.4   | 5839.7   | 6571.8   | 4191.0   | 4551.1   | 3856.7   |
| 13692 | 5 | 1087.955 | 5434.737 | 15.26 | APVGHFYEPQAPSAEVEI sp P01023    | 1.20E-08 | 2545.6   | 2461.5   | 3065.2   | 1352.5   | 1153.6   | 1312.6   | 18728.6  | 17650.3  | 17854.0  |
| 14561 | 5 | 858.879  | 4289.360 | 16.18 | SSGSLLNNAIKGGVEDEV sp P01023    | 1.77E-08 | 1862.6   | 1772.0   | 2036.4   | 929.5    | 724.6    | 917.2    | 9748.5   | 9968.3   | 9283.9   |
| 14593 | 5 | 926.118  | 4625.552 | 16.15 | TEVSSNHVLIYLDKVSNQ sp P01023    | 3.78E-07 | 3648.7   | 3767.1   | 3465.7   | 1967.4   | 2260.4   | 2082.7   | 8529.5   | 8471.4   | 7515.5   |
| 17370 | 4 | 948.514  | 3790.025 | 6.80  | AFQPPFFVELTMPYSVIRG sp P01023   | 0.00304  | 3652.0   | 3622.1   | 4040.8   | 2945.0   | 2292.6   | 2449.0   | 3536.3   | 2896.5   | 3492.3   |
| 19873 | 4 | 1359.692 | 5434.739 | 6.78  | APVGHFYEPQAPSAEVEI sp P01023    | 1.86E-09 | 1559.6   | 1852.6   | 1516.9   | 983.7    | 857.4    | 816.5    | 13710.4  | 14256.0  | 14052.5  |
| 24252 | 6 | 715.901  | 4289.361 | 15.45 | SSGSLLNNAIKGGVEDEV sp P01023    | 3.46E-09 | 617.9    | 546.8    | 517.0    | 237.0    | 223.5    | 266.4    | 3502.6   | 3322.4   | 3013.8   |
| 24315 | 5 | 753.209  | 3761.011 | 7.73  | TEVSSNHVLIYLDKVSNQ sp P01023    | 0.004577 | 1312.5   | 1555.8   | 1047.6   | 875.4    | 672.3    | 606.5    | 720.9    | 856.2    | 795.4    |
| 30917 | 6 | 627.842  | 3761.011 | 6.90  | TEVSSNHVLIYLDKVSNQ sp P01023    | 0.007649 | 543.5    | 689.7    | 430.1    | 311.1    | 346.5    | 272.9    | 367.2    | 475.1    | 395.6    |
| 35516 | 3 | 722.061  | 2163.162 | 8.32  | VSNQTLSLFFTVLQDVPV sp P01023    | 8.76E-05 | 254.5    | 240.5    | 203.2    | 403.3    | 273.8    | 285.4    | 75.1     | 66.7     | 34.8     |
| 273   | 3 | 733.383  | 2197.126 | 12.43 | VPVAVQGEDTVQSLTQG sp P01024     | 0.001397 | 149569.1 | 118739.5 | 145572.6 | 181907.8 | 249680.3 | 208037.7 | 105018.5 | 123630.5 | 91657.4  |
| 283   | 2 | 645.308  | 1288.602 | 16.11 | SGSDEVQVGQQR sp P01024          | 1.03E-06 | 72620.6  | 65407.2  | 67809.3  | 106258.6 | 112654.0 | 101894.6 | 69766.7  | 67120.4  | 70495.4  |
| 313   | 2 | 444.746  | 887.477  | 4.00  | IWDVVEK sp P01024               | 1.03E-06 | 33964.1  | 34706.1  | 35136.7  | 41840.4  | 47709.8  | 38426.5  | 38615.7  | 36017.4  | 42319.1  |
| 347   | 3 | 596.662  | 1786.965 | 11.52 | SGIPIVTSPYQIHFTK sp P01024      | 0.020642 | 75869.2  | 69177.4  | 88801.4  | 94294.0  | 107358.0 | 94085.3  | 107469.9 | 107984.8 | 101182.2 |
| 372   | 3 | 397.867  | 1190.579 | 7.46  | SDDKVTLLEER sp P01024           | 0.000303 | 28720.4  | 24097.3  | 25457.5  | 37664.7  | 40015.1  | 34680.5  | 26940.6  | 24438.2  | 28349.5  |
| 412   | 2 | 403.245  | 804.476  | 7.59  | TFISPIK sp P01024               | 0.037616 | 20685.0  | 23661.0  | 21161.2  | 23012.2  | 25708.7  | 25604.0  | 24629.0  | 24997.8  | 26081.3  |

|      |   |         |          |       |                    |           |          |         |         |         |         |         |         |         |         |         |
|------|---|---------|----------|-------|--------------------|-----------|----------|---------|---------|---------|---------|---------|---------|---------|---------|---------|
| 497  | 3 | 374.512 | 1120.514 | 3.65  | LCRDELCR           | sp P01024 | 0.000484 | 14144.7 | 12217.4 | 15782.5 | 17897.5 | 14688.6 | 18040.9 | 26527.4 | 25335.4 | 24353.0 |
| 552  | 2 | 701.422 | 1400.830 | 14.06 | SSLSVPYVIVPLK      | sp P01024 | 7.72E-05 | 57675.3 | 61182.6 | 53120.5 | 80068.8 | 57117.5 | 69824.9 | 31378.8 | 31446.9 | 33033.6 |
| 601  | 3 | 606.304 | 1815.889 | 15.11 | SNLDEDIIAEENIVSR   | sp P01024 | 0.012798 | 38990.9 | 35633.1 | 41787.5 | 40819.6 | 41483.9 | 43522.8 | 47257.5 | 45035.7 | 43789.6 |
| 615  | 3 | 620.304 | 1857.889 | 4.20  | VFLDCCNYITELRR     | sp P01024 | 0.026115 | 43249.3 | 43235.4 | 43721.2 | 46037.6 | 59645.0 | 51427.6 | 76809.6 | 67346.8 | 50539.8 |
| 652  | 2 | 650.798 | 1299.581 | 11.10 | ACEPGVDYVYK        | sp P01024 | 0.000147 | 42247.7 | 43371.4 | 35215.1 | 46713.8 | 60447.7 | 51578.0 | 24822.1 | 23325.7 | 27983.5 |
| 667  | 3 | 624.684 | 1871.030 | 11.95 | TELRPGETLNVNFLLR   | sp P01024 | 0.000137 | 45168.7 | 40664.6 | 50530.9 | 61230.4 | 51202.3 | 59079.3 | 26535.8 | 26204.6 | 27763.1 |
| 714  | 2 | 421.772 | 841.529  | 6.40  | VVLVAVDK           | sp P01024 | 0.003411 | 14745.4 | 18433.4 | 14984.6 | 17403.8 | 26601.1 | 18972.8 | 11759.5 | 10844.4 | 10793.4 |
| 779  | 3 | 504.613 | 1510.818 | 14.27 | LVAYYTLIGASGQR     | sp P01024 | 0.000108 | 20492.9 | 19318.2 | 20094.4 | 28536.4 | 27175.0 | 26337.8 | 20815.9 | 18147.3 | 17907.5 |
| 798  | 2 | 402.727 | 803.440  | 5.85  | SVQLTEK            | sp P01024 | 0.000306 | 14475.0 | 13002.0 | 14004.0 | 15800.2 | 14954.1 | 17367.1 | 20376.1 | 22322.6 | 22822.6 |
| 800  | 3 | 384.875 | 1151.603 | 6.56  | FISLGEACKK         | sp P01024 | 0.042322 | 14292.1 | 17619.2 | 13682.7 | 16778.5 | 18275.3 | 16422.0 | 19047.7 | 18059.5 | 19030.8 |
| 810  | 2 | 570.275 | 1138.535 | 6.36  | FYYIYNEK           | sp P01024 | 9.18E-08 | 24006.4 | 29880.7 | 25381.4 | 36368.2 | 38699.9 | 38834.6 | 8322.5  | 8671.3  | 9951.2  |
| 834  | 2 | 365.691 | 729.367  | 3.42  | TLDPER             | sp P01024 | 0.040345 | 15654.4 | 13425.1 | 16298.0 | 18811.6 | 15129.4 | 18655.2 | 21868.1 | 22794.1 | 22670.8 |
| 836  | 2 | 366.201 | 730.387  | 5.57  | AEDLVGK            | sp P01024 | 0.000682 | 12766.3 | 11463.5 | 12126.5 | 15612.3 | 14237.9 | 16208.0 | 11558.8 | 11969.2 | 12122.0 |
| 848  | 2 | 542.283 | 1082.552 | 7.63  | GYTQQLAFR          | sp P01024 | 0.000565 | 17613.8 | 15017.6 | 19077.5 | 25251.7 | 30643.6 | 25268.5 | 13969.7 | 15559.5 | 16281.3 |
| 948  | 3 | 463.905 | 1388.692 | 10.07 | KQELSEAEQATR       | sp P01024 | 0.002164 | 12972.1 | 12751.4 | 15406.8 | 19346.5 | 18257.5 | 17851.8 | 14555.0 | 14638.3 | 15696.0 |
| 971  | 2 | 340.703 | 679.391  | 3.36  | FLTTAK             | sp P01024 | 0.03696  | 8796.1  | 7236.8  | 9982.0  | 9937.8  | 10066.6 | 10766.0 | 10484.3 | 11049.8 | 9651.2  |
| 1001 | 2 | 417.249 | 832.483  | 3.89  | LPYSVVR            | sp P01024 | 6.42E-08 | 11399.1 | 13394.5 | 12038.1 | 16858.9 | 22493.6 | 16471.5 | 2565.4  | 2410.2  | 2661.6  |
| 1032 | 2 | 756.415 | 1510.816 | 17.06 | LVAYYTLIGASGQR     | sp P01024 | 0.000162 | 28636.6 | 26148.3 | 27458.9 | 39897.3 | 41101.1 | 37578.0 | 26737.6 | 24990.4 | 21174.6 |
| 1074 | 2 | 449.743 | 897.472  | 2.80  | AVLYNYR            | sp P01024 | 9.85E-07 | 10331.5 | 12332.2 | 10507.0 | 14845.0 | 20069.3 | 16034.1 | 3529.5  | 4139.7  | 4179.4  |
| 1096 | 2 | 555.818 | 1109.622 | 12.12 | VLLDGVQNPR         | sp P01024 | 0.003915 | 15122.1 | 12282.8 | 13494.4 | 18677.6 | 21854.9 | 18372.7 | 13456.9 | 13757.4 | 14505.9 |
| 1112 | 2 | 385.233 | 768.451  | 1.47  | VVPEGIR            | sp P01024 | 1.35E-05 | 11942.2 | 11905.8 | 12589.2 | 15637.4 | 16317.6 | 15788.6 | 17529.3 | 16584.6 | 16486.3 |
| 1120 | 2 | 596.297 | 1190.579 | 5.94  | SDDKVTLEER         | sp P01024 | 2.07E-06 | 16212.9 | 14550.8 | 14361.4 | 24811.4 | 25694.4 | 22608.3 | 13243.6 | 12534.2 | 14086.2 |
| 1143 | 2 | 444.233 | 886.452  | 1.43  | NEQVEIR            | sp P01024 | 1.51E-09 | 12165.9 | 11781.5 | 11964.0 | 18828.9 | 16201.2 | 16467.3 | 4172.2  | 4152.8  | 3957.4  |
| 1147 | 3 | 542.967 | 1625.878 | 14.46 | RIPIEDGSGEVLSR     | sp P01024 | 0.001912 | 16178.0 | 20467.2 | 17442.0 | 21941.2 | 21576.0 | 22485.9 | 27747.5 | 24128.5 | 28930.6 |
| 1153 | 3 | 320.855 | 959.542  | 2.00  | SVQLTEKR           | sp P01024 | 0.001223 | 3003.4  | 2318.7  | 2869.6  | 3339.8  | 3314.4  | 4106.9  | 6976.8  | 7315.7  | 5751.4  |
| 1154 | 3 | 413.579 | 1237.716 | 6.75  | KVLLDGVQNPR        | sp P01024 | 0.001479 | 11865.4 | 12983.1 | 12975.8 | 16463.2 | 15104.3 | 15853.5 | 14260.6 | 13975.6 | 16465.1 |
| 1166 | 3 | 552.937 | 1655.789 | 6.82  | LDKACEPGVDYVYK     | sp P01024 | 0.001814 | 16411.0 | 18472.3 | 15110.5 | 18675.3 | 20795.9 | 22190.2 | 20062.3 | 20318.0 | 21922.4 |
| 1180 | 3 | 722.673 | 2164.998 | 13.21 | AYYENSPQQVFSTEFVh  | sp P01024 | 1.20E-07 | 50657.7 | 43201.1 | 49015.6 | 65673.2 | 55587.6 | 63762.8 | 17084.7 | 14900.2 | 14782.6 |
| 1193 | 3 | 320.519 | 958.536  | 3.48  | EALKLEEK           | sp P01024 | 8.87E-05 | 5411.2  | 4946.3  | 4912.0  | 7211.8  | 6614.9  | 6687.4  | 7382.7  | 7006.7  | 6731.7  |
| 1208 | 3 | 815.442 | 2443.304 | 12.43 | EPGQDLVVLPLSITDFIP | sp P01024 | 2.09E-06 | 40971.0 | 37359.1 | 44938.3 | 75055.9 | 60645.5 | 68288.6 | 22491.6 | 20168.8 | 17781.0 |
| 1224 | 2 | 512.761 | 1023.508 | 9.44  | FISLGEACK          | sp P01024 | 0.006047 | 9753.7  | 9074.5  | 8915.4  | 12922.0 | 15253.0 | 11898.7 | 9906.6  | 12461.4 | 10244.3 |
| 1231 | 2 | 595.815 | 1189.616 | 7.29  | DFDFVPPVVR         | sp P01024 | 6.94E-08 | 18136.3 | 17027.8 | 17852.6 | 30476.1 | 19843.6 | 26861.7 | 3127.6  | 2905.7  | 3084.2  |
| 1232 | 3 | 614.669 | 1840.986 | 8.78  | VHQYFNVELIQPQAVK   | sp P01024 | 4.78E-07 | 24952.9 | 34149.4 | 27921.9 | 44607.6 | 49174.8 | 37614.7 | 5647.3  | 4474.4  | 4316.1  |
| 1262 | 3 | 619.291 | 1854.851 | 15.64 | SEETKENEGFTVTAEGK  | sp P01024 | 1.91E-05 | 33279.0 | 38409.0 | 35731.0 | 40857.6 | 31491.2 | 45961.1 | 13708.2 | 15454.2 | 15380.1 |

|      |   |         |          |       |                      |           |          |          |          |          |          |          |          |         |         |         |
|------|---|---------|----------|-------|----------------------|-----------|----------|----------|----------|----------|----------|----------|----------|---------|---------|---------|
| 1271 | 3 | 404.900 | 1211.678 | 11.11 | VTIKPAPETEK          | sp P01024 | 9.44E-09 | 12087.0  | 10770.2  | 12477.2  | 17200.2  | 15789.6  | 17107.0  | 3739.6  | 3183.5  | 3416.1  |
| 1278 | 3 | 540.285 | 1617.834 | 13.99 | TKKQELSEAEQATR       | sp P01024 | 4.27E-07 | 13374.4  | 13165.9  | 13344.9  | 16438.6  | 16003.2  | 14495.3  | 27726.1 | 27641.1 | 30735.7 |
| 1279 | 3 | 294.864 | 881.571  | 3.21  | LKGPLLNK             | sp P01024 | 0.00016  | 5401.4   | 6026.6   | 5529.6   | 7827.0   | 8130.7   | 6879.9   | 4677.7  | 4355.4  | 4902.6  |
| 1296 | 3 | 314.516 | 940.525  | 3.47  | EALKLEEK             | sp P01024 | 6.49E-05 | 4867.0   | 4474.7   | 4521.4   | 6055.4   | 5661.7   | 5924.0   | 6312.3  | 6159.3  | 6201.2  |
| 1354 | 2 | 314.179 | 626.344  | 1.33  | FLYGK                | sp P01024 | 7.76E-07 | 5258.7   | 6032.4   | 5470.1   | 7789.5   | 7362.1   | 7297.8   | 2632.1  | 2873.0  | 2820.0  |
| 1375 | 4 | 395.959 | 1579.806 | 6.13  | AKDQLTCNKFDLK        | sp P01024 | 1.02E-05 | 13050.5  | 12647.9  | 12423.8  | 16270.3  | 18270.3  | 16180.5  | 8503.2  | 8567.3  | 8271.5  |
| 1449 | 2 | 641.267 | 1280.519 | 10.69 | CAEENCFIQK           | sp P01024 | 0.000194 | 13398.9  | 13210.8  | 14623.7  | 16052.3  | 16363.9  | 18020.0  | 22932.7 | 25446.4 | 22306.1 |
| 1470 | 2 | 939.992 | 1877.970 | 16.90 | EYVLPSFEVIVEPTEK     | sp P01024 | 6.89E-08 | 48897.4  | 40680.1  | 46270.7  | 77838.8  | 64402.3  | 77013.2  | 8025.9  | 9418.0  | 6886.3  |
| 1514 | 5 | 321.768 | 1603.803 | 4.33  | FYHPEKEDGKLNK        | sp P01024 | 0.000179 | 8979.4   | 8146.0   | 9367.1   | 12777.0  | 10989.6  | 11113.3  | 7956.0  | 7517.4  | 7540.7  |
| 1533 | 4 | 368.692 | 1470.739 | 1.41  | AAVYHHFISDGVV        | sp P01024 | 0.000311 | 8811.9   | 11009.1  | 8697.8   | 12763.5  | 11580.4  | 12076.7  | 6934.9  | 7101.1  | 7686.0  |
| 1628 | 2 | 685.870 | 1369.726 | 15.06 | TIYTPGSTVLYR         | sp P01024 | 5.27E-06 | 20064.0  | 20219.4  | 20846.7  | 32091.8  | 23618.7  | 36984.8  | 4658.6  | 4455.7  | 6673.6  |
| 1636 | 4 | 405.466 | 1617.835 | 1.30  | TKKQELSEAEQATR       | sp P01024 | 1.87E-06 | 7374.4   | 6530.3   | 7575.2   | 8886.3   | 7739.4   | 8036.9   | 14077.3 | 14370.8 | 15192.1 |
| 1664 | 2 | 631.305 | 1260.596 | 18.06 | QELSEAEQATR          | sp P01024 | 1.84E-05 | 11523.3  | 11865.9  | 11428.0  | 14457.8  | 15139.4  | 14049.9  | 9795.2  | 8365.9  | 9045.6  |
| 1681 | 3 | 795.794 | 2384.360 | 11.97 | SSLSVPYVIVPLKTGLQEV  | sp P01024 | 3.50E-05 | 19021.1  | 15806.3  | 19166.7  | 17258.8  | 13212.7  | 16044.2  | 52148.0 | 65662.6 | 38325.6 |
| 1701 | 2 | 531.748 | 1061.482 | 15.11 | ADIGCTPGSGK          | sp P01024 | 1.02E-05 | 10986.5  | 9475.3   | 11881.0  | 15772.2  | 15514.8  | 16426.4  | 6358.8  | 6707.0  | 6389.8  |
| 1766 | 2 | 349.158 | 696.302  | 3.67  | FSCQR                | sp P01024 | 0.004564 | 13313.5  | 11869.2  | 12986.9  | 18895.0  | 14026.9  | 16767.8  | 19607.4 | 18155.3 | 19431.0 |
| 1805 | 3 | 665.350 | 1993.030 | 10.82 | KVEGTAFVIFIGIQDGEQR  | sp P01024 | 1.56E-08 | 32459.9  | 32404.3  | 30586.3  | 44484.5  | 48325.5  | 48562.7  | 16641.8 | 16227.5 | 15263.5 |
| 1807 | 3 | 600.983 | 1799.927 | 11.69 | VELLHNPAFCSLATTK     | sp P01024 | 6.80E-06 | 15837.1  | 20247.1  | 19295.3  | 22483.7  | 29108.4  | 24199.8  | 7898.1  | 8841.5  | 8469.4  |
| 1848 | 3 | 386.873 | 1157.599 | 3.24  | YISKYELDK            | sp P01024 | 6.42E-09 | 7402.8   | 6450.2   | 7756.8   | 11812.2  | 10909.2  | 10992.5  | 1574.9  | 1913.1  | 1728.7  |
| 1854 | 2 | 673.355 | 1344.695 | 16.06 | EVVADSVVVDVK         | sp P01024 | 1.69E-08 | 18757.1  | 20873.8  | 19139.2  | 28731.6  | 25978.9  | 26488.4  | 8055.4  | 7050.6  | 7243.1  |
| 1858 | 3 | 275.497 | 823.468  | 4.60  | ASHLGLAR             | sp P01024 | 0.009146 | 7210.6   | 5740.8   | 6855.9   | 9398.7   | 7325.9   | 8761.4   | 10655.7 | 10891.4 | 11280.7 |
| 1866 | 3 | 469.879 | 1406.616 | 9.51  | VSHSEDDCLAFK         | sp P01024 | 2.63E-08 | 8753.3   | 12387.3  | 9309.4   | 16971.3  | 15501.7  | 16491.5  | 406.3   | 602.0   | 660.5   |
| 1880 | 3 | 716.364 | 2146.070 | 12.69 | DAPDHQELNLDVSLQLPES  | sp P01024 | 1.15E-07 | 30567.9  | 26105.7  | 22369.8  | 39886.8  | 36278.6  | 37557.0  | 6348.4  | 7585.5  | 7098.2  |
| 1916 | 2 | 366.172 | 730.330  | 1.33  | WEDPGK               | sp P01024 | 4.82E-09 | 6090.3   | 5387.4   | 5793.7   | 8694.6   | 8372.4   | 8194.1   | 1670.3  | 1670.3  | 1462.2  |
| 1919 | 2 | 851.901 | 1701.787 | 14.11 | VFLDCCNYITELR        | sp P01024 | 0.004415 | 21260.5  | 19665.7  | 19098.6  | 30166.7  | 23413.5  | 21768.3  | 14830.1 | 16728.8 | 12186.3 |
| 1952 | 4 | 633.333 | 2529.302 | 8.08  | TMQALPYSTVGNSSNYLI   | sp P01024 | 0.001196 | 14584.8  | 18062.7  | 14476.0  | 20610.7  | 29866.6  | 17413.5  | 9682.6  | 9489.0  | 6992.8  |
| 1968 | 2 | 834.373 | 1666.732 | 15.06 | VYAYYNLEESCTR        | sp P01024 | 7.30E-05 | 39497.8  | 49869.6  | 37335.1  | 51226.6  | 54871.4  | 48608.8  | 19419.9 | 21590.0 | 25828.4 |
| 1987 | 3 | 719.701 | 2156.082 | 19.11 | ILLQGTPVAQMTEDAVDA   | sp P01024 | 0.00256  | 21048.8  | 13871.0  | 19797.7  | 34526.5  | 28168.2  | 32737.9  | 18489.3 | 17269.9 | 17495.2 |
| 1997 | 3 | 868.348 | 2602.023 | 19.90 | DTWVEHWPEEDECQDEI    | sp P01024 | 2.26E-06 | 28003.8  | 30802.3  | 31605.0  | 46076.9  | 51175.5  | 51169.1  | 12460.5 | 14597.8 | 10885.9 |
| 2027 | 3 | 717.741 | 2150.203 | 18.11 | QLYNVEATSYPALLALLQLI | sp P01024 | 1.86E-07 | 24963.1  | 16147.9  | 25474.5  | 41827.0  | 32682.3  | 40083.8  | 2606.0  | 2890.5  | 2318.0  |
| 2122 | 3 | 401.546 | 1201.615 | 3.68  | NTMILEICTR           | sp P01024 | 5.62E-05 | 5851.9   | 7375.7   | 6288.6   | 6843.5   | 8932.4   | 6993.3   | 2382.5  | 2488.7  | 3062.8  |
| 2148 | 3 | 943.184 | 2826.531 | 14.91 | QVREPGQDLVVLPLSITTI  | sp P01024 | 0.0025   | 27299.5  | 17624.0  | 18069.2  | 27301.4  | 20102.4  | 28976.5  | 44477.1 | 41923.6 | 37872.4 |
| 2202 | 4 | 733.618 | 2930.444 | 11.50 | SEFPESWLWNVEDLKEP    | sp P01024 | 0.000323 | 129455.7 | 106206.6 | 116928.6 | 160486.1 | 137314.8 | 160348.4 | 96505.4 | 99571.5 | 89771.3 |
| 2214 | 3 | 302.193 | 903.556  | 3.36  | GVFVLNKK             | sp P01024 | 0.000328 | 3074.5   | 2980.9   | 3073.0   | 4393.5   | 4543.0   | 4234.3   | 2532.8  | 2460.8  | 2415.2  |



|      |   |          |          |       |                      |           |          |         |         |         |         |         |         |         |         |         |
|------|---|----------|----------|-------|----------------------|-----------|----------|---------|---------|---------|---------|---------|---------|---------|---------|---------|
| 2216 | 3 | 286.833  | 857.478  | 1.34  | IFTVNHK              | sp P01024 | 2.06E-06 | 3695.5  | 3477.3  | 4442.9  | 5626.4  | 4859.8  | 5290.3  | 1560.5  | 1817.2  | 1842.6  |
| 2300 | 4 | 432.776  | 1727.075 | 7.30  | VVLVAVDKGVFVLNKK     | sp P01024 | 0.00201  | 4120.1  | 6701.0  | 3801.1  | 4137.2  | 6210.2  | 5266.1  | 10552.9 | 10387.3 | 12566.6 |
| 2303 | 2 | 480.275  | 958.535  | 1.42  | EALKLEEK             | sp P01024 | 0.001367 | 4828.9  | 4850.1  | 4223.8  | 5989.1  | 6652.9  | 5766.2  | 6586.3  | 6102.9  | 6129.8  |
| 2360 | 4 | 485.248  | 1936.962 | 8.57  | SGQSEDRQPVPQGQMTI    | sp P01024 | 0.00381  | 9491.3  | 8416.0  | 9582.3  | 12213.1 | 9995.4  | 10584.5 | 9450.6  | 10257.4 | 9992.4  |
| 2403 | 3 | 753.042  | 2256.103 | 12.78 | VQLSNDFDEYIMAIEQTIK  | sp P01024 | 0.000761 | 11369.1 | 9266.2  | 10784.2 | 25786.9 | 18137.2 | 20499.1 | 13291.4 | 12216.8 | 10924.0 |
| 2413 | 5 | 676.537  | 3377.650 | 12.00 | LESEETMVAEHDAQGD     | sp P01024 | 0.000751 | 18862.2 | 20089.4 | 17543.3 | 29088.7 | 27449.6 | 26385.8 | 25979.7 | 24420.6 | 22467.4 |
| 2559 | 3 | 662.663  | 1984.966 | 12.75 | SGQSEDRQPVPQGQMTI    | sp P01024 | 0.000602 | 10583.2 | 13472.8 | 11131.6 | 18194.4 | 21623.8 | 19070.8 | 15974.1 | 15190.2 | 16282.5 |
| 2605 | 3 | 832.055  | 2493.144 | 22.38 | DYAGVFS DAGLFTTSSSC  | sp P01024 | 1.73E-05 | 26416.4 | 20859.4 | 22665.8 | 35973.0 | 26741.4 | 33844.0 | 12227.8 | 12170.6 | 11944.5 |
| 2655 | 4 | 401.957  | 1603.801 | 3.86  | FYHPEKEDGKLNK        | sp P01024 | 3.74E-06 | 7096.0  | 6371.0  | 7406.9  | 9384.9  | 9744.2  | 9263.1  | 5255.8  | 5598.4  | 5273.7  |
| 2698 | 3 | 860.109  | 2577.305 | 15.17 | TMQALPYSTVGNSSNYLI   | sp P01024 | 0.004173 | 11800.8 | 8036.3  | 7646.3  | 19165.6 | 15681.0 | 22777.2 | 8698.3  | 11358.5 | 7979.2  |
| 2872 | 4 | 497.504  | 1985.986 | 6.88  | KVFLDCCNYITELRR      | sp P01024 | 0.0006   | 5599.4  | 6847.1  | 6169.0  | 6644.0  | 8027.3  | 6673.8  | 11730.6 | 9418.1  | 11538.9 |
| 2911 | 3 | 797.415  | 2389.223 | 18.91 | EVVADSVWVDVKDSCVG    | sp P01024 | 0.001446 | 13869.3 | 11652.3 | 15399.9 | 18410.5 | 14344.3 | 16186.1 | 23596.6 | 26542.5 | 20500.9 |
| 2926 | 3 | 556.585  | 1666.733 | 9.58  | VYAYYNLEESCTR        | sp P01024 | 6.28E-07 | 12680.1 | 13653.6 | 11833.5 | 17137.5 | 16669.7 | 15050.6 | 6974.7  | 6171.5  | 6310.6  |
| 3040 | 2 | 601.814  | 1201.614 | 6.24  | NTMILEICTR           | sp P01024 | 0.000271 | 6749.0  | 8885.9  | 7283.0  | 8102.4  | 11351.1 | 8685.4  | 3373.8  | 3176.0  | 4019.5  |
| 3072 | 3 | 626.997  | 1877.970 | 11.73 | EYVLPSEFIVIEPTEK     | sp P01024 | 3.29E-07 | 11717.8 | 9986.9  | 11222.6 | 16911.1 | 15144.5 | 17045.4 | 1955.1  | 1500.0  | 1201.1  |
| 3105 | 4 | 641.830  | 2563.290 | 11.96 | QKPDGVFQEDAPVIHQEI   | sp P01024 | 5.79E-05 | 8180.5  | 11045.7 | 8242.4  | 15077.3 | 16498.7 | 13834.0 | 5658.2  | 5005.5  | 3884.7  |
| 3109 | 2 | 439.763  | 877.511  | 2.25  | LMNIFLK              | sp P01024 | 3.74E-06 | 2109.3  | 2166.1  | 2147.2  | 4169.5  | 5477.4  | 4409.8  | 1222.2  | 1168.8  | 900.8   |
| 3252 | 2 | 668.370  | 1334.726 | 16.06 | APSTWLTAYVVK         | sp P01024 | 8.82E-08 | 8282.0  | 6214.9  | 6469.9  | 12965.7 | 9552.8  | 11503.5 | 1235.3  | 1057.9  | 959.4   |
| 3382 | 3 | 568.270  | 1701.788 | 5.41  | VFLDCCNYITELR        | sp P01024 | 0.001679 | 6287.9  | 5711.9  | 5857.8  | 8406.1  | 6784.0  | 6646.4  | 4504.1  | 4683.3  | 3788.8  |
| 3403 | 2 | 568.294  | 1134.574 | 14.06 | QPSSAFAAFVK          | sp P01024 | 0.02777  | 4650.9  | 3366.3  | 4256.0  | 6209.5  | 4757.8  | 7050.4  | 3332.6  | 4235.4  | 3889.5  |
| 3530 | 4 | 1030.771 | 4119.053 | 14.43 | NNNEKDMALTAFLVLSLQI  | sp P01024 | 0.000318 | 23824.9 | 17512.6 | 23104.3 | 24751.1 | 28167.4 | 23676.4 | 35673.9 | 32972.4 | 33191.7 |
| 3556 | 4 | 387.704  | 1546.785 | 5.74  | SDDKVTLEERLDK        | sp P01024 | 2.09E-08 | 2196.1  | 2035.2  | 1975.7  | 1764.1  | 2006.4  | 1657.9  | 6764.1  | 6586.2  | 6559.1  |
| 3702 | 2 | 437.225  | 872.436  | 4.64  | QLANGVDR             | sp P01024 | 1.01E-07 | 3018.1  | 3015.0  | 3227.5  | 5064.0  | 4360.0  | 5196.1  | 593.9   | 656.5   | 451.9   |
| 3711 | 3 | 497.927  | 1490.758 | 8.39  | GQGTLSSVVTMYHAK      | sp P01024 | 1.04E-06 | 3375.4  | 4165.1  | 3367.9  | 5375.6  | 5978.2  | 5980.9  | 2000.8  | 1986.6  | 2027.1  |
| 3845 | 2 | 436.734  | 871.453  | 4.41  | QLANGVDR             | sp P01024 | 2.97E-07 | 3308.2  | 3111.2  | 3470.3  | 4542.4  | 4482.7  | 4168.2  | 1606.2  | 1592.4  | 1458.8  |
| 4097 | 3 | 893.758  | 2678.251 | 11.33 | YGGGGYGSTQATFMVFC    | sp P01024 | 5.99E-07 | 10283.6 | 11056.2 | 11447.1 | 24392.0 | 18269.1 | 22666.9 | 5313.2  | 4308.0  | 4402.8  |
| 4468 | 2 | 695.353  | 1388.691 | 13.12 | KQELSEAEQATR         | sp P01024 | 9.16E-05 | 3619.8  | 4011.1  | 3934.5  | 6059.0  | 7185.2  | 5891.8  | 3786.3  | 3472.1  | 3703.4  |
| 4992 | 4 | 831.459  | 3321.807 | 12.64 | QLYNVEATSYALLALLQLI  | sp P01024 | 0.001919 | 7193.0  | 7424.7  | 7539.2  | 7928.7  | 8586.7  | 10056.7 | 6761.4  | 5457.0  | 5516.8  |
| 5064 | 3 | 1108.275 | 3321.805 | 24.44 | QLYNVEATSYALLALLQLI  | sp P01024 | 0.002818 | 11484.5 | 10584.5 | 11812.5 | 12380.3 | 12211.0 | 15326.1 | 10197.7 | 8463.8  | 8257.1  |
| 5468 | 4 | 744.636  | 2974.513 | 15.52 | AEDLVGKSLYVSATVILHf  | sp P01024 | 2.03E-06 | 5034.5  | 4003.2  | 5062.1  | 5066.5  | 4193.0  | 5357.3  | 14077.3 | 14062.0 | 12521.9 |
| 5475 | 4 | 1009.538 | 4034.124 | 14.96 | WEDPGKQLYNVEATSYA    | sp P01024 | 1.35E-06 | 10654.9 | 8726.6  | 10297.6 | 7486.4  | 7047.9  | 7466.3  | 16126.8 | 16312.7 | 15035.1 |
| 5784 | 4 | 707.641  | 2826.533 | 12.18 | QVREPGQDLVVLPLSITTI  | sp P01024 | 0.001032 | 4619.8  | 3161.7  | 3344.1  | 5311.8  | 3821.0  | 5063.9  | 7438.3  | 7656.5  | 6883.3  |
| 5969 | 3 | 334.499  | 1000.475 | 3.34  | NRWEDPGK             | sp P01024 | 1.16E-07 | 1308.7  | 1238.0  | 1439.4  | 1727.4  | 1596.6  | 1727.5  | 644.8   | 611.0   | 636.7   |
| 6115 | 2 | 1222.658 | 2443.302 | 16.17 | EPGQDLVVLPLSITTFDFIP | sp P01024 | 7.13E-06 | 9338.8  | 8663.9  | 10574.5 | 19856.3 | 15181.2 | 17939.1 | 4733.6  | 4634.4  | 3384.3  |

|       |   |          |          |       |                      |           |          |         |          |         |          |          |          |          |          |          |
|-------|---|----------|----------|-------|----------------------|-----------|----------|---------|----------|---------|----------|----------|----------|----------|----------|----------|
| 6307  | 3 | 641.997  | 1922.970 | 10.50 | DSITTWEILAVSMSDKK    | sp P01024 | 1.78E-06 | 4881.6  | 3586.4   | 4258.4  | 9265.9   | 8256.9   | 8472.5   | 1771.6   | 1156.0   | 1384.8   |
| 6910  | 3 | 783.744  | 2348.209 | 8.40  | NNNEKDMALTAFLVLSLQI  | sp P01024 | 1.66E-08 | 5554.2  | 4610.6   | 5125.8  | 11431.2  | 10987.2  | 12167.1  | 907.7    | 1255.1   | 1044.9   |
| 7620  | 2 | 1129.057 | 2256.100 | 16.95 | VQLSNDFDEYIMAIEQTIK  | sp P01024 | 0.001364 | 4600.5  | 3443.8   | 4430.6  | 11172.3  | 7809.8   | 8750.2   | 4719.7   | 4505.4   | 3846.3   |
| 7700  | 4 | 313.152  | 1248.580 | 3.41  | FYHPEKEDGK           | sp P01024 | 3.07E-05 | 2568.6  | 2203.1   | 2486.2  | 3834.9   | 2880.6   | 3931.5   | 839.3    | 815.8    | 886.7    |
| 8820  | 2 | 1076.108 | 2150.201 | 21.90 | QLYNVEATSYALLALLQLI  | sp P01024 | 1.93E-06 | 6861.1  | 4205.7   | 7747.8  | 12800.7  | 8789.1   | 12180.9  | 896.5    | 923.9    | 725.6    |
| 9215  | 4 | 1007.246 | 4024.954 | 8.73  | AYYENSPQQVFSTEFEVt   | sp P01024 | 0.000932 | 6406.0  | 6562.3   | 8269.5  | 6977.7   | 6617.0   | 7793.9   | 7504.8   | 7831.1   | 8745.9   |
| 9342  | 3 | 739.750  | 2216.227 | 21.11 | VFSLAVNLIADSQVLCGA   | sp P01024 | 3.30E-07 | 5418.8  | 4840.8   | 5676.0  | 12230.7  | 10865.0  | 10944.0  | 1151.9   | 896.4    | 633.7    |
| 9909  | 3 | 917.112  | 2748.313 | 15.17 | YFKPGMPFDLMVFTNPI    | sp P01024 | 3.32E-06 | 5529.4  | 4364.1   | 4454.5  | 11678.1  | 14188.2  | 12400.7  | 5169.6   | 4544.8   | 4412.7   |
| 11070 | 5 | 824.818  | 4119.055 | 6.51  | NNNEKDMALTAFLVLSLQI  | sp P01024 | 9.67E-07 | 2024.6  | 1731.6   | 1951.1  | 2581.1   | 2366.9   | 2425.2   | 4001.8   | 3598.8   | 3430.9   |
| 11484 | 3 | 955.181  | 2862.522 | 11.59 | WEDPGKQLYNVEATSYA    | sp P01024 | 1.14E-09 | 3738.3  | 3684.7   | 3747.4  | 6022.6   | 6563.8   | 6039.6   | 1082.8   | 1238.0   | 1197.2   |
| 12272 | 3 | 824.738  | 2471.191 | 20.11 | GICVADPFVETVMQDFFI   | sp P01024 | 7.38E-08 | 2030.9  | 1928.7   | 2501.9  | 5099.5   | 4796.0   | 5906.3   | 551.8    | 469.0    | 425.7    |
| 13552 | 3 | 1000.505 | 2998.492 | 11.59 | EYVLPSEVIVEPTEKIFY   | sp P01024 | 1.29E-05 | 2631.2  | 1645.3   | 2596.2  | 1916.4   | 1560.8   | 1906.5   | 5236.5   | 5299.0   | 5021.0   |
| 14888 | 3 | 1094.887 | 3281.638 | 22.96 | QDSLSSQNQLGVLPLSW    | sp P01024 | 0.000106 | 3149.5  | 2950.7   | 3012.8  | 8674.4   | 7489.8   | 6887.7   | 1106.0   | 2281.2   | 1683.3   |
| 16170 | 3 | 937.509  | 2809.505 | 15.91 | QVREPGQDLVVLPLSITTI  | sp P01024 | 4.63E-07 | 1108.8  | 1106.2   | 1142.3  | 1890.3   | 1832.1   | 1685.0   | 4218.4   | 3557.7   | 4012.8   |
| 16370 | 4 | 716.638  | 2862.522 | 7.79  | WEDPGKQLYNVEATSYA    | sp P01024 | 8.80E-10 | 1392.5  | 1401.6   | 1367.3  | 2321.1   | 2342.5   | 2257.7   | 312.5    | 345.8    | 361.7    |
| 16781 | 3 | 720.646  | 2158.916 | 10.94 | QCQDLGAFTESMVFVFC    | sp P01024 | 0.002006 | 1100.3  | 757.8    | 1361.5  | 1990.2   | 1722.1   | 1980.0   | 774.5    | 846.6    | 733.3    |
| 17486 | 5 | 807.832  | 4034.126 | 6.78  | WEDPGKQLYNVEATSYA    | sp P01024 | 6.67E-06 | 1493.8  | 1210.0   | 1405.3  | 1058.4   | 946.2    | 1024.2   | 2224.1   | 2197.4   | 2006.5   |
| 24450 | 4 | 985.034  | 3936.108 | 16.05 | EPGQDLVVLPLSITDFIP   | sp P01024 | 0.01031  | 1550.4  | 1603.7   | 1660.3  | 1643.1   | 1342.1   | 1537.9   | 1448.6   | 1347.2   | 1135.5   |
| 25219 | 3 | 753.369  | 2257.086 | 12.78 | VQLSNDFDEYIMAIEQTIK  | sp P01024 | 0.008401 | 348.6   | 287.0    | 334.2   | 721.6    | 662.4    | 630.1    | 498.5    | 396.1    | 277.7    |
| 29328 | 4 | 880.954  | 3519.789 | 15.65 | DMALTAFLVLSLQEAKDIC  | sp P01024 | 0.007729 | 450.2   | 531.0    | 709.4   | 1245.3   | 863.5    | 1015.1   | 349.4    | 581.3    | 275.0    |
| 10288 | 3 | 682.349  | 2044.025 | 10.75 | SYFPESWLWEVHLVPR     | sp P01031 | 0.025497 | 4637.2  | 3672.1   | 4919.2  | 5847.0   | 4718.1   | 6041.2   | 5873.1   | 6091.5   | 6083.9   |
| 15331 | 3 | 947.141  | 2838.400 | 13.04 | YGGGFYSTQDTINAIEGL   | sp P01031 | 7.28E-05 | 1919.0  | 1362.8   | 1581.6  | 2968.0   | 2779.6   | 3324.7   | 1264.1   | 981.0    | 1128.2   |
| 20678 | 3 | 705.692  | 2114.055 | 12.16 | YIYPLDSLWIEYWPR      | sp P01031 | 9.96E-05 | 665.4   | 621.7    | 780.9   | 1188.7   | 1185.0   | 1255.4   | 407.4    | 534.5    | 329.4    |
| 22106 | 3 | 872.179  | 2613.514 | 16.17 | GLLVGEILSAVLSQEGINII | sp P01031 | 0.009449 | 799.0   | 777.2    | 1085.3  | 1372.6   | 1375.7   | 1447.9   | 828.6    | 1021.0   | 919.3    |
| 24458 | 5 | 856.024  | 4275.083 | 1.99  | GSAEAEIAMSVPVYFVt    | sp P01031 | 0.000559 | 933.7   | 879.2    | 809.3   | 1179.1   | 1274.6   | 1270.4   | 1739.0   | 1468.3   | 1225.1   |
| 29129 | 3 | 840.453  | 2518.336 | 15.38 | VDDGVASFVNLNPSGVT    | sp P01031 | 2.61E-07 | 695.3   | 714.7    | 609.5   | 1405.6   | 1362.3   | 1438.2   | 338.7    | 349.2    | 266.2    |
| 489   | 2 | 626.299  | 1250.584 | 15.06 | TVGSDTFYSFK          | sp P01042 | 0.007536 | 40396.9 | 48634.0  | 41782.4 | 47470.1  | 48703.2  | 45517.8  | 55694.4  | 57502.7  | 72902.8  |
| 623   | 3 | 838.078  | 2511.213 | 19.91 | IASFSQNCDIYPGKDFVQI  | sp P01042 | 0.002753 | 92777.8 | 117151.1 | 85909.1 | 107999.2 | 103375.7 | 100865.7 | 157298.7 | 163969.3 | 131009.0 |
| 668   | 3 | 505.558  | 1513.653 | 9.40  | TWQDCEYKDAAK         | sp P01042 | 0.017559 | 20036.6 | 29697.6  | 27950.2 | 24576.7  | 23230.6  | 25574.8  | 33971.9  | 39140.3  | 34705.0  |
| 713   | 2 | 538.739  | 1075.462 | 14.02 | EGDCPVQSGK           | sp P01042 | 0.016331 | 25551.5 | 21018.0  | 24890.5 | 26851.8  | 23569.1  | 29941.8  | 36991.3  | 40467.9  | 35348.0  |
| 741   | 2 | 515.773  | 1029.531 | 6.94  | YFIDFVAR             | sp P01042 | 4.01E-05 | 15617.5 | 15832.6  | 18580.4 | 18847.5  | 17326.0  | 19386.8  | 26998.4  | 27160.4  | 25823.0  |
| 761   | 2 | 502.289  | 1002.563 | 8.49  | QVVAGLNFR            | sp P01042 | 0.034526 | 15426.2 | 17744.7  | 15279.7 | 12803.0  | 19505.9  | 14623.6  | 19705.6  | 22700.0  | 25809.4  |
| 1485  | 2 | 583.280  | 1164.546 | 16.06 | AATGECTATVGK         | sp P01042 | 0.003873 | 13251.3 | 11546.1  | 14150.3 | 16659.0  | 13588.7  | 17074.0  | 10492.1  | 10526.0  | 11498.9  |
| 1749  | 2 | 692.336  | 1382.657 | 16.06 | ENFLFLTPDCK          | sp P01042 | 1.46E-05 | 16114.8 | 10907.9  | 14553.6 | 23665.5  | 23366.3  | 22751.3  | 8203.5   | 8516.5   | 7678.9   |

|       |   |          |          |       |                     |           |          |          |          |          |          |          |          |          |          |          |
|-------|---|----------|----------|-------|---------------------|-----------|----------|----------|----------|----------|----------|----------|----------|----------|----------|----------|
| 2226  | 3 | 537.256  | 1608.747 | 8.73  | YEIKEGDCPVQSGK      | sp P01042 | 3.09E-05 | 8383.0   | 9040.8   | 7451.3   | 8409.5   | 8515.4   | 6917.9   | 15852.2  | 16257.9  | 15874.2  |
| 2823  | 2 | 350.722  | 699.429  | 1.46  | VQVVAGK             | sp P01042 | 0.02762  | 6455.8   | 5606.2   | 7425.3   | 6891.0   | 5740.1   | 7155.5   | 10432.4  | 9778.1   | 10508.6  |
| 2874  | 3 | 386.882  | 1157.625 | 2.10  | KYFIDFVAR           | sp P01042 | 0.014978 | 2317.6   | 2777.0   | 2557.7   | 2603.8   | 3483.2   | 2489.2   | 3558.9   | 3833.3   | 5174.7   |
| 2989  | 3 | 814.374  | 2440.100 | 16.11 | SLWNGDTGECTDNAYIDI  | sp P01042 | 0.001263 | 18694.5  | 14597.1  | 16241.2  | 20463.2  | 17061.0  | 17389.1  | 22491.6  | 19576.0  | 23246.9  |
| 3386  | 4 | 628.811  | 2511.215 | 11.90 | IASFSQNCDIYPGKDFVQI | sp P01042 | 0.007532 | 8594.9   | 11163.4  | 8133.3   | 10702.0  | 9766.1   | 9725.3   | 14971.8  | 15651.0  | 11697.7  |
| 3738  | 3 | 272.505  | 814.492  | 4.15  | AVDAALKK            | sp P01042 | 0.029063 | 2962.6   | 2401.2   | 3081.4   | 3659.5   | 2738.5   | 3158.6   | 4419.1   | 4231.2   | 5235.0   |
| 4748  | 4 | 591.558  | 2362.203 | 12.54 | KLQSLDCNAEVVVPW     | sp P01042 | 0.000112 | 2179.0   | 3144.3   | 2902.8   | 2736.8   | 2873.5   | 2209.0   | 7048.0   | 6639.5   | 9641.0   |
| 7402  | 3 | 300.822  | 899.445  | 1.30  | CPGRPWK             | sp P01042 | 0.005902 | 1535.0   | 1251.7   | 1505.6   | 1414.0   | 1093.1   | 1383.8   | 2442.4   | 2595.5   | 2540.9   |
| 266   | 2 | 695.311  | 1388.607 | 14.11 | SSEDPNEDIVER        | sp P01591 | 0.016262 | 101308.2 | 140875.8 | 99598.9  | 95682.3  | 96601.1  | 94321.1  | 135552.3 | 125785.0 | 148637.8 |
| 467   | 3 | 427.882  | 1280.624 | 7.79  | FVYHLSDLCK          | sp P01591 | 0.014793 | 30259.8  | 33132.6  | 27385.3  | 26731.5  | 30634.0  | 24045.1  | 34019.0  | 30321.7  | 34455.4  |
| 746   | 2 | 828.920  | 1655.825 | 16.90 | CYTAVVPLVYGGETK     | sp P01591 | 0.009354 | 59050.2  | 55281.7  | 68731.3  | 49252.0  | 62271.3  | 52740.8  | 71622.6  | 73884.5  | 68033.2  |
| 946   | 2 | 400.748  | 799.482  | 1.45  | IVLVDNK             | sp P01591 | 0.005765 | 11232.6  | 17155.3  | 11525.9  | 11584.8  | 11704.6  | 10736.7  | 7313.7   | 7610.8   | 9475.7   |
| 1549  | 4 | 353.187  | 1408.719 | 6.06  | FVYHLSDLCKK         | sp P01591 | 0.001274 | 6878.8   | 8605.7   | 7200.0   | 5481.1   | 7118.1   | 6419.2   | 9358.6   | 10641.3  | 11274.6  |
| 2066  | 2 | 791.843  | 1581.672 | 11.32 | MVETALTPDACYPD      | sp P01591 | 0.017912 | 17771.1  | 21897.6  | 21351.6  | 20759.0  | 18370.9  | 20856.4  | 26409.8  | 32133.4  | 26331.6  |
| 2336  | 2 | 820.407  | 1638.799 | 14.90 | CYTAVVPLVYGGETK     | sp P01591 | 0.002061 | 18475.0  | 16508.4  | 19277.1  | 19033.3  | 15929.3  | 16450.1  | 21967.6  | 24379.0  | 22737.3  |
| 2186  | 2 | 525.257  | 1048.499 | 4.06  | ITCQGDSLR           | sp P01714 | 0.00396  | 6792.2   | 6909.6   | 6474.9   | 6672.1   | 4817.5   | 5637.0   | 6977.8   | 6211.2   | 6731.2   |
| 9005  | 3 | 636.329  | 1905.966 | 11.54 | ALEWLALIYWDDDKR     | sp P01817 | 0.000211 | 4251.2   | 2995.8   | 3437.8   | 3319.9   | 2603.3   | 3057.5   | 1575.7   | 1568.5   | 1322.9   |
| 30432 | 3 | 705.405  | 2113.194 | 11.14 | LDIQGTGQLLFSVVINQLF | sp P01833 | 3.03E-05 | 56.7     | 23.3     | 97.5     | 122.4    | 110.6    | 87.3     | 1233.7   | 1100.2   | 1430.4   |
| 54    | 2 | 435.183  | 868.351  | 5.54  | SFNRGEC             | sp P01834 | 0.006454 | 114163.8 | 104808.3 | 129491.5 | 102796.9 | 84974.0  | 112780.9 | 159031.3 | 163395.2 | 150243.1 |
| 233   | 3 | 712.662  | 2134.965 | 20.11 | VDNALQSGNSQESVTEQ   | sp P01834 | 4.76E-05 | 193575.1 | 226953.9 | 180758.6 | 196682.6 | 221982.0 | 190365.6 | 82596.2  | 96570.5  | 74943.2  |
| 234   | 4 | 536.026  | 2140.077 | 14.70 | HKVYACEVTHQGLSSPV   | sp P01834 | 3.62E-06 | 120022.2 | 118367.0 | 108194.4 | 110524.6 | 115131.3 | 104817.0 | 175303.2 | 172711.1 | 167425.6 |
| 608   | 2 | 751.884  | 1501.753 | 16.06 | DSTYLSSTLTLSK       | sp P01834 | 5.76E-08 | 119728.5 | 112637.4 | 121686.4 | 137241.9 | 145661.0 | 138270.2 | 54702.3  | 47400.6  | 44840.8  |
| 1055  | 2 | 1068.489 | 2134.964 | 19.90 | VDNALQSGNSQESVTEQ   | sp P01834 | 0.000393 | 78444.8  | 101876.0 | 62205.5  | 77857.2  | 110025.4 | 74778.2  | 28774.5  | 34881.3  | 28976.8  |
| 2569  | 2 | 435.675  | 869.335  | 1.46  | SFNRGEC             | sp P01834 | 0.001035 | 4528.3   | 4163.0   | 4893.6   | 4681.2   | 3745.4   | 4171.8   | 5497.5   | 5666.6   | 5700.6   |
| 6497  | 4 | 1041.009 | 4160.007 | 14.38 | VQWKVDNALQSGNSQE    | sp P01834 | 8.35E-10 | 1981.3   | 2157.9   | 2104.9   | 1050.0   | 1303.2   | 1644.7   | 102982.0 | 98524.5  | 78862.4  |
| 8308  | 2 | 435.675  | 869.335  | 1.46  | SFNRGEC             | sp P01834 | 0.001588 | 952.1    | 904.0    | 1045.7   | 809.6    | 767.1    | 883.5    | 1065.4   | 1309.4   | 1277.1   |
| 13199 | 4 | 931.983  | 3723.901 | 11.82 | TVAAPSVFIFPPSDEQLK  | sp P01834 | 5.54E-08 | 8725.8   | 6942.1   | 8196.2   | 7355.7   | 4924.0   | 6346.5   | 61155.4  | 58626.9  | 56887.2  |
| 326   | 3 | 559.940  | 1676.798 | 14.06 | FNWYVDGVEVHNAK      | sp P01857 | 0.002222 | 86955.8  | 89440.0  | 83022.7  | 60851.7  | 78089.5  | 62669.6  | 44020.5  | 44527.0  | 60304.7  |
| 428   | 3 | 713.682  | 2138.024 | 20.90 | TPEVTCVVVDVSHEDPE   | sp P01857 | 1.34E-05 | 159247.4 | 155321.7 | 177716.1 | 113453.6 | 123262.7 | 114166.3 | 66886.9  | 72416.3  | 81203.1  |
| 513   | 2 | 593.828  | 1185.641 | 16.06 | GPSVFPLAPSSK        | sp P01857 | 0.023927 | 59646.6  | 64488.2  | 62000.6  | 42925.5  | 33942.6  | 53282.1  | 46536.6  | 44954.9  | 54554.9  |
| 935   | 2 | 937.466  | 1872.917 | 14.90 | TTPPVLDSDGSFFLYSK   | sp P01857 | 0.008322 | 130907.6 | 84358.1  | 111195.8 | 86147.8  | 69914.0  | 91341.6  | 64507.4  | 59930.6  | 57398.6  |
| 1063  | 4 | 711.871  | 2843.455 | 14.78 | THTCPPCPAPELLGGPS   | sp P01857 | 7.26E-05 | 156076.7 | 132716.8 | 151937.2 | 99348.4  | 87822.1  | 100913.9 | 83221.5  | 84529.0  | 78336.6  |
| 1339  | 5 | 1343.470 | 6712.315 | 14.08 | DYFPEPVTVSWNSGALT   | sp P01857 | 0.002428 | 223058.4 | 169016.8 | 209021.9 | 211277.5 | 236451.2 | 214047.7 | 127876.8 | 162331.7 | 126009.8 |
| 1914  | 5 | 667.735  | 3333.641 | 7.35  | SCDKTHTCPPCPAPELLC  | sp P01857 | 0.002161 | 66570.3  | 68835.1  | 68952.5  | 52416.3  | 66578.4  | 50045.1  | 86096.1  | 77705.6  | 78567.1  |

|       |   |          |          |       |                               |          |          |          |          |          |          |          |          |          |          |
|-------|---|----------|----------|-------|-------------------------------|----------|----------|----------|----------|----------|----------|----------|----------|----------|----------|
| 4022  | 6 | 1119.727 | 6712.315 | 9.84  | DYFPEPVTVSWNSGALT:sp P01857   | 0.001655 | 42589.3  | 33126.1  | 41122.4  | 38062.1  | 46843.7  | 41074.3  | 25419.3  | 28443.9  | 25272.9  |
| 8191  | 6 | 1336.836 | 8014.972 | 10.63 | STSGGTAALGCLVKDYFF sp P01857  | 3.97E-08 | 5364.8   | 4729.6   | 7006.6   | 3447.2   | 3243.4   | 4392.2   | 60417.9  | 55862.8  | 56459.0  |
| 1190  | 4 | 554.551  | 2214.174 | 12.54 | VVSVLTVVHQDWLNGKE sp P01859   | 0.017326 | 24507.0  | 25013.9  | 26424.2  | 18620.7  | 27527.9  | 17882.5  | 25644.8  | 26986.2  | 26014.0  |
| 1309  | 2 | 412.748  | 823.482  | 5.52  | GLPAPIEK sp P01859            | 0.047624 | 10300.8  | 11222.0  | 11026.1  | 8840.1   | 11150.1  | 8426.9   | 9828.6   | 8842.2   | 10132.8  |
| 1314  | 3 | 598.669  | 1792.986 | 11.89 | VVSVLTVVHQDWLNGK sp P01859    | 0.000203 | 29268.3  | 33799.8  | 24253.7  | 19344.7  | 16792.7  | 18698.9  | 13706.5  | 15864.6  | 13783.6  |
| 2409  | 3 | 598.997  | 1793.970 | 11.85 | VVSVLTVVHQDWLNGK sp P01859    | 0.000193 | 25118.2  | 18367.0  | 23610.5  | 21297.2  | 17753.0  | 21526.4  | 9406.4   | 10065.2  | 7197.9   |
| 3819  | 3 | 970.140  | 2907.398 | 20.78 | CCVECPCPAPPVAGPS' sp P01859   | 0.017773 | 48575.9  | 42757.1  | 40224.6  | 38720.8  | 31852.5  | 39775.1  | 38478.2  | 40644.5  | 31946.9  |
| 4219  | 4 | 554.304  | 2213.187 | 4.12  | VVSVLTVVHQDWLNGKE sp P01859   | 2.43E-07 | 3661.4   | 3168.2   | 3925.2   | 2062.6   | 1803.2   | 1526.1   | 7378.7   | 7350.6   | 7067.0   |
| 3076  | 3 | 452.551  | 1354.632 | 10.85 | TPLGDTTHTCPR sp P01860        | 1.58E-05 | 5040.0   | 4891.2   | 4673.8   | 2909.9   | 2421.5   | 3067.9   | 4621.1   | 4650.8   | 4106.6   |
| 3273  | 2 | 593.753  | 1185.492 | 13.02 | SCDTPPPCPR sp P01860          | 6.75E-07 | 15565.2  | 14435.6  | 13980.9  | 9311.4   | 9213.0   | 9074.3   | 16370.6  | 15499.6  | 14054.5  |
| 11230 | 5 | 1341.064 | 6700.284 | 7.14  | DYFPEPVTVSWNSGALT:sp P01860   | 0.000814 | 16235.9  | 10765.8  | 14327.3  | 9392.2   | 8382.1   | 8434.8   | 8019.2   | 8187.5   | 7149.6   |
| 1453  | 3 | 981.825  | 2942.453 | 20.78 | YGPPCPCPAPEFLGGP:sp P01861    | 0.00028  | 149968.8 | 124585.6 | 135172.9 | 89079.1  | 68258.6  | 85954.2  | 142236.7 | 142224.4 | 124135.9 |
| 2287  | 2 | 951.469  | 1900.923 | 14.90 | TTPVLDSGDSFFLYSR sp P01861    | 0.001344 | 45676.1  | 33100.4  | 41127.5  | 27694.6  | 24367.6  | 25684.6  | 29196.5  | 26240.7  | 24984.9  |
| 2356  | 2 | 415.735  | 829.456  | 2.24  | GLPSSIEK sp P01861            | 4.82E-05 | 7658.4   | 9566.9   | 7501.9   | 4321.9   | 5290.3   | 4610.6   | 8051.5   | 7778.4   | 7895.2   |
| 3135  | 4 | 1264.894 | 5055.545 | 14.51 | DYFPEPVTVSWNSGALT:sp P01861   | 0.00187  | 67597.5  | 60340.5  | 71480.1  | 58661.9  | 40792.5  | 50353.3  | 43111.3  | 47238.5  | 39784.5  |
| 4696  | 4 | 736.621  | 2942.455 | 12.98 | YGPPCPCPAPEFLGGP:sp P01861    | 8.39E-05 | 23554.0  | 20088.6  | 21726.0  | 14061.8  | 11076.2  | 13072.5  | 27897.9  | 25612.0  | 23469.2  |
| 171   | 3 | 572.960  | 1715.858 | 14.90 | FTCTVHTDLPSPLK sp P01871      | 0.007228 | 253836.8 | 281329.4 | 245407.2 | 207048.0 | 253816.2 | 198301.0 | 200459.7 | 181416.8 | 232463.7 |
| 216   | 2 | 625.322  | 1248.630 | 16.06 | LICQATGFSPR sp P01871         | 0.033649 | 109828.4 | 131196.6 | 129926.3 | 95305.8  | 130828.3 | 97236.0  | 117416.2 | 119223.5 | 122112.1 |
| 223   | 2 | 515.297  | 1028.579 | 10.87 | QIQVSWLR sp P01871            | 0.005851 | 77751.4  | 101564.6 | 97213.6  | 68981.3  | 83046.0  | 70956.8  | 72033.1  | 82932.9  | 69625.0  |
| 252   | 2 | 809.408  | 1616.802 | 19.90 | QVGSGVTTDQVQAEAK sp P01871    | 0.000627 | 163535.1 | 224313.0 | 161291.2 | 136281.4 | 168191.5 | 134776.0 | 86298.5  | 82612.6  | 98125.1  |
| 272   | 2 | 455.215  | 908.415  | 6.94  | DGFFGNPR sp P01871            | 0.00245  | 50337.1  | 59566.7  | 56041.1  | 38659.1  | 46816.1  | 38199.9  | 52028.0  | 50450.8  | 65666.8  |
| 307   | 2 | 386.720  | 771.425  | 1.43  | EQLNLR sp P01871              | 0.000545 | 28033.0  | 30382.5  | 29477.6  | 25274.9  | 27956.7  | 23764.8  | 25027.4  | 21993.8  | 23532.4  |
| 375   | 4 | 931.692  | 3722.737 | 20.69 | YFAHSILTVEEEWNTGE sp P01871   | 1.76E-06 | 406571.2 | 327774.2 | 417019.5 | 371312.7 | 331075.0 | 348221.3 | 140584.6 | 131374.6 | 111615.3 |
| 451   | 4 | 444.259  | 1773.009 | 2.15  | GVALHRPDVYLLPPAR sp P01871    | 0.011526 | 104472.1 | 139641.0 | 93614.0  | 76673.8  | 93443.2  | 75180.8  | 85685.2  | 91050.2  | 110305.5 |
| 533   | 2 | 450.769  | 899.524  | 7.31  | VSVFVPPR sp P01871            | 2.46E-05 | 54633.7  | 56747.5  | 53950.7  | 41545.3  | 42916.6  | 41704.5  | 43529.7  | 42045.1  | 48359.7  |
| 565   | 2 | 431.766  | 861.518  | 7.32  | VTSTLTIK sp P01871            | 8.09E-05 | 33335.1  | 35592.0  | 31013.4  | 24135.4  | 30270.9  | 24933.5  | 17189.0  | 17063.4  | 16914.8  |
| 584   | 5 | 842.606  | 4207.995 | 11.94 | YFAHSILTVEEEWNTGE sp P01871   | 4.68E-10 | 140827.2 | 141872.0 | 124651.7 | 62704.4  | 61686.1  | 67888.3  | 348254.1 | 336367.9 | 341527.3 |
| 657   | 5 | 546.479  | 2727.360 | 8.43  | YAATSQVLLPSKDVMMQG' sp P01871 | 0.023522 | 50135.2  | 67794.8  | 58534.7  | 40243.4  | 51996.2  | 36762.1  | 58784.1  | 58398.9  | 73977.6  |
| 663   | 2 | 428.233  | 854.451  | 7.48  | GQPLSPEK sp P01871            | 0.022391 | 35556.3  | 30769.5  | 36961.9  | 28259.0  | 23616.7  | 29636.8  | 27437.6  | 27944.5  | 29588.5  |
| 679   | 3 | 539.941  | 1616.803 | 11.83 | QVGSGVTTDQVQAEAK sp P01871    | 0.000265 | 34981.8  | 45685.2  | 35259.3  | 28342.2  | 29453.8  | 28469.4  | 18573.0  | 18349.2  | 20988.9  |
| 879   | 2 | 639.359  | 1276.703 | 16.11 | YAATSQVLLPSK sp P01871        | 1.73E-09 | 38173.5  | 40504.2  | 40073.5  | 30339.7  | 31041.3  | 28380.7  | 16670.5  | 16534.3  | 16705.6  |
| 934   | 4 | 694.847  | 2775.359 | 16.97 | YAATSQVLLPSKDVMMQG' sp P01871 | 0.009148 | 39575.2  | 51768.2  | 48740.4  | 38474.3  | 40745.3  | 47203.3  | 57306.2  | 58057.6  | 72560.8  |
| 1005  | 2 | 819.470  | 1636.926 | 11.95 | VFAIPPSFASIFLTK sp P01871     | 0.001274 | 147759.6 | 121943.9 | 123640.0 | 129536.6 | 103046.1 | 127086.8 | 88474.7  | 86411.0  | 74071.7  |
| 1228  | 3 | 490.562  | 1468.663 | 9.85  | DVMQGTDEHVVCK sp P01871       | 0.005038 | 23214.6  | 20083.7  | 23325.4  | 15866.5  | 12590.4  | 16584.9  | 10698.6  | 11086.6  | 11143.6  |

|       |   |          |          |       |                      |           |          |          |          |          |           |           |          |          |           |          |
|-------|---|----------|----------|-------|----------------------|-----------|----------|----------|----------|----------|-----------|-----------|----------|----------|-----------|----------|
| 1432  | 2 | 406.735  | 811.456  | 2.03  | QTISRPK              | sp P01871 | 0.001285 | 8672.0   | 8094.7   | 9557.2   | 7776.2    | 7378.0    | 7719.7   | 7713.5   | 7434.6    | 7958.1   |
| 1460  | 3 | 518.264  | 1551.770 | 9.29  | YVTSAPMPEPQAPGR      | sp P01871 | 7.72E-05 | 26174.7  | 30009.8  | 24472.7  | 16872.3   | 20397.5   | 17998.8  | 14101.5  | 15757.6   | 15540.5  |
| 1475  | 2 | 693.922  | 1385.830 | 13.06 | NVPLPVIAELPPK        | sp P01871 | 0.000288 | 193482.3 | 174820.1 | 184747.6 | 136330.0  | 123903.1  | 144094.5 | 156556.7 | 157604.9  | 136359.0 |
| 1480  | 3 | 417.217  | 1248.631 | 7.09  | LICQATGFSPR          | sp P01871 | 0.01017  | 9045.9   | 10275.4  | 10243.8  | 7637.8    | 9297.2    | 7750.0   | 8927.3   | 9612.2    | 9810.4   |
| 1886  | 2 | 506.784  | 1011.553 | 6.87  | QIQVSWLR             | sp P01871 | 0.000315 | 7885.9   | 6936.8   | 7593.3   | 6292.2    | 5964.7    | 7273.4   | 8572.3   | 8420.5    | 7850.2   |
| 2063  | 3 | 546.649  | 1636.926 | 16.11 | VFAIPPSFASIFLTK      | sp P01871 | 0.000994 | 35186.3  | 28251.0  | 31260.4  | 30852.3   | 23106.2   | 29274.2  | 19948.4  | 20594.1   | 17435.3  |
| 2160  | 2 | 441.715  | 881.415  | 6.07  | ESGPTTYK             | sp P01871 | 6.67E-05 | 38686.2  | 35279.2  | 42243.4  | 34953.2   | 30010.4   | 31608.5  | 23885.5  | 23855.1   | 23122.4  |
| 2192  | 3 | 644.661  | 1930.962 | 12.63 | EGKQVGSVTTDQVQAE     | sp P01871 | 2.47E-07 | 5773.9   | 3727.6   | 4179.2   | 2758.0    | 3538.0    | 2188.9   | 35863.1  | 39890.7   | 34920.4  |
| 2307  | 3 | 915.114  | 2742.319 | 22.38 | ESATITCLVTGFSPADVF   | sp P01871 | 0.000941 | 28523.7  | 27329.7  | 32655.6  | 33152.9   | 28140.8   | 32236.4  | 36738.1  | 35872.7   | 33669.1  |
| 2474  | 2 | 800.895  | 1599.776 | 17.90 | QVGSVTTDQVQAEAK      | sp P01871 | 7.52E-05 | 19348.1  | 22802.7  | 24744.3  | 17522.9   | 21778.9   | 17025.4  | 8850.0   | 9296.1    | 11314.5  |
| 2785  | 4 | 1053.006 | 4207.995 | 16.89 | YFAHSILTVEEEWNTGE    | sp P01871 | 2.83E-08 | 35754.4  | 33127.0  | 28645.2  | 11363.6   | 12659.5   | 14296.0  | 86930.3  | 84544.8   | 82745.9  |
| 3864  | 3 | 462.951  | 1385.831 | 11.32 | NVPLPVIAELPPK        | sp P01871 | 0.001136 | 30914.8  | 26482.8  | 30038.9  | 21836.2   | 18947.2   | 22813.4  | 23224.8  | 25233.1   | 21963.0  |
| 7487  | 2 | 808.846  | 1615.678 | 15.06 | ESDWLGQSMFTCR        | sp P01871 | 5.67E-05 | 1932.9   | 1378.0   | 1785.9   | 4949.6    | 4981.9    | 5737.3   | 763.2    | 1181.1    | 1100.5   |
| 21239 | 4 | 686.587  | 2742.319 | 14.66 | ESATITCLVTGFSPADVF   | sp P01871 | 0.027259 | 792.4    | 657.6    | 991.3    | 896.2     | 688.2     | 836.1    | 1065.8   | 1107.5    | 914.9    |
| 26043 | 4 | 1070.820 | 4279.253 | 3.19  | VFAIPPSFASIFLTKSTKLT | sp P01871 | 3.39E-05 | 3547.4   | 3148.6   | 4701.8   | 1447.7    | 1269.3    | 1274.8   | 3781.5   | 5155.6    | 5035.9   |
| 40762 | 3 | 298.820  | 893.437  | 2.14  | VQHPNGNK             | sp P01871 | 0.0296   | 816.8    | 159.5    | 147.4    | 789.6     | 801.4     | 623.5    | 192.6    | 298.7     | 168.7    |
| 64    | 2 | 918.479  | 1834.944 | 19.95 | QEPSQGTTFVAVTSILR    | sp P01876 | 0.048493 | 992146.2 | 797441.5 | 840272.8 | 785830.3  | 662289.0  | 730525.1 | 652990.7 | 731096.2  | 741465.5 |
| 100   | 3 | 865.048  | 2592.123 | 23.17 | DLCGCYSVSSVLPGCAEI   | sp P01876 | 0.003918 | 691078.6 | 434988.0 | 542777.5 | 436966.4  | 409886.4  | 476480.1 | 310175.4 | 309768.7  | 251444.4 |
| 211   | 4 | 573.040  | 2288.129 | 6.81  | KGDTFSCMVGHEALPLAI   | sp P01876 | 0.020965 | 187507.3 | 213123.6 | 168709.1 | 156868.4  | 145718.5  | 161836.3 | 183506.7 | 167698.7  | 207123.2 |
| 213   | 4 | 879.405  | 3513.592 | 18.44 | SAVQGPPERDLCGCYSV    | sp P01876 | 3.81E-08 | 291903.0 | 259863.9 | 305992.5 | 145334.9  | 168646.7  | 141576.3 | 819593.0 | 839972.2  | 775769.4 |
| 227   | 4 | 585.041  | 2336.134 | 11.81 | KGDTFSCMVGHEALPLAI   | sp P01876 | 0.028579 | 118864.4 | 133963.5 | 112113.2 | 127506.4  | 135515.3  | 122511.9 | 148614.1 | 141605.1  | 133274.5 |
| 282   | 3 | 514.248  | 1539.724 | 13.88 | DASGVFTWTPSSGK       | sp P01876 | 0.03871  | 74567.5  | 77743.7  | 72656.0  | 60800.8   | 66261.6   | 55856.3  | 95999.4  | 81860.5   | 68207.1  |
| 376   | 3 | 1056.844 | 3167.512 | 18.90 | NFPPSQDASGDLYTTSSC   | sp P01876 | 0.008971 | #####    | #####    | #####    | 1168159.0 | 1032524.9 | #####    | #####    | 1358872.0 | #####    |
| 510   | 5 | 458.633  | 2288.131 | 4.10  | KGDTFSCMVGHEALPLAI   | sp P01876 | 0.000736 | 53776.4  | 51303.0  | 52903.9  | 46498.2   | 44838.7   | 46644.8  | 55052.0  | 55143.0   | 60468.1  |
| 526   | 4 | 1195.348 | 4777.361 | 18.11 | VFPLSLCSTQPDGNVIAI   | sp P01876 | 0.037543 | 649930.7 | 630640.9 | 808220.2 | 736672.2  | 591418.6  | 720532.6 | 804813.1 | 892859.7  | 715925.3 |
| 541   | 2 | 909.966  | 1817.918 | 17.90 | QEPSQGTTFVAVTSILR    | sp P01876 | 0.032087 | 133800.4 | 134169.0 | 143416.2 | 151792.7  | 146264.2  | 145849.7 | 124100.5 | 143073.8  | 135827.9 |
| 712   | 4 | 792.885  | 3167.512 | 17.18 | NFPPSQDASGDLYTTSSC   | sp P01876 | 0.009971 | 471924.4 | 423435.3 | 444605.0 | 396243.6  | 336051.2  | 345681.1 | 447324.4 | 489670.0  | 418341.5 |
| 1725  | 4 | 649.038  | 2592.124 | 12.43 | DLCGCYSVSSVLPGCAEI   | sp P01876 | 0.001052 | 28435.7  | 20175.1  | 27847.8  | 19640.0   | 20951.5   | 19213.1  | 11878.5  | 14664.9   | 13658.2  |
| 1789  | 5 | 956.480  | 4777.362 | 19.42 | VFPLSLCSTQPDGNVIAI   | sp P01876 | 0.03415  | 148072.5 | 140433.9 | 179674.9 | 166196.2  | 129219.2  | 156595.5 | 158623.1 | 176815.8  | 146433.0 |
| 3053  | 4 | 691.615  | 2762.429 | 12.09 | QEPSQGTTFVAVTSILRV   | sp P01876 | 4.84E-06 | 26519.3  | 23994.8  | 27594.2  | 21315.5   | 18145.8   | 21088.3  | 11188.1  | 11257.9   | 10558.2  |
| 3411  | 4 | 1195.347 | 4777.357 | 18.55 | VFPLSLCSTQPDGNVIAI   | sp P01876 | 0.001067 | 94628.0  | 77025.3  | 97803.3  | 92545.2   | 78850.0   | 86590.6  | 66699.1  | 65659.5   | 64077.9  |
| 7126  | 3 | 879.118  | 2634.333 | 11.90 | QEPSQGTTFVAVTSILRV   | sp P01876 | 0.005485 | 10895.6  | 7373.4   | 10220.6  | 7687.9    | 6192.1    | 6908.5   | 4888.6   | 5541.1    | 3397.9   |
| 24274 | 6 | 797.234  | 4777.361 | 16.23 | VFPLSLCSTQPDGNVIAI   | sp P01876 | 0.002406 | 2720.7   | 2063.7   | 2928.0   | 2586.3    | 2207.3    | 2711.9   | 2155.7   | 2039.9    | 2195.2   |
| 30171 | 3 | 1593.459 | 4777.355 | 16.28 | VFPLSLCSTQPDGNVIAI   | sp P01876 | 0.003823 | 5227.6   | 4350.9   | 5442.1   | 5183.5    | 5064.6    | 5682.3   | 3694.9   | 3337.0    | 2931.5   |

|      |   |         |          |       |                    |           |          |          |          |          |          |          |          |          |          |          |
|------|---|---------|----------|-------|--------------------|-----------|----------|----------|----------|----------|----------|----------|----------|----------|----------|----------|
| 309  | 2 | 756.853 | 1511.691 | 18.95 | DASGATFTWTPSSGK    | sp P01877 | 7.79E-06 | 114961.6 | 120323.1 | 126510.8 | 120778.2 | 112101.7 | 128751.8 | 188132.1 | 167775.6 | 170906.6 |
| 829  | 4 | 988.192 | 3948.737 | 12.37 | DLCGCYSVSSVLPGCAQI | sp P01877 | 2.32E-05 | 126257.5 | 97489.6  | 114014.8 | 99475.1  | 87150.5  | 92713.2  | 48474.1  | 46590.7  | 46804.7  |
| 1958 | 5 | 975.048 | 4870.205 | 11.09 | SAVQGPPELDLCGCYSV  | sp P01877 | 3.48E-07 | 38453.1  | 37737.0  | 33995.7  | 21580.1  | 28309.9  | 21099.3  | 113082.8 | 121610.2 | 117840.7 |
| 1515 | 2 | 480.270 | 958.526  | 7.89  | TAVNALWGK          | sp P02042 | 0.040196 | 6530.4   | 7253.4   | 7203.3   | 7386.7   | 11159.2  | 7754.9   | 9659.4   | 8696.7   | 9955.1   |
| 457  | 4 | 605.566 | 2418.233 | 11.32 | EVDLKDYEDQQKQLEQV  | sp P02671 | 6.13E-06 | 45494.5  | 65502.7  | 50292.4  | 31062.4  | 32849.7  | 35699.9  | 107527.4 | 125884.4 | 107176.1 |
| 464  | 2 | 514.757 | 1027.499 | 7.05  | NSLFEYQK           | sp P02671 | 0.004584 | 27175.6  | 28831.5  | 34721.1  | 22245.2  | 26991.8  | 27581.3  | 38549.8  | 35936.2  | 39847.1  |
| 504  | 2 | 786.843 | 1571.672 | 18.90 | GGSTSYGTGSETESPR   | sp P02671 | 0.000648 | 96864.0  | 86817.5  | 90138.8  | 86260.3  | 69464.4  | 82365.4  | 62941.2  | 59677.0  | 58392.0  |
| 529  | 2 | 760.871 | 1519.728 | 15.11 | GLIDEVNQDFTNR      | sp P02671 | 0.000289 | 69642.9  | 59278.3  | 59831.3  | 50877.1  | 41789.1  | 44039.9  | 51240.9  | 53665.3  | 55249.5  |
| 538  | 2 | 505.760 | 1009.506 | 11.87 | VTSGSTTTTR         | sp P02671 | 0.004198 | 23892.8  | 22302.1  | 26433.1  | 20133.6  | 16005.6  | 19215.3  | 29208.9  | 46180.6  | 32779.0  |
| 697  | 2 | 464.778 | 927.541  | 7.07  | QLEQVIAK           | sp P02671 | 3.21E-05 | 21591.1  | 24013.2  | 21601.3  | 18747.0  | 20287.1  | 16839.0  | 10303.7  | 10936.2  | 10705.3  |
| 709  | 3 | 507.584 | 1519.729 | 10.13 | GLIDEVNQDFTNR      | sp P02671 | 0.001687 | 27914.8  | 22310.0  | 23572.6  | 20602.7  | 16766.4  | 17909.7  | 21885.2  | 25919.8  | 23893.5  |
| 726  | 3 | 501.253 | 1500.738 | 3.41  | MELERPGNEITR       | sp P02671 | 1.43E-05 | 19361.2  | 20147.1  | 19865.5  | 18842.7  | 23140.0  | 18866.3  | 34531.6  | 32858.5  | 36333.6  |
| 842  | 3 | 577.588 | 1729.742 | 10.18 | GDFSSANNRDNTYNR    | sp P02671 | 2.88E-09 | 20120.3  | 18291.6  | 20136.9  | 14213.8  | 14853.9  | 13625.2  | 52667.8  | 49867.9  | 53454.8  |
| 914  | 3 | 369.561 | 1105.663 | 7.23  | VQHIQLLQK          | sp P02671 | 0.001853 | 20281.6  | 24156.3  | 17683.7  | 14309.3  | 20805.3  | 15363.7  | 10180.5  | 9862.8   | 9929.4   |
| 1072 | 3 | 503.908 | 1508.703 | 7.40  | EVDLKDYEDQQK       | sp P02671 | 0.009663 | 23952.3  | 30193.0  | 26339.0  | 24831.1  | 30748.4  | 22016.1  | 17643.2  | 16730.2  | 19833.2  |
| 1129 | 4 | 669.521 | 2674.053 | 6.79  | HQSACKDSDWPFCSDEI  | sp P02671 | 8.25E-06 | 43675.4  | 33178.8  | 43098.7  | 25711.8  | 21019.1  | 26542.5  | 67625.6  | 70372.5  | 65745.8  |
| 1450 | 2 | 570.781 | 1139.547 | 15.06 | GSESGIFTNTK        | sp P02671 | 0.001963 | 13287.7  | 16433.1  | 12242.4  | 9706.5   | 11729.6  | 9869.8   | 17185.0  | 19717.2  | 17269.7  |
| 1908 | 3 | 807.084 | 2418.230 | 16.88 | EVDLKDYEDQQKQLEQV  | sp P02671 | 0.000162 | 14478.6  | 24470.6  | 16536.7  | 9738.4   | 12555.5  | 12732.1  | 35070.0  | 41883.7  | 31407.1  |
| 2019 | 3 | 485.252 | 1452.734 | 6.01  | MELERPGNEITR       | sp P02671 | 5.82E-06 | 11660.2  | 10410.1  | 11069.1  | 7906.9   | 8048.6   | 8130.7   | 13665.3  | 13375.3  | 13443.3  |
| 2033 | 3 | 481.268 | 1440.782 | 8.10  | MKPVPDLVPGNFK      | sp P02671 | 0.000652 | 14200.7  | 17811.0  | 13859.2  | 11327.2  | 13361.2  | 10644.0  | 21247.4  | 22346.1  | 29391.4  |
| 2293 | 3 | 655.289 | 1962.844 | 19.11 | NPSSAGSWNSGSSGPGI  | sp P02671 | 2.90E-05 | 16037.8  | 20664.4  | 19384.5  | 14890.0  | 15018.3  | 13548.0  | 8849.9   | 9641.8   | 9498.8   |
| 2616 | 4 | 472.476 | 1885.874 | 3.89  | HRHPDEAAFFDTASTGK  | sp P02671 | 2.37E-05 | 9030.4   | 10700.1  | 10429.9  | 7148.9   | 6017.8   | 6962.3   | 13742.1  | 15552.4  | 15985.1  |
| 2676 | 4 | 880.134 | 3516.505 | 11.51 | GGSTSYGTGSETESPRN  | sp P02671 | 1.95E-05 | 25014.6  | 19372.6  | 26280.6  | 15043.7  | 17677.4  | 15542.8  | 35772.2  | 41754.8  | 40481.7  |
| 2894 | 4 | 345.943 | 1379.743 | 6.44  | TVIGPDGHKEVTK      | sp P02671 | 0.001661 | 4479.4   | 3976.1   | 4747.9   | 3049.0   | 3049.1   | 3344.9   | 2941.1   | 2918.2   | 3163.2   |
| 2966 | 2 | 484.216 | 966.417  | 7.63  | GDFSSANNR          | sp P02671 | 0.000287 | 21422.7  | 19232.9  | 22824.2  | 18085.9  | 15380.6  | 16723.5  | 16053.1  | 15951.4  | 14700.9  |
| 3061 | 2 | 368.648 | 735.281  | 5.58  | CPSGCR             | sp P02671 | 0.012928 | 14360.9  | 12203.1  | 15375.1  | 11090.0  | 9935.5   | 12007.8  | 13991.9  | 14755.3  | 11189.2  |
| 3137 | 2 | 982.377 | 1962.740 | 15.90 | DSDWPFCSDEDWNYK    | sp P02671 | 4.04E-06 | 44159.7  | 39722.0  | 47303.7  | 37548.2  | 31868.9  | 34896.2  | 19154.4  | 18149.6  | 16821.5  |
| 3495 | 2 | 595.776 | 1189.538 | 14.02 | QFTSSTSYNR         | sp P02671 | 0.013569 | 6085.2   | 6987.2   | 6570.9   | 5010.9   | 4260.7   | 4752.6   | 5699.4   | 5120.3   | 4608.5   |
| 3516 | 4 | 497.258 | 1985.004 | 3.19  | NNKDSHSLTTNIMEILR  | sp P02671 | 0.04713  | 4454.7   | 7952.3   | 4770.4   | 4380.3   | 9056.2   | 4033.7   | 11235.0  | 11927.6  | 9736.5   |
| 3518 | 3 | 625.991 | 1874.952 | 7.29  | GLIDEVNQDFTNRINK   | sp P02671 | 6.95E-10 | 1193.4   | 1061.6   | 1219.9   | 772.6    | 903.5    | 730.6    | 26053.3  | 21333.4  | 20822.8  |
| 3636 | 2 | 391.676 | 781.336  | 3.14  | DNTYNR             | sp P02671 | 0.00629  | 10086.0  | 8254.2   | 9908.9   | 7920.7   | 6657.5   | 7895.1   | 4965.4   | 7993.4   | 5094.1   |
| 3669 | 3 | 367.549 | 1099.626 | 2.05  | RLEVDIDIK          | sp P02671 | 0.012686 | 2716.0   | 4958.4   | 3100.9   | 3122.7   | 5353.6   | 2666.4   | 1532.1   | 1562.8   | 2310.7   |
| 3833 | 3 | 655.254 | 1962.741 | 11.78 | DSDWPFCSDEDWNYK    | sp P02671 | 1.27E-05 | 16225.6  | 15521.8  | 18681.4  | 13100.2  | 10855.6  | 13810.5  | 7480.2   | 7335.6   | 6844.9   |
| 5093 | 3 | 577.916 | 1730.726 | 10.27 | GDFSSANNRDNTYNR    | sp P02671 | 0.000305 | 4784.1   | 4089.7   | 4464.5   | 4024.0   | 3551.7   | 4176.6   | 4741.1   | 4947.6   | 5261.0   |

|       |   |          |          |       |                    |           |          |          |          |          |          |          |          |          |          |          |
|-------|---|----------|----------|-------|--------------------|-----------|----------|----------|----------|----------|----------|----------|----------|----------|----------|----------|
| 6797  | 3 | 894.344  | 2680.009 | 17.64 | DSDWPFCSDEDWNYKCI  | sp P02671 | 1.11E-07 | 5288.5   | 4045.1   | 4358.1   | 1851.3   | 1098.4   | 1457.5   | 22011.3  | 23156.0  | 19198.1  |
| 12487 | 3 | 1043.474 | 3127.400 | 15.90 | EVVTSSEDCPEAMDL    | sp P02671 | 0.036221 | 4608.0   | 4111.3   | 3985.3   | 4071.1   | 3717.5   | 4408.4   | 2738.0   | 2334.6   | 2286.5   |
| 226   | 2 | 422.749  | 843.483  | 2.43  | SILENLR            | sp P02675 | 8.53E-05 | 38908.1  | 47692.9  | 40391.2  | 30688.4  | 30602.0  | 26288.0  | 51976.0  | 53164.5  | 62626.3  |
| 292   | 2 | 654.813  | 1307.612 | 17.06 | QGFGNVATNTDGGK     | sp P02675 | 0.000325 | 97233.5  | 89078.2  | 97368.6  | 72352.5  | 60255.3  | 73280.5  | 96306.8  | 85156.7  | 94099.8  |
| 304   | 5 | 817.610  | 4083.015 | 7.25  | KAPDAGGCLHADPDLGV  | sp P02675 | 0.003639 | 232715.1 | 233735.1 | 282582.9 | 194554.1 | 192135.9 | 219343.5 | 265691.5 | 218599.0 | 213615.1 |
| 386   | 2 | 620.264  | 1238.513 | 11.98 | EDGGGWYNR          | sp P02675 | 0.000693 | 57997.1  | 69438.7  | 57875.4  | 42350.2  | 41919.9  | 40400.2  | 73278.2  | 70267.2  | 57982.2  |
| 424   | 2 | 490.726  | 979.437  | 13.02 | QDGSVDFGR          | sp P02675 | 0.000383 | 30801.3  | 38702.7  | 34226.2  | 24346.4  | 22128.4  | 23367.1  | 35855.7  | 36010.4  | 45284.5  |
| 595   | 3 | 850.079  | 2547.216 | 20.91 | TPCTVSCNIPVVSQKECE | sp P02675 | 1.20E-05 | 75043.9  | 104950.0 | 75762.1  | 48419.9  | 45106.3  | 57911.4  | 179848.0 | 167057.4 | 179916.2 |
| 598   | 2 | 359.217  | 716.419  | 2.46  | ISQLTR             | sp P02675 | 8.32E-05 | 16795.1  | 14959.2  | 16295.3  | 11813.4  | 11507.6  | 12978.6  | 17166.1  | 19301.7  | 19378.5  |
| 665   | 2 | 893.400  | 1784.785 | 13.90 | NYCGLPGEYWLGNDK    | sp P02675 | 0.00262  | 103946.1 | 89503.1  | 85529.5  | 71287.3  | 67748.5  | 80635.0  | 61169.8  | 68902.1  | 64906.1  |
| 711   | 4 | 592.798  | 2367.163 | 12.60 | AHYGGFTVQNEANKYQI  | sp P02675 | 4.53E-05 | 39717.2  | 44260.0  | 39538.1  | 30100.7  | 37933.9  | 30227.4  | 77540.7  | 69518.2  | 81541.8  |
| 782   | 4 | 969.970  | 3875.850 | 6.62  | DNENVVNEYSSELEKHQI | sp P02675 | 4.22E-06 | 99172.4  | 88686.0  | 105347.7 | 76510.5  | 63100.2  | 70627.6  | 156510.0 | 147242.8 | 151202.7 |
| 991   | 3 | 512.580  | 1534.719 | 6.03  | AHYGGFTVQNEANK     | sp P02675 | 0.000175 | 27122.6  | 29840.4  | 25582.9  | 16656.7  | 18905.9  | 17887.0  | 25471.4  | 24191.2  | 24253.7  |
| 1088  | 2 | 426.235  | 850.456  | 4.21  | YQISVNK            | sp P02675 | 0.002823 | 11403.2  | 11259.9  | 9325.0   | 7739.7   | 8003.7   | 6998.0   | 9991.5   | 8191.7   | 8199.2   |
| 1201  | 2 | 516.786  | 1031.558 | 4.13  | IRPFFPQQ           | sp P02675 | 0.000804 | 27739.0  | 28113.0  | 27181.3  | 17448.7  | 21848.7  | 18282.9  | 28222.2  | 25029.4  | 30582.1  |
| 1256  | 3 | 651.007  | 1949.999 | 18.90 | EEAPSLRPAPPPISGGGY | sp P02675 | 7.53E-05 | 41422.5  | 54789.0  | 50552.4  | 30431.8  | 28455.2  | 28689.6  | 30983.5  | 28947.0  | 32825.8  |
| 1395  | 5 | 847.221  | 4231.068 | 1.46  | QVKDNENVVNEYSSELEI | sp P02675 | 2.33E-07 | 59984.7  | 57696.5  | 58933.7  | 33379.8  | 30912.3  | 35146.9  | 104615.5 | 93704.2  | 87616.3  |
| 1418  | 4 | 669.835  | 2675.310 | 11.87 | TPCTVSCNIPVVSQKECE | sp P02675 | 2.37E-06 | 25805.4  | 30788.6  | 23606.5  | 15212.1  | 19208.2  | 15758.9  | 61974.5  | 57117.4  | 75242.5  |
| 1429  | 3 | 828.739  | 2483.195 | 14.64 | NYCGLPGEYWLGNDKIS  | sp P02675 | 5.97E-06 | 20982.7  | 20740.0  | 25034.3  | 12757.9  | 12334.7  | 17136.8  | 54753.0  | 53859.2  | 51137.8  |
| 1559  | 4 | 559.556  | 2234.195 | 6.55  | KREEAPSLRPAPPPISGG | sp P02675 | 0.007233 | 24170.8  | 34109.8  | 23446.4  | 14775.3  | 20831.7  | 15903.0  | 25001.3  | 24390.8  | 30370.0  |
| 1675  | 3 | 709.701  | 2126.080 | 11.24 | HQLYIDETVNSNIPTNLR | sp P02675 | 6.30E-06 | 30331.5  | 27654.2  | 32911.9  | 22837.2  | 23977.1  | 23746.1  | 15168.6  | 16813.8  | 17284.3  |
| 1772  | 2 | 354.672  | 707.329  | 1.45  | WDPYK              | sp P02675 | 2.99E-06 | 4415.4   | 4865.5   | 4520.6   | 3254.5   | 3551.6   | 2963.9   | 6334.6   | 6375.5   | 6357.6   |
| 1822  | 4 | 585.049  | 2336.168 | 12.57 | KGGETSEMYLIQPDSSVK | sp P02675 | 0.031306 | 18928.0  | 22091.4  | 17364.0  | 15368.8  | 21782.2  | 13377.6  | 24787.3  | 23756.2  | 26425.5  |
| 1932  | 3 | 370.185  | 1107.532 | 7.54  | QDGSVDFGRK         | sp P02675 | 2.21E-07 | 3990.5   | 3793.8   | 4476.6   | 3065.7   | 2771.5   | 2905.0   | 6850.7   | 7017.7   | 7115.7   |
| 2123  | 4 | 597.050  | 2384.173 | 12.80 | KGGETSEMYLIQPDSSVK | sp P02675 | 0.000145 | 11541.6  | 15440.5  | 11642.9  | 12604.8  | 13379.7  | 12332.0  | 23782.2  | 21343.6  | 26863.1  |
| 2275  | 5 | 447.846  | 2234.194 | 1.43  | KREEAPSLRPAPPPISGG | sp P02675 | 1.46E-06 | 11569.6  | 12339.4  | 10740.0  | 7591.2   | 7398.6   | 6780.7   | 13640.8  | 13754.7  | 14951.5  |
| 2408  | 3 | 359.519  | 1075.535 | 1.37  | ECEEIIRK           | sp P02675 | 0.008533 | 3712.8   | 3516.4   | 3954.2   | 2849.3   | 2839.1   | 3069.7   | 3463.1   | 3219.4   | 2983.6   |
| 2602  | 3 | 513.897  | 1538.670 | 8.93  | LESDVSAQMEYCR      | sp P02675 | 0.004055 | 9707.4   | 9954.3   | 9358.1   | 6175.1   | 6840.0   | 6517.8   | 9178.4   | 8308.5   | 7182.4   |
| 2644  | 4 | 1021.760 | 4083.012 | 10.61 | KAPDAGGCLHADPDLGV  | sp P02675 | 0.008707 | 32722.4  | 37120.7  | 40803.0  | 27536.7  | 30062.3  | 33533.1  | 35685.4  | 32762.2  | 29344.7  |
| 2689  | 2 | 490.705  | 979.395  | 10.13 | CHAANPNGR          | sp P02675 | 1.49E-05 | 6862.9   | 5083.4   | 6361.2   | 6108.0   | 5368.2   | 6083.1   | 10483.3  | 10098.2  | 10583.5  |
| 2815  | 2 | 834.862  | 1667.710 | 14.06 | YYWGGQYTWDMAK      | sp P02675 | 0.000363 | 9276.6   | 9100.3   | 10602.1  | 10886.0  | 10189.0  | 9479.9   | 14916.6  | 17415.0  | 12450.9  |
| 4253  | 3 | 515.571  | 1543.691 | 3.20  | HGTDDGVVWMNWK      | sp P02675 | 0.000375 | 2971.9   | 3113.9   | 3160.2   | 3514.6   | 2993.0   | 2819.4   | 5092.3   | 4408.6   | 4497.6   |
| 4805  | 4 | 944.206  | 3772.795 | 15.96 | QGFGNVATNTDGGKNYCC | sp P02675 | 3.39E-07 | 2539.3   | 2841.6   | 2326.1   | 916.5    | 380.6    | 898.8    | 37580.0  | 35973.0  | 30298.7  |
| 4807  | 4 | 555.534  | 2218.106 | 10.09 | MGPTELLIEMEDWKGDK  | sp P02675 | 1.63E-07 | 3357.9   | 2908.9   | 2982.6   | 3340.5   | 2783.9   | 3118.7   | 9686.7   | 11645.5  | 10810.6  |

|       |   |          |          |       |                     |           |          |          |          |          |          |          |          |          |          |          |
|-------|---|----------|----------|-------|---------------------|-----------|----------|----------|----------|----------|----------|----------|----------|----------|----------|----------|
| 4953  | 2 | 490.213  | 978.411  | 9.87  | CHAANPNGR           | sp P02675 | 0.000225 | 6532.1   | 5686.2   | 6830.2   | 4648.2   | 3756.9   | 4211.1   | 7257.2   | 7367.1   | 8004.4   |
| 6022  | 3 | 1025.802 | 3074.385 | 20.52 | QGFGNVATNTDGKNYCC   | sp P02675 | 9.56E-08 | 5522.7   | 4821.6   | 5386.4   | 2282.5   | 1731.7   | 2573.7   | 23630.6  | 25311.2  | 21201.3  |
| 8565  | 2 | 419.696  | 837.378  | 1.36  | GSWYSMR             | sp P02675 | 0.00094  | 1838.9   | 1475.1   | 1829.2   | 1353.5   | 989.6    | 1257.8   | 2188.5   | 2302.2   | 2338.9   |
| 12723 | 4 | 792.628  | 3166.484 | 15.27 | NSVDELNNNVEAVSQTS   | sp P02675 | 0.002558 | 2613.7   | 2563.3   | 2467.9   | 2352.9   | 1847.7   | 2664.4   | 2755.1   | 2596.7   | 2455.3   |
| 14365 | 2 | 490.704  | 979.394  | 8.66  | CHAANPNGR           | sp P02675 | 0.000526 | 3046.6   | 2576.5   | 3213.1   | 2628.8   | 1883.3   | 2535.6   | 5117.0   | 5123.9   | 4454.6   |
| 260   | 5 | 743.355  | 3711.740 | 5.60  | VAQLEAQCQEPCKDTVQ   | sp P02679 | 0.000233 | 219510.3 | 241050.9 | 193657.0 | 150670.5 | 131176.1 | 162597.5 | 256383.1 | 238172.1 | 280237.1 |
| 296   | 3 | 736.353  | 2206.036 | 14.90 | EGFGHLSPTGTTEFWLGI  | sp P02679 | 0.000276 | 161323.8 | 137146.1 | 136351.7 | 113979.5 | 98140.1  | 104294.9 | 129487.6 | 141259.3 | 146772.1 |
| 382   | 3 | 806.366  | 2416.077 | 18.11 | FGSYCPTTCGIADFLSTY  | sp P02679 | 0.00861  | 149517.5 | 128276.0 | 124981.2 | 118109.4 | 95194.3  | 126963.8 | 177014.3 | 165618.1 | 140229.8 |
| 393   | 3 | 431.924  | 1292.751 | 13.06 | QSGLYFIKPLK         | sp P02679 | 0.003982 | 39462.7  | 52250.1  | 36082.4  | 27370.9  | 28077.4  | 27657.7  | 38839.8  | 41136.0  | 47088.3  |
| 430   | 4 | 692.839  | 2767.328 | 11.59 | VAQLEAQCQEPCKDTVQ   | sp P02679 | 0.001335 | 108204.0 | 89999.1  | 98008.2  | 103747.7 | 98222.8  | 95890.1  | 73705.8  | 68855.3  | 78656.8  |
| 443   | 3 | 497.920  | 1490.740 | 13.06 | YEASILTHDSSIR       | sp P02679 | 0.006965 | 46179.7  | 54982.8  | 42787.9  | 38624.8  | 50029.2  | 40291.9  | 32123.8  | 27575.2  | 34765.1  |
| 445   | 3 | 345.514  | 1033.521 | 8.79  | VGPEADKYR           | sp P02679 | 7.65E-06 | 28947.1  | 25436.5  | 26724.9  | 22416.0  | 19980.3  | 22405.6  | 34712.2  | 34439.7  | 34417.3  |
| 473   | 3 | 561.659  | 1681.955 | 10.63 | IHLISTQSAIPYALR     | sp P02679 | 0.018645 | 51041.5  | 62748.2  | 57552.1  | 44846.1  | 62678.8  | 46034.9  | 41123.3  | 37795.5  | 32666.0  |
| 496   | 4 | 387.209  | 1544.809 | 7.58  | LTIGEGQQQHHLGGAK    | sp P02679 | 1.30E-05 | 58622.9  | 52641.2  | 55738.2  | 48756.4  | 43032.7  | 41081.1  | 54639.3  | 52874.9  | 51932.6  |
| 508   | 2 | 757.368  | 1512.722 | 15.11 | YLQEIYNSNNQK        | sp P02679 | 0.002135 | 59801.9  | 79517.2  | 66908.6  | 43263.1  | 59643.7  | 48968.2  | 80819.6  | 85325.8  | 94648.0  |
| 555   | 2 | 559.268  | 1116.522 | 7.24  | VELEDWNGR           | sp P02679 | 0.007753 | 36278.6  | 36963.1  | 34470.1  | 25825.0  | 32016.2  | 25396.3  | 28305.4  | 26044.6  | 30767.4  |
| 605   | 2 | 597.747  | 1193.480 | 6.57  | DNCCILDER           | sp P02679 | 0.000211 | 33017.4  | 34460.0  | 31648.5  | 22465.5  | 23472.4  | 19996.9  | 39116.6  | 39236.9  | 52906.4  |
| 633   | 2 | 426.225  | 850.435  | 1.33  | NWIIQYK             | sp P02679 | 0.000746 | 19900.1  | 21618.8  | 18983.6  | 15832.4  | 17624.5  | 15855.3  | 21734.1  | 21229.4  | 24251.7  |
| 881   | 4 | 618.822  | 2471.257 | 4.34  | AIQLTYNPDESSKPNMID  | sp P02679 | 0.003267 | 45170.9  | 59170.7  | 42329.9  | 35921.6  | 39332.6  | 29066.2  | 67567.9  | 58097.7  | 56739.2  |
| 911   | 3 | 362.842  | 1085.505 | 4.12  | TSTADYAMFK          | sp P02679 | 0.000173 | 12163.3  | 13533.5  | 12973.4  | 8862.0   | 8793.2   | 8583.7   | 12924.4  | 11726.7  | 11006.3  |
| 959   | 2 | 638.870  | 1275.725 | 7.89  | QSGLYFIKPLK         | sp P02679 | 0.006588 | 19107.6  | 19769.2  | 23681.7  | 18235.8  | 16993.7  | 19276.9  | 27584.3  | 25874.2  | 22216.4  |
| 1213  | 4 | 503.979  | 2011.888 | 4.38  | CHAGHLNGVYYQGGTYS   | sp P02679 | 0.00443  | 19631.9  | 24952.8  | 20670.3  | 15942.8  | 15303.0  | 15603.7  | 20396.3  | 23793.0  | 30723.1  |
| 1290  | 3 | 505.248  | 1512.722 | 5.63  | YLQEIYNSNNQK        | sp P02679 | 2.06E-06 | 13973.8  | 15012.3  | 16188.8  | 10716.3  | 10004.3  | 10947.0  | 18853.8  | 18881.3  | 19411.0  |
| 1396  | 3 | 336.851  | 1007.531 | 7.39  | LDGSVDFKK           | sp P02679 | 0.000439 | 6302.6   | 5878.4   | 5530.7   | 4677.8   | 4790.3   | 4644.1   | 6325.4   | 6594.7   | 6911.9   |
| 1528  | 2 | 559.761  | 1117.507 | 6.36  | VELEDWNGR           | sp P02679 | 0.000313 | 24274.3  | 23823.4  | 22574.1  | 19597.5  | 23075.2  | 19286.3  | 15213.9  | 12188.2  | 13845.1  |
| 1588  | 2 | 567.762  | 1133.509 | 8.55  | TSTADYAMFK          | sp P02679 | 0.000484 | 9208.2   | 8902.0   | 9436.0   | 8861.6   | 11488.9  | 9193.9   | 13572.3  | 12741.1  | 14534.8  |
| 1798  | 3 | 840.761  | 2519.262 | 18.17 | AIQLTYNPDESSKPNMID  | sp P02679 | 0.000359 | 28601.1  | 24490.9  | 29149.9  | 27564.7  | 35280.8  | 28171.1  | 58360.1  | 54370.3  | 47145.1  |
| 1829  | 3 | 515.943  | 1544.808 | 7.45  | LTIGEGQQQHHLGGAK    | sp P02679 | 0.035905 | 6537.1   | 5511.7   | 7192.2   | 4584.6   | 4840.1   | 6472.8   | 7555.8   | 6239.4   | 8180.5   |
| 1884  | 2 | 482.214  | 962.414  | 6.37  | DCQDIANK            | sp P02679 | 0.002376 | 20311.6  | 17188.4  | 20490.0  | 16775.6  | 13542.6  | 16633.2  | 10870.8  | 10846.8  | 11482.4  |
| 1931  | 2 | 1209.045 | 2416.074 | 19.90 | FGSYCPTTCGIADFLSTY  | sp P02679 | 0.030078 | 54242.0  | 44872.3  | 46926.9  | 41578.3  | 35731.8  | 45433.7  | 69420.1  | 60449.3  | 48968.6  |
| 1941  | 3 | 888.082  | 2661.223 | 16.94 | ANQQFLVYCEIDGSGNG   | sp P02679 | 0.00546  | 36242.1  | 33755.4  | 35078.7  | 35395.3  | 29170.9  | 36771.5  | 34384.4  | 33165.0  | 30233.2  |
| 2250  | 2 | 440.724  | 879.434  | 5.93  | LDGSVDFK            | sp P02679 | 0.000136 | 6244.2   | 6956.0   | 6365.6   | 2966.5   | 3797.8   | 3190.8   | 4935.0   | 5171.3   | 4523.6   |
| 2945  | 2 | 517.768  | 1033.521 | 6.46  | VGPEADKYR           | sp P02679 | 1.61E-05 | 6362.1   | 6093.7   | 5989.8   | 5503.5   | 5465.5   | 5569.5   | 7138.9   | 7026.4   | 7491.6   |
| 3573  | 4 | 696.124  | 2780.465 | 11.70 | IHLISTQSAIPYALRVELE | sp P02679 | 2.70E-08 | 5891.4   | 5113.4   | 4667.6   | 2644.7   | 2400.2   | 1804.8   | 27723.9  | 26840.2  | 27115.0  |



|       |   |          |          |       |                      |           |          |         |         |         |         |         |         |         |         |         |
|-------|---|----------|----------|-------|----------------------|-----------|----------|---------|---------|---------|---------|---------|---------|---------|---------|---------|
| 3894  | 2 | 757.861  | 1513.707 | 14.06 | YLQEIYNSNNQK         | sp P02679 | 0.000425 | 6262.1  | 6782.6  | 6920.6  | 5521.5  | 7487.0  | 6710.0  | 10187.3 | 8442.2  | 9084.9  |
| 4512  | 4 | 696.370  | 2781.450 | 7.68  | IHLISTQSAIPYALRVELEI | sp P02679 | 2.90E-08 | 3871.4  | 3549.8  | 4216.8  | 2654.7  | 2070.5  | 2071.1  | 15722.5 | 17486.0 | 16295.7 |
| 7541  | 4 | 592.300  | 2365.172 | 7.47  | MLEEIMKYEASILTHDSSI  | sp P02679 | 1.01E-07 | 1750.2  | 1584.9  | 1903.8  | 1758.5  | 1437.9  | 1372.1  | 7171.3  | 7325.7  | 6179.3  |
| 520   | 3 | 604.636  | 1810.887 | 14.64 | IVLGQEQDSYGGKFDR     | sp P02743 | 0.000305 | 47082.4 | 45984.8 | 42817.3 | 45503.9 | 47409.4 | 47299.2 | 58829.3 | 52939.1 | 54589.1 |
| 682   | 2 | 382.727  | 763.439  | 3.27  | VVFVPR               | sp P02743 | 0.002626 | 12507.5 | 12887.1 | 12939.2 | 13219.1 | 11447.1 | 12015.4 | 14979.4 | 16005.5 | 17290.9 |
| 1066  | 2 | 578.805  | 1155.595 | 14.02 | VEYSLYIGR            | sp P02743 | 0.034335 | 16117.6 | 19416.5 | 17430.0 | 20049.4 | 21360.6 | 19290.4 | 12240.2 | 12033.3 | 18003.9 |
| 1275  | 2 | 643.899  | 1285.783 | 10.96 | GYVIKPLVWV           | sp P02743 | 0.003842 | 19368.8 | 17223.5 | 19243.1 | 24793.4 | 21072.3 | 24857.0 | 17333.7 | 17213.3 | 14401.0 |
| 1348  | 2 | 703.840  | 1405.665 | 16.06 | AYSLSYNTQGR          | sp P02743 | 5.08E-05 | 22143.4 | 28538.4 | 29583.2 | 29812.0 | 32136.3 | 31982.1 | 13135.2 | 15302.3 | 13245.0 |
| 1444  | 2 | 406.201  | 810.388  | 3.64  | AYSDLR               | sp P02743 | 0.000438 | 8383.6  | 7352.9  | 7639.0  | 8778.7  | 8784.1  | 8048.3  | 6558.1  | 6251.2  | 6233.4  |
| 2688  | 2 | 621.878  | 1241.741 | 9.24  | LSPIYNLVPVK          | sp P02748 | 0.000106 | 5906.3  | 5237.0  | 5561.7  | 9615.4  | 8223.0  | 8205.5  | 10235.8 | 11186.7 | 9273.4  |
| 5564  | 2 | 728.361  | 1454.707 | 10.54 | AIEDYINEFSVR         | sp P02748 | 0.001819 | 3416.5  | 2368.4  | 3198.8  | 5094.0  | 3740.4  | 4764.2  | 6450.8  | 6637.6  | 5243.6  |
| 6255  | 3 | 930.485  | 2788.432 | 21.99 | GTVIDVDFVNWASSIND    | sp P02748 | 0.001767 | 4582.2  | 3787.1  | 5707.1  | 10632.3 | 8340.3  | 8562.5  | 7077.1  | 8117.3  | 7076.5  |
| 19937 | 4 | 698.116  | 2788.434 | 16.27 | GTVIDVDFVNWASSIND    | sp P02748 | 0.014429 | 642.6   | 462.0   | 698.2   | 1269.2  | 815.1   | 1113.5  | 930.2   | 983.4   | 873.0   |
| 1370  | 2 | 495.281  | 988.547  | 6.50  | VAAGAFQGLR           | sp P02750 | 0.001009 | 7054.2  | 7451.6  | 6016.6  | 8062.2  | 10712.9 | 7796.1  | 12373.9 | 12198.4 | 15812.4 |
| 1407  | 2 | 358.719  | 715.424  | 1.47  | VLDLTR               | sp P02750 | 0.000283 | 3739.2  | 4571.4  | 3863.9  | 3916.3  | 5726.6  | 4189.7  | 8589.3  | 8565.3  | 10722.0 |
| 1494  | 2 | 406.736  | 811.457  | 1.43  | GPLQLER              | sp P02750 | 1.60E-06 | 4320.5  | 5109.3  | 4645.8  | 4817.1  | 5905.2  | 5388.3  | 10878.5 | 10870.3 | 11129.3 |
| 1617  | 3 | 384.876  | 1151.606 | 7.54  | ALGHLDLSGNR          | sp P02750 | 0.002238 | 4236.2  | 5579.5  | 4643.4  | 4953.0  | 6984.7  | 5188.1  | 9176.6  | 8603.0  | 11903.2 |
| 1635  | 4 | 740.903  | 2959.581 | 15.78 | LQELHLSSNGLESLSPEF   | sp P02750 | 0.00136  | 24859.1 | 17620.0 | 23546.4 | 29062.0 | 21510.0 | 30832.3 | 48052.9 | 47069.7 | 42469.5 |
| 2095  | 2 | 450.780  | 899.546  | 7.56  | GQTLAVAK             | sp P02750 | 0.01911  | 4755.9  | 5560.2  | 4623.4  | 5106.9  | 6930.6  | 4979.7  | 6985.9  | 7446.0  | 7911.4  |
| 2296  | 2 | 485.257  | 968.499  | 3.27  | YLFLNGNK             | sp P02750 | 2.27E-05 | 3313.9  | 3576.1  | 3540.4  | 4161.3  | 4816.2  | 4829.5  | 8541.2  | 9068.9  | 6814.6  |
| 2642  | 3 | 632.009  | 1893.004 | 11.51 | ENQLEVLEVSWLHGLK     | sp P02750 | 3.23E-05 | 8621.2  | 8322.7  | 9951.2  | 14006.5 | 13648.3 | 13956.6 | 6906.5  | 6572.7  | 5462.8  |
| 3855  | 3 | 829.042  | 2484.106 | 20.11 | DGFDISGNPWICDQNLSC   | sp P02750 | 0.019813 | 11570.7 | 9033.4  | 10213.5 | 13352.5 | 13207.5 | 14192.9 | 10344.4 | 10729.8 | 10491.1 |
| 4822  | 3 | 679.702  | 2036.083 | 13.16 | TLDLGENQLETLPDCLR    | sp P02750 | 0.000155 | 16884.1 | 15126.0 | 17580.8 | 20111.7 | 15001.5 | 19072.3 | 30342.0 | 30746.3 | 29151.1 |
| 8338  | 3 | 780.779  | 2339.314 | 17.38 | NALTGLPPGLFQASATLD   | sp P02750 | 1.12E-06 | 3728.1  | 3535.1  | 3795.8  | 7453.4  | 7027.1  | 8181.6  | 2335.3  | 1861.1  | 1850.6  |
| 9616  | 3 | 270.821  | 809.442  | 2.22  | LHLEGNK              | sp P02750 | 0.001762 | 793.3   | 683.4   | 823.7   | 924.7   | 784.6   | 889.6   | 1545.9  | 1538.5  | 1561.3  |
| 10841 | 4 | 1054.583 | 4214.303 | 9.77  | NALTGLPPGLFQASATLD   | sp P02750 | 1.23E-05 | 4502.5  | 3058.4  | 4198.5  | 6029.7  | 4528.4  | 5584.8  | 11554.5 | 13876.4 | 12744.7 |
| 15088 | 2 | 1243.059 | 2484.103 | 17.90 | DGFDISGNPWICDQNLSC   | sp P02750 | 0.001832 | 3646.1  | 2868.1  | 2805.7  | 4344.5  | 3857.0  | 5019.1  | 2860.8  | 2745.0  | 2750.2  |
| 3070  | 3 | 551.267  | 1650.779 | 7.22  | LLCQCLGFGSGHFR       | sp P02751 | 0.000169 | 9909.0  | 13032.8 | 9590.3  | 6516.3  | 6582.9  | 5887.3  | 5702.1  | 5292.1  | 6963.1  |
| 7288  | 3 | 643.021  | 1926.041 | 13.67 | FLATTPNSLLVSWQPPR    | sp P02751 | 0.000583 | 6063.6  | 5254.3  | 6483.0  | 4137.5  | 2918.5  | 4384.7  | 3256.0  | 3429.4  | 2561.1  |
| 8798  | 3 | 355.518  | 1063.532 | 7.28  | VGDTYERPK            | sp P02751 | 0.00217  | 2048.7  | 1805.7  | 2102.1  | 1451.7  | 1258.5  | 1404.4  | 960.1   | 1001.8  | 1073.9  |
| 12687 | 3 | 642.689  | 1925.045 | 15.11 | VTWAPPSIDLTNFLVR     | sp P02751 | 8.09E-06 | 3023.9  | 2986.7  | 3210.0  | 2360.0  | 1765.1  | 2068.6  | 1470.9  | 1378.6  | 1265.4  |
| 17112 | 3 | 842.128  | 2523.361 | 22.38 | DLEVVAATPTSLISWDAL   | sp P02751 | 1.28E-06 | 2768.2  | 2153.9  | 2656.0  | 2489.1  | 1882.8  | 2397.0  | 501.8   | 474.6   | 327.9   |
| 3951  | 2 | 599.818  | 1197.621 | 6.65  | YWGVASFQK            | sp P02753 | 0.000439 | 4366.6  | 3774.7  | 3901.7  | 5418.6  | 4568.4  | 5220.0  | 3190.6  | 3022.1  | 3445.5  |
| 5078  | 3 | 434.892  | 1301.653 | 6.69  | QRQEELCLAR           | sp P02753 | 2.81E-05 | 2046.0  | 2064.7  | 2155.0  | 2266.8  | 2569.3  | 2356.9  | 1338.7  | 1452.9  | 1311.3  |

|      |   |          |          |       |                    |           |          |          |          |          |          |          |          |          |          |          |
|------|---|----------|----------|-------|--------------------|-----------|----------|----------|----------|----------|----------|----------|----------|----------|----------|----------|
| 456  | 2 | 607.341  | 1212.667 | 14.06 | TVAACNLPIVR        | sp P02760 | 0.004089 | 46023.3  | 45725.6  | 40103.3  | 57503.5  | 73256.6  | 54922.3  | 70980.7  | 59031.9  | 83899.4  |
| 574  | 2 | 704.886  | 1407.758 | 13.62 | AFIQLWAFDAVK       | sp P02760 | 0.001086 | 45516.5  | 41663.5  | 45915.7  | 65116.8  | 50949.0  | 70966.4  | 67925.0  | 73803.2  | 70745.9  |
| 650  | 2 | 854.879  | 1707.743 | 15.95 | EYCGVPGDGDEELLR    | sp P02760 | 2.64E-05 | 73294.9  | 80763.2  | 81124.7  | 101047.5 | 109226.8 | 106284.5 | 129023.0 | 117419.8 | 123605.0 |
| 2665 | 2 | 483.711  | 965.407  | 7.27  | ECLQTCR            | sp P02760 | 0.012549 | 6259.2   | 5323.1   | 6491.5   | 11156.8  | 7976.9   | 10187.9  | 5159.6   | 5805.4   | 5139.5   |
| 3082 | 2 | 836.367  | 1670.719 | 12.00 | CVLFPYGGCQGNNGNK   | sp P02760 | 4.29E-05 | 12044.5  | 14176.0  | 12087.0  | 18957.8  | 20481.0  | 20238.1  | 12581.9  | 13183.1  | 9906.6   |
| 3543 | 3 | 470.260  | 1407.758 | 8.05  | AFIQLWAFDAVK       | sp P02760 | 0.009431 | 3783.4   | 2974.6   | 3438.8   | 4699.8   | 3653.6   | 5381.0   | 4730.2   | 5438.1   | 5043.0   |
| 3590 | 3 | 776.015  | 2325.022 | 9.60  | CVLFPYGGCQGNNGNKFY | sp P02760 | 0.001888 | 6780.4   | 7023.9   | 8741.9   | 10111.5  | 10712.8  | 7966.4   | 13912.6  | 13996.0  | 13301.2  |
| 3843 | 3 | 373.503  | 1117.488 | 5.72  | FYSEKECR           | sp P02760 | 0.001468 | 2022.4   | 1804.4   | 2217.2   | 3315.4   | 2447.0   | 2935.5   | 4741.1   | 5139.7   | 4426.3   |
| 4162 | 3 | 649.615  | 1945.823 | 11.29 | GVCEETSGAYEKTDTDGI | sp P02760 | 0.000673 | 8261.6   | 6090.5   | 7358.7   | 9700.1   | 8293.5   | 9436.5   | 5018.9   | 5333.2   | 5325.6   |
| 4739 | 4 | 693.557  | 2770.197 | 9.65  | CVLFPYGGCQGNNGNKFY | sp P02760 | 1.75E-05 | 3309.2   | 3284.6   | 2547.6   | 2770.5   | 1362.3   | 3227.3   | 18893.0  | 20574.5  | 24670.6  |
| 25   | 4 | 438.995  | 1751.949 | 7.98  | YVGGQEHFALLILR     | sp P02763 | 0.002236 | 338949.2 | 440603.6 | 345982.5 | 387615.9 | 547383.6 | 385780.4 | 712844.2 | 679690.8 | 708016.7 |
| 38   | 3 | 414.212  | 1239.616 | 12.77 | SDVVYTDWKK         | sp P02763 | 5.14E-05 | 149478.9 | 184611.1 | 137319.0 | 165241.1 | 205412.9 | 165564.0 | 381298.6 | 336680.7 | 393014.1 |
| 106  | 3 | 584.990  | 1751.949 | 13.95 | YVGGQEHFALLILR     | sp P02763 | 0.006213 | 168168.9 | 235726.5 | 176118.4 | 182062.8 | 299665.3 | 194506.9 | 401029.3 | 332045.1 | 399048.6 |
| 108  | 2 | 620.815  | 1239.615 | 13.87 | SDVVYTDWKK         | sp P02763 | 0.001226 | 109152.7 | 156296.7 | 93506.5  | 128357.5 | 193596.5 | 132416.8 | 290732.7 | 282869.5 | 349370.5 |
| 114  | 2 | 556.768  | 1111.521 | 12.29 | SDVVYTDWK          | sp P02763 | 0.015501 | 111025.8 | 133951.5 | 131712.5 | 140933.3 | 181403.9 | 136462.5 | 156170.7 | 148909.4 | 206345.4 |
| 240  | 2 | 871.907  | 1741.800 | 16.06 | EQLGEFYEALDCLR     | sp P02763 | 1.29E-06 | 203462.3 | 201113.4 | 214324.6 | 297998.5 | 254666.1 | 290407.5 | 110604.0 | 123144.7 | 110876.9 |
| 437  | 3 | 581.608  | 1741.802 | 10.28 | EQLGEFYEALDCLR     | sp P02763 | 3.33E-06 | 62736.9  | 59046.5  | 70098.0  | 88368.5  | 77442.9  | 89490.1  | 38933.3  | 39326.5  | 39265.6  |
| 857  | 5 | 972.664  | 4858.286 | 11.15 | TYMLAFDVNDEKNWGLS  | sp P02763 | 1.06E-05 | 158672.2 | 127516.7 | 165604.2 | 237093.7 | 214491.5 | 236279.0 | 373364.9 | 431808.4 | 434206.0 |
| 1024 | 5 | 618.306  | 3086.493 | 11.28 | TYMLAFDVNDEKNWGLS  | sp P02763 | 9.59E-07 | 42521.7  | 44258.9  | 41534.8  | 60479.7  | 57972.6  | 62061.2  | 30540.2  | 26681.0  | 27175.8  |
| 1608 | 4 | 858.917  | 3431.641 | 12.23 | NWGLSVYADKPETTKEQ  | sp P02763 | 3.10E-05 | 49622.4  | 39128.8  | 43356.8  | 57575.2  | 53485.6  | 56832.0  | 31522.2  | 28770.7  | 34528.1  |
| 1871 | 4 | 772.630  | 3086.492 | 20.52 | TYMLAFDVNDEKNWGLS  | sp P02763 | 5.37E-08 | 30505.0  | 32931.2  | 30049.0  | 42105.7  | 42956.6  | 42903.3  | 21248.4  | 21033.3  | 21618.1  |
| 2074 | 3 | 570.290  | 1707.849 | 8.41  | NWGLSVYADKPETTK    | sp P02763 | 0.012276 | 12058.3  | 15334.0  | 13379.9  | 16203.9  | 24096.9  | 15941.6  | 13578.0  | 12389.8  | 14651.1  |
| 5835 | 3 | 694.352  | 2080.035 | 11.69 | EQLGEFYEALDCLRIPK  | sp P02763 | 2.37E-08 | 2069.1   | 1629.8   | 1776.7   | 2204.4   | 1630.0   | 2181.7   | 23503.1  | 25918.4  | 23227.9  |
| 7656 | 5 | 963.059  | 4810.261 | 13.38 | TYMLAFDVNDEKNWGLS  | sp P02763 | 0.003362 | 17126.1  | 11165.9  | 15347.3  | 16857.3  | 11822.4  | 16121.9  | 26784.5  | 29023.2  | 24472.9  |
| 299  | 2 | 424.221  | 846.428  | 6.09  | CNLLAEK            | sp P02765 | 0.000688 | 38058.9  | 35905.4  | 39975.9  | 44270.9  | 41914.3  | 39808.8  | 44891.9  | 45193.3  | 48702.7  |
| 394  | 2 | 401.682  | 801.350  | 3.48  | QYGFCK             | sp P02765 | 0.023566 | 25523.2  | 25967.8  | 22904.4  | 25859.8  | 30496.2  | 24467.0  | 30168.3  | 32669.4  | 27220.0  |
| 455  | 5 | 971.892  | 4854.422 | 17.97 | HTLNQIDEVKVWPQQPSI | sp P02765 | 0.006463 | 265200.5 | 192096.2 | 253769.6 | 234592.0 | 242533.2 | 304268.1 | 393923.0 | 375731.5 | 345223.6 |
| 610  | 3 | 1121.855 | 3362.544 | 12.95 | QPNCCDPETEEAALVAID | sp P02765 | 0.000677 | 232978.8 | 208218.9 | 270062.9 | 296804.8 | 224400.7 | 251135.6 | 144598.2 | 143425.9 | 130004.6 |
| 718  | 4 | 508.257  | 2028.998 | 3.08  | QLKEHAVEGDCDFQLLK  | sp P02765 | 0.007089 | 33861.3  | 35552.5  | 31562.0  | 38947.3  | 43870.4  | 36993.1  | 36221.4  | 42208.8  | 36598.2  |
| 989  | 3 | 554.260  | 1659.758 | 13.06 | EHAVEGDCDFQLLK     | sp P02765 | 0.00034  | 28793.3  | 36214.9  | 25689.2  | 28601.1  | 30804.8  | 28432.5  | 17523.1  | 15617.2  | 14900.7  |
| 1000 | 3 | 671.664  | 2011.970 | 13.70 | QLKEHAVEGDCDFQLLK  | sp P02765 | 0.006313 | 23858.4  | 31873.4  | 28059.0  | 27813.7  | 30922.3  | 26595.4  | 37780.5  | 39973.1  | 42018.7  |
| 1060 | 3 | 860.441  | 2578.302 | 16.38 | AQLVPLPPSTYVEFTVSG | sp P02765 | 0.003878 | 223873.3 | 192915.8 | 208604.8 | 248452.4 | 209896.3 | 240728.3 | 183455.6 | 179464.3 | 166878.9 |
| 1697 | 3 | 399.547  | 1195.620 | 4.97  | HTLNQIDEVK         | sp P02765 | 6.27E-06 | 6574.1   | 8170.7   | 8197.8   | 8848.9   | 8214.8   | 9858.4   | 3190.1   | 3716.4   | 3328.0   |
| 1705 | 1 | 830.409  | 829.402  | 1.44  | CNLLAEK            | sp P02765 | 0.001037 | 13994.1  | 17190.0  | 15168.0  | 17980.4  | 23098.8  | 17947.1  | 13415.7  | 14754.6  | 12115.9  |

|       |   |          |          |       |                               |          |          |          |          |          |          |          |          |          |          |
|-------|---|----------|----------|-------|-------------------------------|----------|----------|----------|----------|----------|----------|----------|----------|----------|----------|
| 1899  | 3 | 1226.611 | 3676.811 | 17.69 | VWPQQPSGELFEIEIDTLI sp P02765 | 3.69E-06 | 114797.8 | 92277.3  | 108240.9 | 159773.9 | 125324.3 | 139667.5 | 47405.4  | 46638.5  | 42588.6  |
| 2076  | 4 | 920.211  | 3676.814 | 18.90 | VWPQQPSGELFEIEIDTLI sp P02765 | 8.94E-06 | 73200.2  | 62326.6  | 75977.6  | 96014.0  | 77858.4  | 83375.5  | 36127.1  | 33305.4  | 29348.4  |
| 2218  | 4 | 841.644  | 3362.546 | 19.18 | QPNCCDDPETEEAALVAID sp P02765 | 0.000236 | 41590.6  | 36282.8  | 43377.5  | 50134.1  | 40415.0  | 45361.7  | 25705.8  | 26126.0  | 22397.0  |
| 2433  | 2 | 598.817  | 1195.620 | 12.09 | HTLNQIDEVK sp P02765          | 7.84E-06 | 7002.6   | 9971.9   | 8332.6   | 9465.2   | 11373.0  | 11312.6  | 2925.1   | 3424.9   | 2754.7   |
| 3156  | 4 | 611.564  | 2442.225 | 11.88 | QLKEHAVEGDCDFQLLKI sp P02765  | 1.21E-05 | 3558.3   | 5675.6   | 2941.2   | 2289.7   | 3672.2   | 2057.9   | 23833.9  | 25691.1  | 36344.0  |
| 3310  | 6 | 810.079  | 4854.427 | 14.18 | HTLNQIDEVKVWPQQPS sp P02765   | 0.002317 | 21915.0  | 16766.3  | 21766.7  | 21425.6  | 21153.2  | 25751.9  | 35392.9  | 33514.6  | 29881.5  |
| 3505  | 3 | 1093.888 | 3278.642 | 7.70  | AQLVPLPPSTYVEFTVSG sp P02765  | 2.53E-11 | 3824.4   | 3619.1   | 3715.7   | 1575.9   | 1620.2   | 2127.4   | 120235.0 | 115493.6 | 109604.5 |
| 4293  | 2 | 360.183  | 718.351  | 1.39  | EATEAAK sp P02765             | 0.011823 | 12572.0  | 10977.6  | 13212.7  | 18097.3  | 14932.4  | 18256.3  | 15135.2  | 15570.2  | 12065.6  |
| 4341  | 3 | 489.213  | 1464.617 | 15.80 | CDSSPDAEDVRK sp P02765        | 0.00013  | 3420.0   | 2989.6   | 3752.1   | 3714.0   | 3209.9   | 3375.9   | 2489.0   | 2292.2   | 2301.2   |
| 4879  | 4 | 607.307  | 2425.199 | 14.83 | QLKEHAVEGDCDFQLLKI sp P02765  | 3.84E-09 | 2589.1   | 2959.7   | 2570.2   | 1505.1   | 1563.8   | 1721.5   | 19107.4  | 17854.8  | 14897.5  |
| 7637  | 4 | 820.669  | 3278.645 | 15.65 | AQLVPLPPSTYVEFTVSG sp P02765  | 3.68E-09 | 782.1    | 606.9    | 659.6    | 146.1    | 242.8    | 124.3    | 28447.4  | 26580.6  | 23662.8  |
| 22298 | 3 | 1122.184 | 3363.530 | 10.86 | QPNCCDDPETEEAALVAID sp P02765 | 2.89E-06 | 2607.3   | 2251.7   | 2732.9   | 3122.6   | 3160.2   | 3477.1   | 1362.4   | 1271.5   | 1117.7   |
| 22678 | 3 | 1122.183 | 3363.528 | 14.90 | QPNCCDDPETEEAALVAID sp P02765 | 1.15E-05 | 3426.9   | 3107.4   | 3535.3   | 5424.7   | 4158.5   | 5094.0   | 1704.5   | 1226.3   | 1445.6   |
| 378   | 2 | 697.816  | 1393.617 | 17.11 | AADDTWEPFASGK sp P02766       | 0.010034 | 73066.9  | 83548.1  | 72362.9  | 76429.8  | 75457.1  | 66380.4  | 63612.8  | 60968.5  | 54160.0  |
| 389   | 4 | 785.886  | 3139.515 | 17.52 | TSESGELHGLTTEEEFVE sp P02766  | 0.009326 | 217977.4 | 177252.6 | 210961.4 | 209134.6 | 181836.8 | 201669.6 | 161626.7 | 149634.5 | 143550.9 |
| 554   | 3 | 456.259  | 1365.755 | 12.21 | GSPAINVAHVFR sp P02766        | 0.000334 | 40606.1  | 44245.0  | 39630.9  | 40805.6  | 54665.2  | 40850.1  | 29222.3  | 25493.6  | 31553.1  |
| 1056  | 4 | 613.558  | 2450.203 | 3.76  | ALGISPFHEHAEVFTANI sp P02766  | 0.00101  | 43909.1  | 51516.3  | 46011.8  | 44799.6  | 60780.6  | 51215.8  | 31327.6  | 29029.1  | 41134.9  |
| 2253  | 3 | 819.056  | 2454.148 | 16.17 | TSESGELHGLTTEEEFVE sp P02766  | 5.30E-07 | 25029.9  | 24338.6  | 21868.6  | 26703.2  | 23159.9  | 28700.1  | 6684.2   | 8009.9   | 7228.6   |
| 3299  | 2 | 1245.145 | 2488.276 | 16.91 | YTIAALLSPYSYSTTAVVT sp P02766 | 0.028959 | 21839.8  | 20316.1  | 25409.7  | 28042.7  | 34529.8  | 24353.2  | 21737.7  | 20338.2  | 18324.2  |
| 232   | 2 | 575.312  | 1148.609 | 9.90  | LVNEVTEFAK sp P02768          | 0.00042  | 113791.5 | 100054.7 | 84639.2  | 74039.9  | 88642.2  | 75717.5  | 48874.9  | 44163.0  | 52784.1  |
| 268   | 3 | 682.371  | 2044.091 | 15.90 | VFDEFKPLVEEPQNLIK sp P02768   | 0.01082  | 180655.2 | 111191.6 | 152403.3 | 117155.7 | 100094.9 | 143624.3 | 94734.7  | 87129.2  | 68249.3  |
| 276   | 2 | 722.326  | 1442.637 | 16.06 | YICENQDSISSK sp P02768        | 6.08E-06 | 128473.8 | 145990.7 | 126238.2 | 90227.5  | 94730.5  | 88363.8  | 87542.8  | 85831.3  | 79871.1  |
| 280   | 2 | 395.240  | 788.466  | 4.41  | LVTDLTK sp P02768             | 8.60E-06 | 32805.2  | 35214.3  | 31675.4  | 24750.5  | 30906.5  | 23578.5  | 18301.8  | 18892.5  | 18264.5  |
| 329   | 2 | 464.251  | 926.488  | 5.95  | YLYEIAR sp P02768             | 0.007481 | 39355.6  | 50681.8  | 50640.4  | 31163.0  | 43745.9  | 33873.3  | 31282.1  | 26732.6  | 32861.1  |
| 337   | 3 | 358.853  | 1073.537 | 3.63  | LDELRDEGK sp P02768           | 3.57E-05 | 34835.7  | 27739.1  | 32623.8  | 24723.2  | 21911.3  | 23801.2  | 18967.4  | 15576.7  | 16958.2  |
| 343   | 2 | 686.288  | 1370.561 | 15.06 | AAFTECCQAADK sp P02768        | 1.90E-08 | 117041.7 | 118720.2 | 107680.0 | 76968.1  | 86400.9  | 82507.0  | 36124.1  | 38656.7  | 39603.2  |
| 361   | 2 | 569.753  | 1137.492 | 7.42  | CCTESLVNR sp P02768           | 1.41E-07 | 56318.5  | 58087.3  | 52677.7  | 42873.2  | 41102.0  | 38625.6  | 23355.4  | 22928.7  | 23481.0  |
| 392   | 2 | 749.794  | 1497.573 | 17.06 | TCVADESAENCDK sp P02768       | 0.000127 | 101497.8 | 88008.3  | 113806.0 | 77620.7  | 65295.0  | 82570.0  | 46858.0  | 46672.1  | 38971.0  |
| 401   | 3 | 547.318  | 1638.934 | 13.90 | KVPQVSTPTLVEVSR sp P02768     | 0.000249 | 75894.1  | 96789.4  | 88392.5  | 64215.8  | 69198.5  | 54772.8  | 47584.4  | 47287.7  | 53482.5  |
| 441   | 2 | 480.786  | 959.557  | 5.60  | FQNALLVR sp P02768            | 3.33E-07 | 44863.3  | 55122.4  | 45708.9  | 34628.5  | 35339.5  | 29575.8  | 11500.9  | 12170.1  | 13111.5  |
| 454   | 2 | 500.807  | 999.599  | 11.90 | QTALVELVK sp P02768           | 0.01454  | 37082.1  | 52543.8  | 35376.0  | 23078.8  | 33819.7  | 22671.0  | 22148.4  | 22205.7  | 25722.3  |
| 458   | 2 | 492.748  | 983.482  | 7.51  | TYETTLEK sp P02768            | 8.56E-05 | 44000.1  | 37081.2  | 40084.9  | 31430.8  | 36140.3  | 27209.2  | 17991.0  | 21217.5  | 19303.4  |
| 459   | 4 | 407.688  | 1626.722 | 6.89  | ADDKETCFAEEGKK sp P02768      | 1.45E-06 | 43960.3  | 41376.7  | 41896.6  | 30234.6  | 26395.4  | 29223.2  | 27489.0  | 27375.6  | 28865.0  |
| 491   | 3 | 409.541  | 1225.601 | 6.16  | FKDLGEENFK sp P02768          | 0.001615 | 30558.4  | 42619.0  | 31865.1  | 21920.8  | 28078.0  | 22537.2  | 18848.1  | 19138.7  | 20255.1  |

|      |   |         |          |       |                      |           |          |         |          |          |         |         |         |         |         |         |
|------|---|---------|----------|-------|----------------------|-----------|----------|---------|----------|----------|---------|---------|---------|---------|---------|---------|
| 532  | 2 | 507.304 | 1012.594 | 15.27 | LVAASQAALGL          | sp P02768 | 0.002073 | 33352.6 | 38135.8  | 37128.5  | 24390.8 | 21674.7 | 25875.7 | 23195.5 | 27394.9 | 21646.9 |
| 535  | 3 | 518.205 | 1551.593 | 13.06 | CCAAADPHECYAK        | sp P02768 | 0.001172 | 57185.7 | 46738.8  | 60236.9  | 38971.8 | 37838.1 | 40970.4 | 32332.1 | 34577.3 | 32377.0 |
| 569  | 5 | 517.830 | 2584.116 | 5.82  | VHTECCHGDLLLECADDR   | sp P02768 | 0.011962 | 52641.8 | 71334.1  | 57077.9  | 46713.0 | 54308.1 | 38927.2 | 38725.5 | 36009.0 | 45573.7 |
| 579  | 4 | 647.036 | 2584.115 | 10.76 | VHTECCHGDLLLECADDR   | sp P02768 | 0.002704 | 73361.4 | 115463.3 | 78766.6  | 57305.9 | 92452.4 | 52207.0 | 33179.5 | 28923.3 | 38692.2 |
| 603  | 2 | 440.724 | 879.434  | 6.32  | AEFAEVSK             | sp P02768 | 0.000208 | 21280.0 | 20759.5  | 19302.3  | 15613.0 | 17606.6 | 13378.2 | 9804.7  | 10881.3 | 11496.4 |
| 732  | 3 | 637.650 | 1909.928 | 10.49 | RPCFSALEVDETYVPK     | sp P02768 | 8.61E-09 | 86327.7 | 96948.2  | 100669.9 | 63897.4 | 75207.9 | 69826.0 | 18690.6 | 19075.6 | 19006.7 |
| 764  | 4 | 475.505 | 1897.990 | 7.84  | RHPYFYAPELFFAK       | sp P02768 | 0.001749 | 37131.1 | 32989.6  | 40944.0  | 26811.7 | 21040.8 | 27217.6 | 24704.7 | 24174.0 | 21541.7 |
| 820  | 3 | 432.216 | 1293.625 | 5.06  | AVMDDFAAFVEK         | sp P02768 | 6.35E-07 | 21152.9 | 22243.6  | 20834.4  | 12304.9 | 12752.3 | 12296.0 | 12047.2 | 11369.0 | 12339.0 |
| 887  | 3 | 339.851 | 1016.532 | 5.76  | SLHTLFGDK            | sp P02768 | 8.87E-06 | 14316.0 | 20339.6  | 14944.6  | 11061.4 | 14678.8 | 10371.3 | 3330.0  | 3154.5  | 3901.2  |
| 900  | 3 | 489.953 | 1466.837 | 9.96  | RHPDYSVLLLLR         | sp P02768 | 0.03971  | 25250.5 | 51535.8  | 29060.1  | 16405.1 | 34427.9 | 21105.8 | 14434.2 | 13205.0 | 16554.2 |
| 909  | 2 | 386.724 | 771.432  | 3.51  | AACLLPK              | sp P02768 | 1.16E-07 | 24011.5 | 25574.3  | 24277.5  | 16804.4 | 17287.1 | 16320.4 | 10522.5 | 10392.4 | 11653.1 |
| 928  | 3 | 543.248 | 1626.722 | 13.99 | ADDKETCFAEEGKK       | sp P02768 | 4.64E-08 | 33128.8 | 31693.5  | 31487.3  | 22040.3 | 20617.8 | 22530.4 | 18882.8 | 17818.6 | 18477.9 |
| 984  | 5 | 528.052 | 2635.223 | 4.43  | QEPERNECFLQHKDDNP    | sp P02768 | 0.000136 | 70570.8 | 89736.7  | 68350.0  | 46169.7 | 56545.3 | 47412.1 | 37795.6 | 39546.1 | 38792.4 |
| 1003 | 4 | 483.766 | 1931.034 | 7.08  | SLHTLFGDKLCTVATLR    | sp P02768 | 0.001017 | 27120.2 | 35625.9  | 27077.7  | 16062.4 | 25768.3 | 17113.3 | 13163.6 | 12185.0 | 9934.2  |
| 1021 | 2 | 829.381 | 1656.748 | 17.06 | QNCLEFQLGEYK         | sp P02768 | 1.05E-07 | 67427.6 | 69838.8  | 52849.6  | 42109.8 | 42826.0 | 44526.3 | 13414.8 | 11223.1 | 11944.0 |
| 1073 | 4 | 623.328 | 2489.283 | 17.11 | ALVLIIFAQYLQQC PFEDI | sp P02768 | 0.000169 | 42171.8 | 49991.3  | 42452.4  | 38061.0 | 28986.8 | 35178.2 | 24087.4 | 22897.0 | 19313.5 |
| 1145 | 4 | 637.048 | 2544.163 | 7.69  | EFNAETFTFHADICTLSEK  | sp P02768 | 9.99E-07 | 44919.3 | 49985.3  | 47783.6  | 32400.2 | 38132.3 | 36173.3 | 15653.9 | 16493.6 | 12890.3 |
| 1160 | 3 | 516.271 | 1545.792 | 5.84  | LKECCEKPLLEK         | sp P02768 | 0.000477 | 27731.7 | 28053.9  | 26361.4  | 20882.6 | 21110.5 | 17713.7 | 22801.3 | 20849.1 | 15694.9 |
| 1220 | 4 | 367.717 | 1466.837 | 3.10  | RHPDYSVLLLLR         | sp P02768 | 0.014447 | 14183.7 | 20763.6  | 15273.7  | 10756.4 | 13544.2 | 9704.2  | 8008.4  | 8538.2  | 10103.0 |
| 1298 | 3 | 633.670 | 1897.990 | 11.06 | RHPYFYAPELFFAK       | sp P02768 | 0.002547 | 31831.5 | 28469.6  | 35535.6  | 22269.5 | 25770.8 | 23368.2 | 21141.0 | 24936.3 | 19663.1 |
| 1330 | 3 | 830.768 | 2489.281 | 21.90 | ALVLIIFAQYLQQC PFEDI | sp P02768 | 0.00058  | 50436.9 | 66711.9  | 50509.7  | 49303.1 | 36545.2 | 46018.5 | 28883.1 | 27776.5 | 23242.9 |
| 1371 | 2 | 768.290 | 1534.566 | 13.12 | CCAAADPHECYAK        | sp P02768 | 0.000798 | 31704.3 | 37928.3  | 33420.8  | 26760.4 | 35530.5 | 24042.7 | 17421.6 | 14328.7 | 17704.4 |
| 1372 | 3 | 867.105 | 2598.294 | 21.64 | QNCLEFQLGEYK FQNAI   | sp P02768 | 1.62E-06 | 36543.3 | 28706.1  | 34521.9  | 19358.8 | 15180.9 | 15943.8 | 43805.8 | 42024.7 | 36427.4 |
| 1400 | 5 | 683.126 | 3410.596 | 10.07 | TCVADESAENCDKSLHTL   | sp P02768 | 2.87E-08 | 22683.9 | 31269.7  | 24686.8  | 9304.6  | 9446.4  | 8716.8  | 56284.4 | 60680.9 | 50877.0 |
| 1557 | 4 | 655.557 | 2618.197 | 11.73 | QEPERNECFLQHKDDNP    | sp P02768 | 5.04E-05 | 37279.8 | 39472.7  | 34804.0  | 28832.6 | 35625.2 | 31253.2 | 18826.0 | 16210.3 | 19715.8 |
| 1618 | 2 | 537.776 | 1073.537 | 6.07  | LDEL RDEGK           | sp P02768 | 4.02E-06 | 13290.0 | 10915.7  | 11885.4  | 8624.3  | 9147.4  | 8624.5  | 5748.7  | 4726.8  | 5281.2  |
| 1644 | 2 | 671.822 | 1341.630 | 14.06 | AVMDDFAAFVEK         | sp P02768 | 0.010765 | 14954.9 | 12971.5  | 13600.2  | 14781.3 | 9153.6  | 12870.8 | 11441.6 | 10464.4 | 10885.0 |
| 1784 | 3 | 553.257 | 1656.750 | 9.78  | QNCLEFQLGEYK         | sp P02768 | 9.59E-08 | 20555.7 | 20136.7  | 17519.0  | 12976.0 | 11144.4 | 12837.5 | 4599.8  | 3989.6  | 4230.2  |
| 2107 | 4 | 659.813 | 2635.223 | 11.39 | QEPERNECFLQHKDDNP    | sp P02768 | 0.008344 | 37019.9 | 56187.0  | 33231.1  | 23598.7 | 37023.6 | 25269.2 | 18361.1 | 21036.1 | 22118.7 |
| 2337 | 3 | 481.886 | 1442.637 | 6.92  | YICENQDSISSK         | sp P02768 | 5.24E-05 | 6878.2  | 8445.5   | 7995.8   | 5566.2  | 5224.5  | 5370.3  | 5884.6  | 5068.1  | 5626.8  |
| 2384 | 3 | 840.077 | 2517.210 | 21.90 | MPCAEDYLSVVLNQLCVI   | sp P02768 | 2.58E-05 | 31929.6 | 25137.7  | 26425.0  | 24732.5 | 21589.2 | 27781.5 | 13565.8 | 13046.3 | 13047.4 |
| 2509 | 3 | 709.001 | 2123.982 | 18.70 | AAFTECCQAADKAACLLF   | sp P02768 | 1.59E-07 | 18518.7 | 19881.1  | 18635.6  | 8289.2  | 9792.5  | 8487.6  | 41545.8 | 42519.8 | 58847.8 |
| 2592 | 6 | 740.354 | 4436.081 | 7.12  | RPCFSALEVDETYV PKEF  | sp P02768 | 7.04E-06 | 25556.4 | 17738.3  | 25127.3  | 11938.2 | 11779.4 | 13278.5 | 31349.4 | 35416.5 | 30361.9 |
| 2726 | 3 | 581.637 | 1741.890 | 1.88  | HPYFYAPELFFAK        | sp P02768 | 1.87E-06 | 15153.8 | 14905.9  | 16029.5  | 9339.1  | 8007.9  | 9599.7  | 8082.2  | 8587.5  | 7946.5  |

|       |   |         |          |       |                     |           |          |          |          |          |          |          |          |          |          |          |
|-------|---|---------|----------|-------|---------------------|-----------|----------|----------|----------|----------|----------|----------|----------|----------|----------|----------|
| 2910  | 3 | 754.013 | 2259.017 | 15.95 | EFNAETFTFHADICTLSEK | sp P02768 | 3.54E-08 | 26327.9  | 28177.8  | 21950.5  | 22951.2  | 19707.8  | 21752.7  | 3525.8   | 3359.6   | 2649.7   |
| 2917  | 3 | 644.685 | 1931.033 | 12.70 | SLHTLFGDKLCTVATLR   | sp P02768 | 0.004849 | 11315.3  | 17345.1  | 10756.5  | 7202.8   | 12529.8  | 6844.0   | 5361.5   | 4942.6   | 3340.3   |
| 3083  | 3 | 435.878 | 1304.612 | 5.75  | ECCEKPLLEK          | sp P02768 | 7.61E-07 | 5166.9   | 5013.2   | 5044.4   | 3592.0   | 3393.0   | 3396.0   | 2680.7   | 2221.9   | 2691.3   |
| 3414  | 2 | 492.293 | 982.572  | 6.52  | QTALVELVK           | sp P02768 | 0.002608 | 3025.2   | 2930.0   | 3422.3   | 2578.8   | 2000.3   | 2783.9   | 2135.7   | 2028.3   | 1981.2   |
| 3681  | 5 | 888.223 | 4436.077 | 17.49 | RPCFSALEVDETYVPKEF  | sp P02768 | 1.83E-06 | 22861.4  | 15873.4  | 19214.1  | 8639.8   | 9811.8   | 9774.8   | 28847.8  | 31516.0  | 24840.7  |
| 4405  | 3 | 992.121 | 2973.340 | 19.78 | SHCIAEVENDEMPADLPS  | sp P02768 | 4.55E-05 | 29721.3  | 27799.1  | 28704.5  | 30707.0  | 28420.2  | 29833.1  | 14663.3  | 13667.9  | 9641.2   |
| 4938  | 4 | 380.450 | 1517.771 | 2.20  | LDELRDEGKASSAK      | sp P02768 | 2.83E-12 | 174.4    | 194.0    | 161.9    | 102.8    | 101.6    | 100.4    | 5942.7   | 6408.3   | 7260.2   |
| 4939  | 2 | 776.804 | 1551.593 | 14.12 | CCAAADPHECYAK       | sp P02768 | 5.70E-05 | 8326.8   | 7461.7   | 7875.8   | 5647.1   | 7088.9   | 6036.3   | 3404.8   | 3294.5   | 3396.8   |
| 5025  | 5 | 740.382 | 3696.872 | 17.56 | FKDLGEENFKALVLIAFAC | sp P02768 | 3.94E-05 | 13332.0  | 11110.2  | 12360.6  | 5714.0   | 4954.8   | 6954.4   | 9526.0   | 7414.7   | 7233.9   |
| 5985  | 2 | 812.398 | 1622.782 | 14.06 | DVFLGMFLYEYAR       | sp P02768 | 0.000118 | 10455.8  | 8633.3   | 10340.0  | 11949.2  | 8354.3   | 10048.2  | 4638.9   | 4531.2   | 4368.2   |
| 6552  | 3 | 541.935 | 1622.784 | 11.32 | DVFLGMFLYEYAR       | sp P02768 | 9.26E-05 | 4640.8   | 3689.5   | 4806.6   | 5529.3   | 3568.8   | 4467.8   | 1754.7   | 1641.6   | 1549.2   |
| 11496 | 3 | 861.430 | 2581.267 | 15.64 | QNCLEFEQLGEYKFNQAI  | sp P02768 | 5.80E-05 | 3486.4   | 2675.8   | 3345.6   | 2290.1   | 1866.3   | 1799.3   | 2929.6   | 3003.9   | 2814.3   |
| 13368 | 4 | 905.977 | 3619.880 | 8.12  | ALVLIAFAYLQCCPFEDI  | sp P02768 | 4.61E-08 | 3210.7   | 2913.8   | 2746.3   | 2053.8   | 1921.1   | 2392.9   | 14611.7  | 13960.8  | 11657.9  |
| 14003 | 5 | 925.882 | 4624.373 | 14.38 | VFDEFKPLVEEPQNLIKQI | sp P02768 | 3.21E-07 | 777.6    | 437.7    | 865.4    | 476.5    | 535.7    | 436.3    | 11944.4  | 9787.0   | 9614.4   |
| 9653  | 3 | 936.187 | 2805.541 | 11.20 | LAQKVPTADLEDVPLAE   | sp P02774 | 7.65E-05 | 6198.5   | 5100.7   | 6943.7   | 4144.7   | 2735.4   | 3435.2   | 12172.3  | 12553.8  | 10986.3  |
| 15241 | 3 | 789.430 | 2365.267 | 12.43 | VPTADLEDVPLAEDITNII | sp P02774 | 0.000177 | 3177.8   | 3299.2   | 2615.0   | 2259.9   | 1845.4   | 1885.0   | 1602.5   | 1365.6   | 1554.1   |
| 4483  | 3 | 606.607 | 1816.800 | 10.23 | EGTCPEAPTDECKPVK    | sp P02787 | 1.14E-06 | 7209.4   | 8576.4   | 7968.1   | 5980.9   | 6128.8   | 6145.0   | 3686.5   | 3831.5   | 3314.0   |
| 5982  | 3 | 724.372 | 2170.093 | 17.67 | SAGWNIPIGLLYCDLPEPI | sp P02787 | 7.15E-06 | 8269.2   | 7493.6   | 7724.4   | 6527.0   | 5662.8   | 6521.1   | 4702.0   | 4918.5   | 4781.9   |
| 73    | 2 | 610.808 | 1219.601 | 8.17  | NFPPSPVDAEFR        | sp P02790 | 0.002302 | 227562.0 | 191195.0 | 223144.8 | 286695.8 | 356698.4 | 316420.6 | 332729.9 | 371257.0 | 299196.7 |
| 87    | 2 | 748.344 | 1494.673 | 11.16 | YYCFQGNQFLR         | sp P02790 | 0.001584 | 227645.5 | 190003.0 | 228215.0 | 299975.5 | 361992.6 | 330297.0 | 345466.5 | 391318.8 | 309994.8 |
| 172   | 3 | 381.549 | 1141.627 | 9.07  | QGHNSVFLIK          | sp P02790 | 0.02705  | 63738.5  | 82864.2  | 68252.9  | 90101.8  | 113973.9 | 86323.9  | 95323.1  | 92318.3  | 112484.5 |
| 196   | 3 | 377.223 | 1128.647 | 1.45  | RLWWLDLK            | sp P02790 | 0.03283  | 46798.5  | 35314.2  | 42841.5  | 58797.8  | 50089.9  | 61051.9  | 48176.8  | 52011.7  | 50111.9  |
| 209   | 4 | 783.617 | 3130.440 | 22.83 | CSPHLVLSALTSDNHGAT  | sp P02790 | 0.004987 | 301753.7 | 242150.9 | 260584.1 | 426127.8 | 340732.0 | 436527.9 | 338420.2 | 339243.9 | 336970.3 |
| 230   | 3 | 788.728 | 2363.161 | 19.90 | LLQDEFPGIPSPLDAAVEI | sp P02790 | 7.46E-07 | 299075.1 | 271679.5 | 259850.3 | 475513.6 | 383165.1 | 407135.9 | 129932.5 | 134575.2 | 116220.8 |
| 248   | 3 | 499.232 | 1494.675 | 6.00  | YYCFQGNQFLR         | sp P02790 | 0.001271 | 56113.8  | 44819.3  | 57397.1  | 72465.3  | 74014.9  | 74920.1  | 79103.2  | 99742.6  | 81951.3  |
| 302   | 3 | 613.301 | 1836.883 | 18.90 | SGAQATWTELPWPHEK    | sp P02790 | 4.16E-06 | 195540.7 | 171190.1 | 190271.7 | 279098.3 | 336589.7 | 299078.0 | 110924.7 | 113282.5 | 94827.3  |
| 351   | 2 | 571.299 | 1140.584 | 14.06 | GGYTLVSGYPK         | sp P02790 | 2.53E-06 | 105080.8 | 107504.0 | 111330.3 | 164754.5 | 190927.5 | 162760.2 | 81697.7  | 74952.0  | 87049.6  |
| 358   | 4 | 945.710 | 3778.813 | 18.83 | SLGPNSCSANGPGLYLIH  | sp P02790 | 3.22E-08 | 132023.6 | 134703.0 | 164654.1 | 146595.9 | 135565.4 | 145757.2 | 508952.1 | 511255.5 | 502922.6 |
| 388   | 2 | 563.307 | 1124.599 | 6.30  | QGHNSVFLIK          | sp P02790 | 0.000931 | 32290.8  | 42749.0  | 38312.3  | 43643.5  | 49606.0  | 48963.2  | 59484.4  | 60810.6  | 69590.7  |
| 404   | 2 | 565.331 | 1128.647 | 1.43  | RLWWLDLK            | sp P02790 | 0.002938 | 40099.3  | 35645.5  | 34737.6  | 57245.1  | 47956.9  | 60763.3  | 40037.6  | 43699.7  | 40492.8  |
| 544   | 4 | 821.386 | 3281.516 | 17.90 | SLGPNSCSANGPGLYLIH  | sp P02790 | 0.044193 | 107938.3 | 100694.2 | 115452.7 | 146959.7 | 114227.9 | 139845.2 | 105434.6 | 103838.4 | 75897.3  |
| 653   | 3 | 365.496 | 1093.467 | 2.17  | DYFMPCPGR           | sp P02790 | 0.003039 | 23700.5  | 28489.0  | 23383.5  | 30499.6  | 31500.5  | 29062.8  | 31530.0  | 32853.4  | 34709.9  |
| 897   | 2 | 511.737 | 1021.459 | 7.20  | VDGALCMEK           | sp P02790 | 5.37E-07 | 11544.8  | 12243.6  | 12200.6  | 21414.9  | 24496.6  | 21303.0  | 9802.0   | 9536.4   | 9015.9   |
| 990   | 4 | 362.201 | 1444.774 | 6.55  | GDKVVVYPPEKK        | sp P02790 | 4.49E-05 | 37909.0  | 42738.2  | 34273.7  | 49384.8  | 54748.6  | 47637.6  | 65871.7  | 68592.7  | 67899.5  |

|       |   |          |          |       |                     |           |          |          |         |          |          |          |          |          |          |          |
|-------|---|----------|----------|-------|---------------------|-----------|----------|----------|---------|----------|----------|----------|----------|----------|----------|----------|
| 1039  | 4 | 805.625  | 3218.470 | 10.47 | DGWHWSPIAHQWPQGP    | sp P02790 | 3.18E-07 | 102784.3 | 80169.2 | 100718.9 | 183855.0 | 151254.4 | 180000.8 | 39523.5  | 39163.1  | 35069.3  |
| 1101  | 2 | 571.743  | 1141.471 | 9.50  | DYFMPCPGR           | sp P02790 | 9.79E-06 | 11850.3  | 12941.4 | 12192.7  | 21398.3  | 21521.4  | 20683.4  | 23405.2  | 24145.1  | 29721.1  |
| 1164  | 3 | 591.339  | 1770.996 | 15.11 | LYLVQGTQVYVFLTK     | sp P02790 | 1.37E-08 | 40867.8  | 33827.0 | 39598.3  | 69892.8  | 60202.3  | 67676.3  | 13488.7  | 12606.1  | 12582.4  |
| 1331  | 4 | 421.979  | 1683.888 | 1.35  | FDPVRGEVPPRYPR      | sp P02790 | 2.26E-06 | 66768.7  | 74667.3 | 67810.4  | 78943.7  | 96142.6  | 78987.4  | 167025.1 | 164373.6 | 190996.9 |
| 1401  | 3 | 381.877  | 1142.609 | 7.77  | QGHNSVFLIK          | sp P02790 | 0.004725 | 4966.6   | 5088.0  | 4930.4   | 7229.6   | 9339.9   | 7050.5   | 7607.1   | 6476.4   | 8510.4   |
| 1451  | 3 | 325.493  | 973.456  | 4.14  | VDGALCMEK           | sp P02790 | 0.019636 | 15542.0  | 13496.4 | 15918.4  | 20341.4  | 18078.9  | 20196.4  | 10967.5  | 11406.0  | 11846.4  |
| 1495  | 3 | 423.564  | 1267.670 | 8.13  | FDPVRGEVPPR         | sp P02790 | 3.10E-05 | 26106.8  | 28308.1 | 25714.2  | 38538.7  | 48454.7  | 38281.7  | 20474.1  | 20264.4  | 21712.2  |
| 1504  | 4 | 711.090  | 2840.330 | 15.91 | SGAQATWTELPWPHEK\   | sp P02790 | 1.46E-07 | 24012.1  | 24320.9 | 25588.4  | 39705.0  | 45840.2  | 36605.7  | 70115.7  | 67617.5  | 69147.2  |
| 1506  | 4 | 625.315  | 2497.232 | 14.38 | EVGTPHGIILDSVDAAFIC | sp P02790 | 0.024329 | 20880.2  | 14218.8 | 18102.9  | 27536.5  | 22837.9  | 23448.4  | 15697.0  | 18515.5  | 16965.3  |
| 1666  | 3 | 423.564  | 1267.670 | 1.45  | FDPVRGEVPPR         | sp P02790 | 0.001028 | 31999.9  | 34962.5 | 33043.6  | 40913.4  | 50620.4  | 42057.2  | 30633.1  | 29754.2  | 34277.6  |
| 1670  | 3 | 382.551  | 1144.630 | 5.67  | VWVYPPEKK           | sp P02790 | 0.006238 | 18289.7  | 20563.0 | 17188.5  | 24820.4  | 28555.2  | 23225.4  | 24988.2  | 24440.6  | 26421.0  |
| 1840  | 2 | 563.307  | 1124.600 | 6.06  | QGHNSVFLIK          | sp P02790 | 0.029967 | 8197.2   | 11582.6 | 8980.8   | 12446.6  | 17713.4  | 12619.3  | 13529.6  | 13512.7  | 17213.1  |
| 2156  | 3 | 512.266  | 1533.776 | 9.66  | WKNFSPVDAAFR        | sp P02790 | 5.05E-08 | 6077.4   | 6725.1  | 5652.5   | 7382.6   | 7999.3   | 6844.9   | 33061.1  | 31848.1  | 27922.6  |
| 2159  | 3 | 266.487  | 796.439  | 2.82  | LHIMAGR             | sp P02790 | 4.21E-06 | 1627.5   | 1461.3  | 1723.5   | 3525.6   | 3440.0   | 3242.0   | 2749.2   | 2642.3   | 2503.8   |
| 2245  | 2 | 886.505  | 1770.995 | 16.90 | LYLVQGTQVYVFLTK     | sp P02790 | 1.13E-08 | 35268.9  | 28550.0 | 31996.7  | 59802.1  | 53965.4  | 60383.7  | 10145.0  | 8780.7   | 8884.2   |
| 2388  | 5 | 1105.524 | 5522.586 | 10.80 | LLQDEFPGIPSPLDAAVE\ | sp P02790 | 5.87E-05 | 35648.9  | 36032.5 | 46369.0  | 60056.6  | 68137.3  | 62624.0  | 72281.6  | 79591.5  | 93191.5  |
| 2830  | 2 | 487.735  | 973.456  | 6.05  | VDGALCMEK           | sp P02790 | 0.003948 | 12655.2  | 11087.1 | 13137.8  | 17109.9  | 15284.3  | 17399.8  | 8480.7   | 8708.5   | 8528.5   |
| 3499  | 4 | 783.365  | 3129.431 | 12.46 | GECQAEGVLFFQGDREV   | sp P02790 | 2.81E-07 | 20649.7  | 16530.2 | 18214.6  | 27273.8  | 26942.5  | 27627.7  | 5644.5   | 5487.2   | 4249.0   |
| 3525  | 4 | 361.450  | 1441.771 | 6.91  | QGHNSVFLIKGDK       | sp P02790 | 1.20E-07 | 1524.8   | 1745.1  | 1552.1   | 2203.4   | 2255.4   | 2075.1   | 5981.1   | 6485.3   | 6263.7   |
| 4172  | 6 | 1016.677 | 6094.020 | 12.54 | DGWHWSPIAHQWPQGP    | sp P02790 | 3.09E-06 | 31409.2  | 29934.7 | 38986.2  | 23133.5  | 23459.7  | 23708.6  | 68695.8  | 71871.6  | 75681.6  |
| 4188  | 3 | 1060.152 | 3177.435 | 21.52 | GECQAEGVLFFQGDREV   | sp P02790 | 1.26E-07 | 15783.1  | 15269.0 | 15406.9  | 40068.6  | 38059.8  | 44460.5  | 7910.1   | 8909.6   | 6848.9   |
| 4946  | 4 | 389.706  | 1554.793 | 1.38  | SHKWDRELISER        | sp P02790 | 4.07E-09 | 688.9    | 671.8   | 770.4    | 854.0    | 949.9    | 877.5    | 8815.4   | 7616.2   | 7132.3   |
| 5279  | 3 | 504.897  | 1511.669 | 2.28  | DVRDYFMPCPGR        | sp P02790 | 2.78E-06 | 821.6    | 984.5   | 937.7    | 2027.0   | 1837.2   | 1515.5   | 6643.0   | 6797.6   | 4541.6   |
| 5387  | 5 | 559.473  | 2792.328 | 1.40  | SGAQATWTELPWPHEK\   | sp P02790 | 1.67E-06 | 4467.2   | 5352.0  | 4915.8   | 5734.5   | 6207.3   | 5300.7   | 13741.1  | 12624.9  | 14622.4  |
| 5574  | 5 | 995.297  | 4971.447 | 11.07 | DGWHWSPIAHQWPQGP    | sp P02790 | 1.13E-05 | 20498.8  | 19153.7 | 23952.8  | 17453.2  | 14652.3  | 17718.7  | 37321.7  | 41189.9  | 39090.0  |
| 6144  | 4 | 866.652  | 3462.579 | 5.56  | GECQAEGVLFFQGDREV   | sp P02790 | 3.53E-05 | 6717.9   | 4017.2  | 5956.2   | 6391.6   | 5497.5   | 6307.6   | 12188.3  | 14140.9  | 12362.6  |
| 9792  | 4 | 795.367  | 3177.438 | 12.78 | GECQAEGVLFFQGDREV   | sp P02790 | 3.26E-08 | 3857.5   | 3508.2  | 3743.9   | 9382.7   | 8878.7   | 10345.7  | 1803.6   | 1838.5   | 1505.5   |
| 9805  | 3 | 481.597  | 1441.769 | 7.17  | QGHNSVFLIKGDK       | sp P02790 | 1.69E-05 | 543.2    | 709.3   | 563.7    | 728.6    | 1147.7   | 807.4    | 2418.9   | 2788.4   | 2422.4   |
| 16838 | 5 | 1219.812 | 6094.023 | 13.54 | DGWHWSPIAHQWPQGP    | sp P02790 | 4.31E-06 | 6963.0   | 6259.7  | 8084.1   | 6742.5   | 6770.7   | 6134.0   | 17897.6  | 15030.5  | 15987.0  |
| 6116  | 3 | 665.953  | 1994.836 | 10.36 | WTPYQGCEALCCPEPK    | sp P04003 | 0.000102 | 2897.5   | 2765.5  | 3048.0   | 3960.0   | 2910.6   | 3611.3   | 7057.8   | 7192.3   | 9127.7   |
| 755   | 2 | 336.193  | 670.371  | 2.17  | TYLTK               | sp P04004 | 0.000128 | 11665.3  | 12824.8 | 11599.6  | 9986.6   | 11205.1  | 10394.8  | 11317.9  | 11115.7  | 11805.3  |
| 858   | 3 | 399.858  | 1196.552 | 8.52  | CTEGFNVDKK          | sp P04004 | 0.0303   | 15682.6  | 13337.6 | 16117.5  | 13951.6  | 13256.4  | 15283.4  | 16957.9  | 17799.5  | 16204.4  |
| 1093  | 4 | 871.344  | 3481.346 | 16.04 | CQCDELCSYQSCCTDY    | sp P04004 | 0.00555  | 102588.0 | 89437.7 | 90698.6  | 74960.2  | 77677.7  | 76901.8  | 82716.5  | 81310.1  | 76153.3  |
| 1121  | 2 | 590.769  | 1179.524 | 12.87 | CTEGFNVDKK          | sp P04004 | 0.011056 | 10869.7  | 13472.3 | 12605.8  | 14699.8  | 19130.3  | 15502.0  | 17382.6  | 18688.5  | 17570.4  |

|       |   |          |          |       |                        |           |          |         |         |         |         |         |         |         |         |         |
|-------|---|----------|----------|-------|------------------------|-----------|----------|---------|---------|---------|---------|---------|---------|---------|---------|---------|
| 1907  | 2 | 438.241  | 874.467  | 3.87  | QPQFISR                | sp P04004 | 0.018255 | 13522.7 | 14152.9 | 12774.1 | 11937.6 | 12652.7 | 12335.8 | 11419.1 | 11533.1 | 12197.0 |
| 2401  | 2 | 711.831  | 1421.648 | 15.06 | FEDGVLPDYPR            | sp P04004 | 3.61E-08 | 33420.1 | 36614.7 | 34601.4 | 40092.1 | 39845.1 | 38366.9 | 11977.6 | 12291.6 | 10567.3 |
| 2996  | 3 | 556.265  | 1665.772 | 8.17  | DWHGVPGQVDAAMAGR       | sp P04004 | 0.004255 | 5474.2  | 6456.4  | 6072.7  | 6922.8  | 9121.4  | 7908.6  | 8652.8  | 8324.5  | 11407.9 |
| 3068  | 2 | 506.825  | 1011.635 | 14.02 | TGISPLALIK             | sp P04114 | 0.010474 | 4407.5  | 4557.4  | 4819.5  | 3597.5  | 5363.7  | 3782.9  | 4925.2  | 4797.9  | 5044.0  |
| 3307  | 3 | 822.798  | 2465.372 | 19.38 | IADFELPTIIVPEQTIEIPSII | sp P04114 | 0.000827 | 12044.6 | 11948.4 | 10802.6 | 13782.2 | 15970.2 | 12943.4 | 9826.1  | 10279.7 | 10349.1 |
| 3623  | 3 | 514.296  | 1539.865 | 5.98  | LLSGGNTLHLVSTTK        | sp P04114 | 0.030521 | 4256.7  | 6815.3  | 4243.8  | 4314.9  | 6659.5  | 4609.0  | 3497.2  | 3529.3  | 4176.0  |
| 4639  | 2 | 371.733  | 741.451  | 1.36  | AAIQALR                | sp P04114 | 0.005115 | 1203.4  | 1422.7  | 1261.9  | 1273.5  | 1437.8  | 1263.0  | 1600.9  | 1682.4  | 1581.0  |
| 4751  | 2 | 431.246  | 860.477  | 5.69  | ITLPDFR                | sp P04114 | 1.59E-06 | 1590.4  | 2098.6  | 1894.9  | 2407.4  | 2326.4  | 2691.2  | 607.6   | 693.8   | 501.3   |
| 5119  | 2 | 569.781  | 1137.547 | 3.81  | QGFFPDSVNK             | sp P04114 | 0.000737 | 5441.2  | 8403.6  | 7136.0  | 8224.6  | 10537.3 | 8664.7  | 2829.8  | 2743.8  | 3129.9  |
| 8667  | 3 | 719.719  | 2156.135 | 14.46 | HSITNPLAVLCEFISQSIIK   | sp P04114 | 0.004527 | 4508.0  | 3873.7  | 5332.1  | 4411.0  | 3377.6  | 3888.6  | 5890.8  | 6194.0  | 5658.8  |
| 9593  | 3 | 1147.589 | 3439.746 | 17.90 | YSQPEDSLIPFFEITVPES    | sp P04114 | 0.000302 | 8111.6  | 7836.5  | 6685.7  | 12828.4 | 11587.6 | 11350.7 | 8740.6  | 7366.5  | 8238.4  |
| 14117 | 4 | 860.944  | 3439.748 | 15.18 | YSQPEDSLIPFFEITVPES    | sp P04114 | 0.002157 | 3127.8  | 2957.7  | 2941.9  | 4449.9  | 4286.9  | 4405.2  | 3479.4  | 3128.2  | 3612.7  |
| 16190 | 4 | 915.950  | 3659.772 | 14.44 | NKADYVETVLDSTCSSTV     | sp P04114 | 1.01E-06 | 3086.0  | 2997.2  | 3185.7  | 4651.7  | 3971.1  | 4041.6  | 862.1   | 892.7   | 572.0   |
| 21313 | 5 | 1026.753 | 5128.731 | 8.99  | LPEIAIPEFIPTLNLDNFQ    | sp P04114 | 0.000377 | 2658.5  | 3248.0  | 2838.3  | 3235.9  | 2565.6  | 2468.7  | 436.9   | 299.3   | 555.9   |
| 33042 | 4 | 743.177  | 2968.681 | 15.99 | VHANPLLIDVVTYLVALIPI   | sp P04114 | 1.18E-08 | 520.1   | 614.9   | 554.7   | 693.6   | 603.4   | 669.3   | 120.5   | 132.5   | 114.2   |
| 951   | 2 | 562.810  | 1123.605 | 7.64  | DGYLFQLLR              | sp P04196 | 0.042669 | 17926.8 | 22435.1 | 18742.1 | 18159.3 | 15298.1 | 18671.0 | 25070.6 | 17760.7 | 14986.8 |
| 1337  | 3 | 507.561  | 1519.661 | 5.89  | YKEENDDFASFR           | sp P04196 | 6.87E-08 | 15646.5 | 16265.6 | 15370.7 | 19824.9 | 19793.8 | 20178.9 | 11881.5 | 11449.3 | 12826.3 |
| 1488  | 3 | 608.970  | 1823.887 | 15.67 | ADLFYDVEALDLESPIK      | sp P04196 | 0.000572 | 20927.9 | 19056.9 | 20657.9 | 24073.1 | 21052.8 | 24501.6 | 22209.6 | 24345.7 | 22356.4 |
| 1508  | 3 | 314.863  | 941.568  | 3.27  | ALDLINKR               | sp P04196 | 0.002465 | 5491.7  | 7706.3  | 5416.1  | 5180.8  | 7709.8  | 5312.2  | 4788.9  | 4380.9  | 4532.5  |
| 1548  | 2 | 411.728  | 821.441  | 6.61  | QIGSVYR                | sp P04196 | 0.001268 | 5704.1  | 6256.3  | 5959.5  | 6649.5  | 6154.8  | 6200.7  | 7489.6  | 6707.5  | 6077.6  |
| 1573  | 3 | 429.568  | 1285.683 | 5.60  | RPSEIVIGQCK            | sp P04196 | 0.001974 | 9325.9  | 7792.3  | 9509.8  | 10956.0 | 10206.4 | 10897.0 | 12117.5 | 10663.0 | 10071.2 |
| 1661  | 2 | 745.850  | 1489.686 | 16.06 | GGEGTGYFVDFSVR         | sp P04196 | 0.000284 | 22585.1 | 18506.9 | 21269.7 | 22855.5 | 20390.4 | 21432.1 | 24497.6 | 23659.5 | 22454.0 |
| 1770  | 3 | 378.516  | 1132.526 | 1.40  | HPNVFGFCR              | sp P04196 | 0.00021  | 5897.0  | 6084.8  | 5606.5  | 6415.7  | 7074.7  | 5888.5  | 8851.5  | 7588.0  | 9908.8  |
| 2423  | 2 | 912.950  | 1823.886 | 17.90 | ADLFYDVEALDLESPIK      | sp P04196 | 0.003746 | 19249.9 | 18383.7 | 22659.8 | 26195.7 | 22540.1 | 28490.9 | 22320.5 | 25099.8 | 21717.0 |
| 2613  | 2 | 841.900  | 1681.786 | 17.06 | DSPVLIDFFEDTER         | sp P04196 | 0.00065  | 14612.9 | 15650.1 | 21625.2 | 22762.7 | 18876.9 | 25326.0 | 12014.5 | 11120.2 | 11241.7 |
| 3979  | 3 | 561.603  | 1681.787 | 9.95  | DSPVLIDFFEDTER         | sp P04196 | 0.000864 | 5098.3  | 5354.6  | 6903.3  | 8227.4  | 5930.4  | 8822.9  | 4332.4  | 3698.9  | 3762.8  |
| 4115  | 4 | 473.472  | 1889.858 | 6.78  | YKEENDDFASFRVDR        | sp P04196 | 2.09E-06 | 2060.0  | 2630.0  | 2924.5  | 1704.2  | 2247.3  | 1824.8  | 10417.7 | 9334.1  | 10415.1 |
| 6544  | 3 | 667.991  | 2000.953 | 10.50 | DSPVLIDFFEDTERYR       | sp P04196 | 0.00079  | 3057.5  | 2825.5  | 3287.0  | 3049.9  | 2280.9  | 3103.0  | 5068.8  | 4703.8  | 4659.4  |
| 1079  | 2 | 632.831  | 1263.648 | 16.06 | SGLSTGWTQLSK           | sp P04217 | 0.007366 | 27363.4 | 21082.0 | 23785.2 | 17796.2 | 21396.9 | 16724.6 | 22073.0 | 21594.5 | 25377.6 |
| 1223  | 4 | 537.768  | 2147.042 | 12.80 | IFFHLNAVALGDGGHYTC     | sp P04217 | 0.04644  | 23843.4 | 28807.2 | 21503.8 | 14750.9 | 21238.6 | 14461.5 | 17100.2 | 17035.3 | 14915.0 |
| 1674  | 2 | 403.251  | 804.488  | 3.95  | GVTFLLR                | sp P04217 | 0.011604 | 4686.8  | 5861.9  | 4825.3  | 4145.2  | 4081.7  | 3867.5  | 5436.7  | 5151.4  | 7073.1  |
| 1839  | 3 | 626.006  | 1874.996 | 17.11 | VTLCVAPLSGVDFQLR       | sp P04217 | 5.40E-05 | 18641.4 | 17355.2 | 16952.2 | 13041.6 | 11407.0 | 11777.1 | 12430.7 | 11344.8 | 11287.9 |
| 1903  | 2 | 363.730  | 725.445  | 2.22  | ELLVPR                 | sp P04217 | 0.020106 | 4402.4  | 4962.3  | 4412.8  | 2753.2  | 4468.6  | 3095.5  | 4422.3  | 4228.1  | 4072.8  |
| 2105  | 3 | 824.405  | 2470.194 | 12.43 | SWVPHTFESESDPVELL      | sp P04217 | 0.00559  | 26632.6 | 18922.6 | 27868.7 | 20915.5 | 23803.4 | 20572.2 | 17430.2 | 16149.8 | 18622.2 |

|       |   |          |          |       |                      |           |          |         |         |         |         |         |         |         |         |         |
|-------|---|----------|----------|-------|----------------------|-----------|----------|---------|---------|---------|---------|---------|---------|---------|---------|---------|
| 5175  | 2 | 1236.104 | 2470.193 | 8.90  | SWVPHTFESELSDPVELL   | sp P04217 | 0.020631 | 14868.7 | 11648.2 | 16520.2 | 12225.9 | 15741.7 | 11767.9 | 9554.3  | 8761.8  | 12161.7 |
| 8821  | 2 | 814.905  | 1627.795 | 8.61  | CEGPIPDVTFELLR       | sp P04217 | 0.002514 | 3254.4  | 2686.6  | 3585.2  | 3058.9  | 3047.9  | 3301.6  | 1708.6  | 2172.8  | 1542.3  |
| 13674 | 2 | 1076.088 | 2150.161 | 16.95 | SLPAPWLSMAPVSWITP    | sp P04217 | 0.003245 | 2511.6  | 2166.5  | 2975.8  | 3283.1  | 2601.1  | 3101.1  | 2249.6  | 2836.7  | 2639.0  |
| 297   | 2 | 455.736  | 909.457  | 6.33  | TLYSSSPR             | sp P05155 | 5.73E-05 | 43870.1 | 38363.1 | 40837.1 | 47682.1 | 51528.6 | 43038.4 | 68065.0 | 64891.0 | 70019.0 |
| 377   | 2 | 558.799  | 1115.584 | 13.15 | LLDSLPSDTR           | sp P05155 | 0.02121  | 37880.0 | 46982.4 | 47016.8 | 51334.3 | 72082.2 | 49107.2 | 40024.7 | 33493.4 | 43120.5 |
| 474   | 2 | 593.354  | 1184.694 | 10.79 | FQPTLLTLPR           | sp P05155 | 0.000506 | 57333.8 | 56354.2 | 57634.9 | 75442.1 | 66785.0 | 67732.4 | 47981.3 | 52927.2 | 44140.9 |
| 571   | 3 | 609.665  | 1825.972 | 16.90 | GVTSVSQIFHSPDLAIR    | sp P05155 | 7.47E-05 | 51097.9 | 59454.7 | 52635.3 | 69494.1 | 96969.5 | 67915.1 | 32696.3 | 26338.1 | 24007.5 |
| 640   | 3 | 406.870  | 1217.589 | 7.54  | DFTCVHQALK           | sp P05155 | 8.96E-08 | 23218.6 | 23119.2 | 21970.3 | 25324.7 | 26849.7 | 26344.1 | 14283.8 | 13918.2 | 14832.8 |
| 823   | 2 | 659.412  | 1316.810 | 15.06 | LVLNIAIYLSAK         | sp P05155 | 0.001438 | 33943.1 | 29421.0 | 33505.8 | 44408.3 | 32914.6 | 45196.5 | 28726.2 | 26521.2 | 24208.5 |
| 902   | 2 | 325.169  | 648.324  | 2.00  | VYDPR                | sp P05155 | 0.03362  | 9141.5  | 7834.1  | 9412.7  | 10077.3 | 8200.2  | 10312.4 | 10848.5 | 11253.3 | 12356.1 |
| 904   | 4 | 616.820  | 2463.251 | 12.54 | TNLESILSYPKDFTCVHQ   | sp P05155 | 8.14E-06 | 23911.3 | 30054.9 | 28308.9 | 21366.2 | 17611.8 | 21758.6 | 64912.8 | 82133.0 | 65492.2 |
| 3009  | 3 | 395.905  | 1184.694 | 1.82  | FQPTLLTLPR           | sp P05155 | 0.002516 | 4054.2  | 3568.2  | 4069.4  | 5103.8  | 4232.5  | 4574.3  | 3391.6  | 3612.6  | 3596.1  |
| 4515  | 3 | 872.473  | 2614.398 | 18.90 | TLLVFEVQQPFLFVLWDC   | sp P05155 | 2.76E-09 | 12328.1 | 10286.0 | 11484.4 | 18186.0 | 17334.2 | 16000.5 | 2484.2  | 2407.7  | 2239.0  |
| 6933  | 3 | 1022.879 | 3065.615 | 12.74 | KVETNMAFSPFSIASLLT   | sp P05155 | 1.55E-05 | 6851.0  | 6441.8  | 7141.9  | 13827.4 | 12705.0 | 12541.8 | 11158.9 | 12519.6 | 9224.9  |
| 12137 | 4 | 755.410  | 3017.613 | 8.14  | KVETNMAFSPFSIASLLT   | sp P05155 | 0.004815 | 3639.5  | 2819.7  | 3433.2  | 4369.3  | 4151.7  | 3984.7  | 3229.2  | 3027.5  | 2354.2  |
| 13249 | 4 | 654.607  | 2614.399 | 8.20  | TLLVFEVQQPFLFVLWDC   | sp P05155 | 6.54E-07 | 1369.6  | 1447.4  | 1325.0  | 2443.7  | 2140.3  | 2072.1  | 204.5   | 213.4   | 351.6   |
| 15562 | 4 | 767.411  | 3065.616 | 16.90 | KVETNMAFSPFSIASLLT   | sp P05155 | 2.10E-06 | 1451.7  | 1506.4  | 1503.1  | 2919.4  | 2555.0  | 2682.4  | 2445.7  | 2751.2  | 2256.4  |
| 16584 | 3 | 805.801  | 2414.382 | 15.91 | LLDSLPSDTRLVLLNIAIYL | sp P05155 | 5.96E-05 | 703.4   | 644.0   | 993.3   | 1152.8  | 956.7   | 896.2   | 3176.2  | 3325.8  | 2863.0  |
| 4657  | 2 | 560.825  | 1119.635 | 7.49  | QFPILLDFK            | sp P05546 | 6.12E-06 | 3501.7  | 3199.0  | 3712.9  | 3742.1  | 3315.8  | 3404.3  | 2028.7  | 2136.3  | 1969.3  |
| 5851  | 3 | 761.060  | 2280.158 | 12.90 | AILQSGSFNAPWAVTSLY   | sp P06276 | 0.000979 | 6869.6  | 6902.8  | 7833.2  | 7231.6  | 7460.1  | 7217.6  | 4975.5  | 4701.5  | 5681.3  |
| 4020  | 3 | 677.321  | 2028.942 | 14.64 | DSGVPDRFSGSGSGTDF    | sp P06310 | 0.000624 | 6099.5  | 6759.4  | 6317.2  | 4554.6  | 5377.8  | 5690.6  | 8928.4  | 9101.1  | 11986.4 |
| 10267 | 2 | 373.178  | 744.341  | 4.47  | DSGVPDR              | sp P06310 | 1.53E-05 | 2646.6  | 2339.0  | 2931.8  | 2842.0  | 2196.9  | 2608.5  | 1224.6  | 1257.9  | 1128.1  |
| 1942  | 2 | 561.820  | 1121.625 | 11.17 | LLIYWASTR            | sp P06312 | 0.009812 | 10539.9 | 12540.5 | 11302.1 | 8918.4  | 11849.2 | 9631.1  | 9893.8  | 10385.5 | 9751.5  |
| 2711  | 2 | 380.186  | 758.357  | 1.45  | ESGVPDR              | sp P06312 | 0.000174 | 4565.0  | 3851.5  | 4428.7  | 4747.4  | 4001.2  | 4938.7  | 1480.3  | 1749.0  | 1422.6  |
| 20795 | 2 | 364.701  | 727.388  | 2.07  | VNVGDPK              | sp P06681 | 0.000683 | 696.7   | 584.1   | 705.9   | 657.0   | 516.6   | 700.9   | 1064.6  | 1040.6  | 1061.7  |
| 27809 | 2 | 674.868  | 1347.722 | 5.54  | QHLGDVNLNPL          | sp P06681 | 0.012116 | 252.5   | 192.7   | 317.6   | 291.8   | 222.3   | 282.5   | 409.5   | 440.3   | 391.7   |
| 2916  | 2 | 882.963  | 1763.912 | 16.90 | WSAGLTSSQVDLYIPK     | sp P08185 | 0.038504 | 18048.5 | 12055.7 | 17571.4 | 16550.5 | 11402.2 | 16503.8 | 10223.2 | 10453.5 | 8470.3  |
| 10265 | 4 | 701.872  | 2803.460 | 18.78 | KNIFISPVISMALAMLSL   | sp P08185 | 0.001137 | 3735.5  | 3668.6  | 4197.3  | 3882.8  | 3103.3  | 3612.2  | 2815.0  | 2688.4  | 2694.1  |
| 11761 | 3 | 892.795  | 2675.363 | 15.17 | NIFISPVISMALAMLSLG   | sp P08185 | 2.08E-05 | 3280.9  | 2881.7  | 3007.7  | 4568.5  | 4381.0  | 4349.8  | 2555.9  | 2210.6  | 2158.7  |
| 21376 | 3 | 910.803  | 2729.387 | 16.17 | FNQPFIIIFDHTWSSLF    | sp P08185 | 1.89E-05 | 1065.1  | 1290.1  | 1395.2  | 877.0   | 686.9   | 858.8   | 2054.9  | 2198.2  | 2052.8  |
| 3742  | 3 | 509.927  | 1526.758 | 9.81  | SIDVACHPGYALPK       | sp P08603 | 6.08E-05 | 3112.1  | 3503.1  | 3093.2  | 3311.7  | 3817.4  | 3276.6  | 4847.3  | 4869.4  | 5229.3  |
| 2305  | 2 | 656.847  | 1311.680 | 10.99 | LGNQEPGGQTALK        | sp P08697 | 1.94E-06 | 16033.2 | 15229.5 | 15084.0 | 12081.8 | 12710.2 | 11146.0 | 7893.4  | 8117.8  | 7466.1  |
| 3451  | 3 | 710.380  | 2128.119 | 13.90 | WFLLEQPEIQVAHFPPK    | sp P08697 | 9.73E-06 | 19759.3 | 15235.9 | 18359.1 | 16242.3 | 11132.7 | 14741.0 | 5068.4  | 4134.9  | 4458.5  |
| 5901  | 5 | 884.657  | 4418.250 | 6.35  | GFPIKEDFLEQSEQLFGA   | sp P08697 | 0.000371 | 12180.4 | 11861.5 | 11657.9 | 9655.9  | 13137.3 | 8713.9  | 5844.3  | 4769.6  | 4973.4  |



|       |   |          |          |       |                    |           |          |          |         |          |          |         |          |         |          |          |
|-------|---|----------|----------|-------|--------------------|-----------|----------|----------|---------|----------|----------|---------|----------|---------|----------|----------|
| 17187 | 3 | 908.479  | 2722.415 | 12.22 | HQMDLVATLSQLGLQELF | sp P08697 | 0.001135 | 1286.7   | 1496.4  | 1679.5   | 1994.5   | 2099.2  | 2025.4   | 734.3   | 1178.0   | 826.5    |
| 1358  | 2 | 684.365  | 1366.716 | 15.06 | DSSTWLTAFVLK       | sp P0C0L4 | 0.000142 | 12192.7  | 16140.6 | 12276.1  | 35920.3  | 26061.5 | 33538.5  | 21376.7 | 20951.5  | 18393.5  |
| 2633  | 3 | 1044.830 | 3131.467 | 19.99 | LQETSNWLLSQQADGS   | sp P0C0L4 | 4.69E-05 | 21880.3  | 20300.8 | 24249.1  | 41963.7  | 33154.9 | 45211.1  | 17353.3 | 18027.3  | 17526.8  |
| 4375  | 3 | 543.320  | 1626.938 | 12.10 | PVAFSVVPTAAAASLK   | sp P0C0L4 | 1.31E-06 | 3575.8   | 2961.6  | 3088.5   | 7405.8   | 5044.1  | 8621.7   | 698.4   | 890.0    | 796.6    |
| 5569  | 3 | 456.579  | 1366.716 | 7.43  | DSSTWLTAFVLK       | sp P0C0L4 | 6.14E-05 | 1289.0   | 1496.9  | 1429.6   | 3614.2   | 2564.0  | 2941.3   | 1976.4  | 2070.7   | 1987.4   |
| 6055  | 2 | 814.475  | 1626.936 | 11.89 | PVAFSVVPTAAAASLK   | sp P0C0L4 | 1.17E-05 | 4396.3   | 3551.0  | 3561.9   | 8945.6   | 5823.5  | 10232.7  | 832.2   | 1120.5   | 590.0    |
| 1959  | 4 | 775.140  | 3096.531 | 16.99 | LQETSNWLLSQQADGS   | sp P0C0L5 | 0.002937 | 19850.8  | 14884.8 | 18956.3  | 32705.5  | 26180.6 | 28368.5  | 16730.9 | 19059.4  | 19061.3  |
| 2535  | 3 | 1033.184 | 3096.530 | 21.78 | LQETSNWLLSQQADGS   | sp P0C0L5 | 0.002842 | 22348.2  | 15961.2 | 20856.9  | 36583.5  | 30389.5 | 33156.9  | 16178.7 | 20707.1  | 19962.6  |
| 3021  | 2 | 655.363  | 1308.711 | 14.06 | GSSTWLTAFVLK       | sp P0C0L5 | 0.000393 | 6582.6   | 5779.8  | 6652.8   | 4719.9   | 4835.7  | 5809.5   | 8734.8  | 7476.8   | 7410.8   |
| 4416  | 5 | 924.874  | 4619.332 | 11.17 | VLSLAQEQVGGSPKQLQI | sp P0C0L5 | 1.26E-06 | 10306.4  | 9173.8  | 8700.6   | 11795.2  | 10624.4 | 12190.5  | 32476.3 | 31440.6  | 27397.5  |
| 889   | 3 | 772.065  | 2313.174 | 15.17 | VTTVASHTSDSDVPSGV1 | sp P10909 | 0.014798 | 48691.8  | 45741.0 | 51593.3  | 46279.5  | 65279.2 | 49828.3  | 68923.2 | 62627.2  | 70661.8  |
| 1499  | 2 | 644.824  | 1287.633 | 13.83 | ELDESLQVAER        | sp P10909 | 0.001393 | 13714.2  | 18813.6 | 16838.4  | 15735.9  | 13557.1 | 14527.5  | 21103.0 | 20398.2  | 23048.5  |
| 1937  | 2 | 697.353  | 1392.691 | 15.06 | ASSIIDELFQDR       | sp P10909 | 0.000601 | 17012.7  | 15695.9 | 18469.4  | 16144.5  | 13828.0 | 16425.1  | 10630.6 | 11544.1  | 10580.2  |
| 2168  | 2 | 356.177  | 710.340  | 3.63  | SYQWK              | sp P10909 | 7.46E-05 | 4257.1   | 4208.9  | 4051.7   | 3990.9   | 4113.3  | 4010.2   | 4671.4  | 5065.8   | 4862.9   |
| 3272  | 2 | 536.786  | 1071.557 | 7.28  | EIQNAVNGVK         | sp P10909 | 0.00236  | 4465.6   | 3912.9  | 4289.0   | 4316.9   | 4303.9  | 4538.3   | 3319.8  | 3635.0   | 3503.9   |
| 4999  | 4 | 500.748  | 1998.964 | 4.44  | EPQDTHYHLPFSLPHR   | sp P10909 | 0.039649 | 5059.7   | 5849.8  | 5009.2   | 4330.2   | 4735.5  | 4374.8   | 4824.7  | 4468.4   | 3343.0   |
| 5651  | 3 | 408.176  | 1221.506 | 3.40  | EGDDDRTVCR         | sp P10909 | 0.023444 | 3764.3   | 3195.0  | 3913.6   | 3993.8   | 3098.3  | 3348.9   | 4690.3  | 4623.6   | 5144.0   |
| 8809  | 3 | 649.000  | 1943.979 | 9.37  | ASSIIDELFQDRFFTR   | sp P10909 | 1.20E-06 | 1795.5   | 1603.6  | 1596.2   | 1194.2   | 958.2   | 1039.3   | 3059.2  | 4125.7   | 3480.5   |
| 186   | 4 | 309.432  | 1233.700 | 4.66  | EHVAHLLFLR         | sp P19652 | 0.03369  | 45393.2  | 57683.5 | 50966.9  | 49024.7  | 66687.4 | 46709.1  | 32044.6 | 36115.3  | 45747.2  |
| 368   | 3 | 408.869  | 1223.584 | 7.88  | SDVMYTDWKK         | sp P19652 | 5.35E-06 | 46927.0  | 47841.3 | 44937.9  | 46949.0  | 42637.3 | 45140.7  | 74643.2 | 71748.5  | 67236.5  |
| 416   | 2 | 548.752  | 1095.489 | 6.07  | SDVMYTDWK          | sp P19652 | 0.002664 | 62464.1  | 61066.6 | 64538.5  | 58687.6  | 67299.0 | 56275.5  | 54549.0 | 55572.4  | 55517.4  |
| 534   | 3 | 704.997  | 2111.970 | 16.11 | EQLGEFYALDCLCIPR   | sp P19652 | 4.69E-05 | 119838.2 | 84541.4 | 106607.6 | 126271.6 | 88544.7 | 107859.6 | 36772.1 | 40900.7  | 37663.7  |
| 550   | 5 | 360.197  | 1795.951 | 4.10  | YEGGREHVAHLLFLR    | sp P19652 | 6.06E-05 | 16464.8  | 21929.7 | 18226.8  | 15541.6  | 24585.5 | 18037.8  | 53486.0 | 49198.0  | 62575.1  |
| 592   | 4 | 449.995  | 1795.951 | 6.33  | YEGGREHVAHLLFLR    | sp P19652 | 0.005722 | 20899.8  | 35258.5 | 22467.6  | 17325.5  | 37763.3 | 21787.6  | 62878.5 | 56153.1  | 88465.1  |
| 973   | 3 | 366.170  | 1095.489 | 2.12  | SDVMYTDWK          | sp P19652 | 0.004652 | 14775.5  | 13952.1 | 15837.3  | 14063.3  | 15828.2 | 13303.6  | 13392.8 | 13427.9  | 12968.1  |
| 1081  | 3 | 424.870  | 1271.588 | 9.32  | SDVMYTDWKK         | sp P19652 | 1.07E-05 | 9056.2   | 9124.1  | 9157.1   | 11855.2  | 13904.2 | 11438.1  | 19411.9 | 18454.5  | 20793.7  |
| 1648  | 5 | 622.503  | 3107.478 | 7.16  | TLMFGSYLDDEKNWGLS  | sp P19652 | 2.47E-09 | 32285.9  | 34052.1 | 32080.5  | 37534.1  | 34738.7 | 35236.9  | 9583.8  | 10344.3  | 10617.7  |
| 1865  | 2 | 1056.991 | 2111.967 | 16.95 | EQLGEFYALDCLCIPR   | sp P19652 | 7.44E-05 | 59970.5  | 38662.2 | 48714.5  | 67165.8  | 43115.7 | 55758.1  | 15742.6 | 18240.8  | 16211.5  |
| 2348  | 5 | 1050.895 | 5249.439 | 5.99  | TLMFGSYLDDEKNWGLS  | sp P19652 | 1.41E-05 | 46527.7  | 42303.6 | 46369.8  | 65708.8  | 61604.5 | 60517.9  | 92650.0 | 125090.8 | 103071.5 |
| 2368  | 4 | 789.879  | 3155.486 | 6.78  | TLMFGSYLDDEKNWGLS  | sp P19652 | 6.37E-06 | 24838.6  | 20995.6 | 25258.2  | 40026.1  | 33569.1 | 38953.6  | 12288.7 | 12748.2  | 9598.8   |
| 651   | 3 | 494.592  | 1480.755 | 10.86 | IYGNQDTSSQLKK      | sp P19823 | 0.000507 | 22614.7  | 22097.3 | 19412.8  | 24780.3  | 22369.2 | 26236.3  | 38372.8 | 37579.7  | 30885.6  |
| 655   | 2 | 791.932  | 1581.849 | 17.90 | IQPSGGTNINEALLR    | sp P19823 | 0.014859 | 55030.4  | 66928.4 | 58370.1  | 59862.7  | 74717.9 | 61624.1  | 72390.2 | 62013.8  | 71906.1  |
| 662   | 2 | 669.365  | 1336.716 | 11.05 | FYNQVSTPLLR        | sp P19823 | 0.000737 | 30448.7  | 28962.7 | 34464.9  | 35743.3  | 28205.4 | 37379.6  | 52027.7 | 53201.6  | 49086.1  |
| 938   | 4 | 921.695  | 3682.749 | 16.09 | NVQFNYPHTSVTDVTQNI | sp P19823 | 0.000188 | 90952.6  | 80375.6 | 93459.8  | 103755.2 | 91373.1 | 103612.1 | 56780.6 | 60940.9  | 57770.4  |

|       |   |          |          |       |                     |           |          |         |         |         |         |         |         |         |          |         |
|-------|---|----------|----------|-------|---------------------|-----------|----------|---------|---------|---------|---------|---------|---------|---------|----------|---------|
| 1198  | 2 | 396.722  | 791.430  | 2.24  | ALYAQAR             | sp P19823 | 0.025929 | 7100.0  | 4964.5  | 6589.2  | 6934.6  | 7302.3  | 7422.6  | 8714.1  | 8831.8   | 7860.7  |
| 1200  | 3 | 473.915  | 1418.722 | 7.74  | VQFELHYQEVK         | sp P19823 | 0.00118  | 11927.7 | 16760.4 | 15557.0 | 18036.2 | 20473.7 | 16901.9 | 11872.4 | 10903.9  | 13513.1 |
| 1255  | 2 | 423.746  | 845.478  | 5.87  | IYLQPGR             | sp P19823 | 0.001836 | 9474.4  | 10787.0 | 9478.5  | 11167.9 | 13515.7 | 10344.2 | 8787.9  | 8877.0   | 9095.3  |
| 1260  | 4 | 367.957  | 1467.797 | 3.50  | AHVSFKPTVAQQR       | sp P19823 | 0.000128 | 10254.7 | 9898.7  | 9832.1  | 13299.1 | 11579.5 | 11545.6 | 15282.7 | 14598.6  | 14110.6 |
| 1373  | 3 | 611.354  | 1831.039 | 11.95 | KLWAYLTINQLLAER     | sp P19823 | 0.026986 | 23668.3 | 20858.4 | 21184.7 | 30832.3 | 27496.4 | 25559.5 | 25807.5 | 23948.6  | 23312.6 |
| 1440  | 2 | 415.243  | 828.471  | 8.97  | SLAPATAAK           | sp P19823 | 0.0036   | 7808.8  | 7166.6  | 8447.7  | 9912.3  | 9361.0  | 9256.4  | 8869.7  | 8457.5   | 8279.8  |
| 1534  | 3 | 597.325  | 1788.954 | 7.38  | HLEV DVWVIEPQGLR    | sp P19823 | 9.70E-05 | 18583.0 | 16622.4 | 19024.1 | 24663.1 | 21922.7 | 23633.5 | 19738.4 | 22395.7  | 19850.4 |
| 1715  | 2 | 514.294  | 1026.573 | 7.19  | TEVNVLPGAK          | sp P19823 | 0.000328 | 11736.6 | 12936.5 | 11872.4 | 12977.0 | 18183.4 | 15390.6 | 8399.3  | 8406.8   | 8957.3  |
| 2417  | 3 | 946.139  | 2835.396 | 20.17 | AGELEVFNGYFVHFFAPC  | sp P19823 | 0.00357  | 34006.2 | 36767.3 | 31767.7 | 49223.7 | 37122.7 | 44858.4 | 27180.8 | 29052.2  | 23854.9 |
| 2482  | 3 | 490.273  | 1467.797 | 9.91  | AHVSFKPTVAQQR       | sp P19823 | 0.000205 | 6906.2  | 7181.4  | 6988.8  | 8666.5  | 8792.3  | 8184.2  | 10906.1 | 9776.1   | 9158.7  |
| 2750  | 3 | 528.291  | 1581.851 | 10.66 | IQPSGGTNINEALLR     | sp P19823 | 0.002706 | 6372.1  | 6960.3  | 7175.6  | 6906.9  | 7599.0  | 7073.7  | 8914.2  | 8124.7   | 8479.6  |
| 4605  | 2 | 308.693  | 615.372  | 1.46  | TAGLVR              | sp P19823 | 0.034328 | 4369.0  | 3790.3  | 4534.6  | 5143.3  | 4041.2  | 4964.3  | 6166.5  | 6357.0   | 6352.7  |
| 7509  | 3 | 568.655  | 1702.944 | 9.72  | LWAYLTINQLLAER      | sp P19823 | 0.005256 | 2949.5  | 1835.8  | 2418.5  | 3328.8  | 2674.8  | 3397.5  | 2251.3  | 2261.5   | 2050.1  |
| 8629  | 4 | 709.856  | 2835.396 | 12.43 | AGELEVFNGYFVHFFAPC  | sp P19823 | 0.004303 | 4305.9  | 4478.0  | 4022.1  | 6454.3  | 4219.2  | 5499.6  | 2931.2  | 3416.8   | 3223.5  |
| 21826 | 4 | 1138.832 | 4551.301 | 11.15 | FDPAKLDQIESVITATSAN | sp P19823 | 0.000303 | 2042.2  | 1880.6  | 1904.2  | 3627.2  | 2609.4  | 3227.7  | 1506.7  | 1426.9   | 1407.6  |
| 23461 | 4 | 941.766  | 3763.036 | 16.58 | AIFILNEANNLGLDPNSV  | sp P19823 | 0.000128 | 4524.5  | 4429.6  | 4749.8  | 5916.8  | 5062.0  | 5681.2  | 3341.1  | 2709.8   | 2180.4  |
| 25831 | 5 | 911.267  | 4551.300 | 14.31 | FDPAKLDQIESVITATSAN | sp P19823 | 0.000168 | 993.5   | 960.5   | 856.3   | 1562.1  | 1136.7  | 1366.5  | 536.2   | 611.0    | 684.6   |
| 28928 | 3 | 1255.352 | 3763.033 | 15.30 | AIFILNEANNLGLDPNSV  | sp P19823 | 0.000105 | 4930.9  | 4940.3  | 4531.5  | 6375.0  | 5634.8  | 6481.4  | 3285.3  | 3000.0   | 2211.5  |
| 824   | 3 | 669.341  | 2005.001 | 6.88  | FAHYVVT SQVVNTANEAF | sp P19827 | 0.01996  | 49578.9 | 51129.9 | 43566.4 | 51137.6 | 72290.7 | 52335.2 | 45834.9 | 39653.8  | 55958.8 |
| 1004  | 2 | 580.815  | 1159.615 | 12.71 | EVAFDLEIPK          | sp P19827 | 0.030678 | 21815.0 | 19602.6 | 21965.5 | 21353.2 | 20044.6 | 23252.0 | 19160.9 | 15528.7  | 12442.3 |
| 1087  | 2 | 579.318  | 1156.622 | 16.06 | AAISGENAGLVR        | sp P19827 | 0.038338 | 18093.1 | 20709.5 | 18777.4 | 19881.3 | 21568.4 | 18230.7 | 18671.1 | 18077.8  | 20115.4 |
| 1132  | 2 | 735.865  | 1469.716 | 18.11 | QYYEGSEIVVAGR       | sp P19827 | 0.001122 | 29284.3 | 35609.9 | 31239.3 | 36768.6 | 38060.8 | 32086.3 | 46944.4 | 40488.4  | 53827.4 |
| 1250  | 2 | 545.302  | 1088.589 | 13.98 | LDAQASFLPK          | sp P19827 | 0.001588 | 26043.7 | 29848.1 | 25767.2 | 29336.3 | 32317.2 | 28183.5 | 20628.9 | 18146.3  | 22996.7 |
| 1397  | 2 | 420.217  | 838.419  | 5.47  | VTYDVSR             | sp P19827 | 3.30E-05 | 8513.9  | 10005.6 | 8647.1  | 10498.5 | 11232.7 | 11101.2 | 4893.7  | 5579.7   | 6193.9  |
| 1442  | 6 | 842.430  | 5048.539 | 13.06 | IYEDHDATQQLQGFYSQ   | sp P19827 | 0.003899 | 74132.8 | 61094.7 | 73361.2 | 87660.3 | 71244.8 | 77170.2 | 99795.4 | 100866.6 | 94052.6 |
| 2178  | 2 | 781.454  | 1560.894 | 17.06 | LWAYLTIQELLAK       | sp P19827 | 0.018584 | 19394.1 | 14946.2 | 17438.6 | 22141.7 | 18382.6 | 20147.3 | 16345.8 | 16388.0  | 11436.8 |
| 2188  | 2 | 839.427  | 1676.839 | 16.90 | GFSLDEATNLNGGLLR    | sp P19827 | 0.017484 | 20955.2 | 21392.1 | 18385.1 | 28031.6 | 22770.6 | 24899.0 | 20362.7 | 18351.4  | 19725.1 |
| 2286  | 3 | 429.246  | 1284.717 | 5.77  | KA AISGENAGLVR      | sp P19827 | 0.00091  | 6320.0  | 6348.7  | 5783.5  | 7420.9  | 7605.7  | 7182.9  | 7256.0  | 7481.2   | 7362.5  |
| 2573  | 3 | 542.636  | 1624.886 | 10.86 | VTFQLTYEEVLKR       | sp P19827 | 3.48E-07 | 10287.3 | 10741.2 | 9384.6  | 13450.8 | 14043.9 | 11207.7 | 4053.2  | 3914.7   | 3495.3  |
| 2627  | 3 | 521.306  | 1560.895 | 11.32 | LWAYLTIQELLAK       | sp P19827 | 0.011047 | 7909.6  | 5940.3  | 7256.6  | 9377.4  | 7648.7  | 8171.1  | 7554.0  | 7952.0   | 5930.1  |
| 3286  | 3 | 334.539  | 1000.594 | 4.15  | ELAAQTIKK           | sp P19827 | 0.021365 | 1830.1  | 1569.4  | 2038.3  | 2070.8  | 1862.4  | 2287.2  | 2884.6  | 3189.1   | 3885.0  |
| 3500  | 4 | 751.140  | 3000.530 | 16.65 | TAFISDFAVTADGNAFIGC | sp P19827 | 7.31E-06 | 11944.4 | 9792.1  | 10380.8 | 10946.9 | 9713.1  | 10002.4 | 23095.0 | 20992.5  | 19141.1 |
| 4839  | 5 | 663.934  | 3314.633 | 10.71 | KGHVLF RPTVSQQQSCPC | sp P19827 | 0.005237 | 8688.6  | 12977.2 | 9024.1  | 11401.7 | 15337.2 | 14127.7 | 8164.6  | 7237.2   | 7374.0  |
| 5320  | 3 | 328.535  | 982.583  | 5.41  | ELAAQTIKK           | sp P19827 | 0.035645 | 977.9   | 865.4   | 1063.4  | 1072.3  | 990.2   | 1222.8  | 1398.2  | 1584.1   | 1917.5  |

|       |   |          |          |       |                               |          |         |         |         |         |         |         |         |         |         |
|-------|---|----------|----------|-------|-------------------------------|----------|---------|---------|---------|---------|---------|---------|---------|---------|---------|
| 8744  | 4 | 1002.009 | 4004.008 | 13.77 | GIEILNQVESLPELSNH/ sp P19827  | 7.50E-05 | 11087.2 | 10130.5 | 11545.2 | 25819.6 | 21092.1 | 20625.5 | 11380.9 | 11165.3 | 8618.0  |
| 10014 | 3 | 719.696  | 2156.066 | 11.45 | ILGDMQPGDYFDLVLFGT sp P19827  | 0.00044  | 1383.4  | 1216.4  | 1408.0  | 2420.1  | 2672.9  | 3349.7  | 1793.7  | 1931.4  | 1516.7  |
| 10027 | 3 | 725.033  | 2172.079 | 19.11 | TAFISDFAVTADGNAFIGE sp P19827 | 4.78E-06 | 5470.1  | 4897.8  | 5249.3  | 7711.1  | 5767.7  | 6482.7  | 2393.7  | 2378.7  | 2364.8  |
| 18692 | 2 | 1079.039 | 2156.063 | 16.90 | ILGDMQPGDYFDLVLFGT sp P19827  | 0.000284 | 903.5   | 955.7   | 1055.4  | 1780.3  | 1978.0  | 2430.6  | 1025.8  | 1194.2  | 1229.8  |
| 2183  | 3 | 848.703  | 2543.087 | 17.38 | SQCTYSNPEGTVVLACD( sp P22792  | 0.000537 | 32188.3 | 34201.8 | 34240.6 | 26508.0 | 24408.7 | 25390.3 | 38310.0 | 30448.6 | 38237.6 |
| 2649  | 2 | 801.437  | 1600.860 | 16.90 | LSNNALSGLPQGVFGK sp P22792    | 0.014114 | 15828.8 | 14248.0 | 17055.8 | 15457.4 | 14250.1 | 14760.1 | 11987.0 | 13983.7 | 11108.7 |
| 2719  | 3 | 812.428  | 2434.262 | 15.90 | VVFLNTQLCQFRPDAFGC sp P22792  | 0.013707 | 25545.7 | 18675.1 | 20989.1 | 23626.0 | 15157.4 | 18704.6 | 12980.4 | 13796.2 | 13144.0 |
| 4557  | 4 | 762.182  | 3044.697 | 16.99 | TLNLAQNLLAQLPEELFHI sp P22792 | 0.004253 | 9363.4  | 9014.6  | 9099.7  | 11343.1 | 9519.9  | 8564.7  | 10744.2 | 9886.5  | 10633.8 |
| 4675  | 2 | 617.285  | 1232.556 | 11.01 | CLAYDFYPGK sp P25311          | 0.00593  | 3598.9  | 3951.2  | 3280.3  | 2168.1  | 2474.8  | 2299.3  | 3653.5  | 2682.1  | 3254.4  |
| 4746  | 3 | 801.743  | 2402.206 | 15.90 | HVEDVPAFQALGSLNDLC sp P25311  | 0.007464 | 10720.3 | 11551.3 | 11798.4 | 8926.0  | 6794.4  | 9219.0  | 10823.5 | 11049.5 | 12517.4 |
| 10383 | 3 | 800.759  | 2399.255 | 15.38 | ILLMDLNEEDPTVLELGIT sp P27169 | 1.01E-07 | 3055.2  | 3047.8  | 2839.8  | 3880.1  | 3632.8  | 3787.0  | 1680.8  | 1578.7  | 1571.6  |
| 6521  | 2 | 657.845  | 1313.676 | 4.12  | DFALQNPSAVPR sp P35858        | 0.004081 | 3404.3  | 3341.4  | 3360.8  | 2314.0  | 2514.9  | 2485.5  | 2870.9  | 2583.2  | 3425.8  |
| 7338  | 2 | 727.942  | 1453.869 | 9.17  | NLIAAVAPGAFLGLK sp P35858     | 4.44E-07 | 3054.8  | 3858.0  | 3269.6  | 3095.4  | 3031.6  | 2641.9  | 776.1   | 792.3   | 635.5   |
| 7382  | 4 | 334.447  | 1333.761 | 1.39  | LSHNAIASLRPR sp P35858        | 0.003474 | 1138.2  | 1126.4  | 1004.7  | 857.7   | 997.8   | 868.4   | 745.6   | 794.5   | 758.3   |
| 9511  | 2 | 835.979  | 1669.943 | 16.90 | VAGLLEDTFPGLLGLR sp P35858    | 6.98E-05 | 3139.4  | 3002.2  | 3260.3  | 2919.5  | 2210.3  | 3089.6  | 895.2   | 1074.8  | 844.4   |
| 13634 | 3 | 557.655  | 1669.943 | 12.16 | VAGLLEDTFPGLLGLR sp P35858    | 1.45E-05 | 1316.7  | 1111.7  | 1233.5  | 1036.4  | 812.8   | 955.2   | 319.9   | 397.6   | 271.6   |
| 29174 | 4 | 953.498  | 3809.965 | 19.09 | DNGLVGIEEQSLWGLAEI sp P35858  | 0.002982 | 995.3   | 917.9   | 1150.5  | 767.0   | 824.8   | 749.9   | 682.1   | 689.9   | 809.7   |
| 1550  | 2 | 527.799  | 1053.584 | 4.29  | LPNNVLQEK sp P43652           | 0.000363 | 21416.4 | 23601.2 | 21869.9 | 16390.4 | 23661.4 | 17087.8 | 10159.8 | 10601.2 | 12150.0 |
| 1682  | 3 | 530.948  | 1589.823 | 10.83 | ESLLNHFLYEVAR sp P43652       | 3.63E-07 | 18752.1 | 16481.3 | 15209.9 | 12944.2 | 11384.4 | 11593.9 | 6080.9  | 5986.0  | 5937.9  |
| 1719  | 3 | 642.614  | 1924.821 | 15.64 | SCCEEQNKVNCLQTR sp P43652     | 0.00143  | 23184.6 | 23818.1 | 24711.6 | 16787.2 | 15471.8 | 17385.4 | 18274.1 | 20172.2 | 17202.7 |
| 1737  | 4 | 673.348  | 2689.364 | 7.56  | LKHELTDEELQSLFTNFAI sp P43652 | 0.002155 | 25778.2 | 27719.3 | 31812.4 | 22668.1 | 30450.5 | 22518.1 | 16925.3 | 17010.0 | 17507.3 |
| 1950  | 2 | 811.855  | 1621.695 | 17.06 | AESPEVCFNeesPK sp P43652      | 3.05E-08 | 27947.9 | 26728.5 | 28058.3 | 22231.2 | 25558.5 | 26302.4 | 8733.9  | 8699.2  | 8834.7  |
| 1957  | 3 | 438.870  | 1313.587 | 9.73  | TINPAVDHCKK sp P43652         | 0.005097 | 9561.5  | 8940.8  | 10268.6 | 8003.6  | 6868.9  | 7166.4  | 7098.1  | 7476.0  | 5878.1  |
| 2100  | 2 | 692.794  | 1383.574 | 12.15 | FTDSENVQER sp P43652          | 1.35E-07 | 17766.8 | 18675.6 | 18916.8 | 16331.0 | 12601.4 | 13985.0 | 4152.5  | 3593.4  | 3478.4  |
| 2373  | 4 | 411.959  | 1643.807 | 2.10  | GQCIINSNKDDRPK sp P43652      | 0.00529  | 7763.0  | 8002.8  | 7896.9  | 5782.0  | 4790.8  | 6520.1  | 5350.4  | 6152.2  | 5744.3  |
| 2639  | 4 | 622.097  | 2484.358 | 12.07 | RNPFVFAPTLLTVAVHFEI sp P43652 | 0.005107 | 19971.3 | 15635.2 | 17906.1 | 16181.6 | 13412.8 | 15292.0 | 12353.7 | 12185.1 | 11734.1 |
| 3097  | 2 | 516.809  | 1031.603 | 1.33  | AIPVTQYLK sp P43652           | 2.83E-05 | 9561.2  | 12002.3 | 9502.2  | 8392.1  | 10184.1 | 8499.5  | 3095.4  | 3998.6  | 4092.7  |
| 4074  | 3 | 366.859  | 1097.556 | 4.06  | ICAMEGLPQK sp P43652          | 7.41E-07 | 3213.4  | 2570.9  | 3179.8  | 2502.6  | 2637.2  | 2455.1  | 957.4   | 761.6   | 850.5   |
| 4192  | 3 | 831.362  | 2491.063 | 18.64 | FTDSENVQERDADPDTI sp P43652   | 2.90E-06 | 6940.1  | 8333.5  | 8017.1  | 3661.7  | 4249.7  | 3404.2  | 13103.7 | 11820.5 | 15776.5 |
| 4221  | 2 | 944.474  | 1886.933 | 15.90 | SDVGFLPPFPPTLDPEEK sp P43652  | 0.000143 | 18805.8 | 17862.4 | 15709.0 | 13887.7 | 11763.5 | 13616.5 | 8969.3  | 9778.1  | 8584.1  |
| 4689  | 2 | 514.218  | 1026.421 | 7.92  | CQAYESNR sp P43652            | 3.28E-06 | 9013.8  | 7830.8  | 9732.8  | 6661.7  | 5851.8  | 6548.0  | 3521.5  | 3509.1  | 2950.9  |
| 4920  | 2 | 415.706  | 829.398  | 4.72  | AFSSYQK sp P43652             | 4.78E-08 | 2266.0  | 1961.2  | 2464.9  | 2187.6  | 1778.0  | 2111.9  | 415.3   | 342.3   | 374.8   |
| 6666  | 3 | 629.985  | 1886.935 | 14.67 | SDVGFLPPFPPTLDPEEK sp P43652  | 7.53E-05 | 5359.5  | 4984.9  | 4897.2  | 4438.0  | 3408.2  | 3962.7  | 2560.5  | 2912.5  | 2695.7  |
| 6953  | 3 | 1006.117 | 3015.328 | 22.04 | ELISLVEDVSSNYDGCCE sp P43652  | 1.67E-09 | 15357.4 | 16891.0 | 18425.9 | 16077.6 | 17136.6 | 14970.7 | 1757.4  | 1617.8  | 1990.5  |

|       |   |          |          |       |                     |           |          |          |          |          |          |          |          |          |          |          |
|-------|---|----------|----------|-------|---------------------|-----------|----------|----------|----------|----------|----------|----------|----------|----------|----------|----------|
| 8075  | 3 | 566.919  | 1697.734 | 7.39  | EGKFTDSENVQCER      | sp P43652 | 0.007777 | 2268.6   | 1957.3   | 1775.0   | 1617.6   | 1570.9   | 1232.5   | 1361.4   | 1493.8   | 1624.2   |
| 12335 | 4 | 754.840  | 3015.331 | 12.32 | ELISLVEDVSSNYDGCCE  | sp P43652 | 1.56E-05 | 5205.6   | 3857.9   | 5444.8   | 3942.8   | 5098.5   | 4829.7   | 500.0    | 445.8    | 183.9    |
| 34    | 2 | 657.837  | 1313.659 | 15.06 | VNVDEVGGEALGR       | sp P68871 | 0.000178 | 364307.8 | 317298.8 | 324504.9 | 458338.8 | 471184.3 | 437947.9 | 598138.3 | 515895.8 | 676254.5 |
| 46    | 2 | 466.765  | 931.515  | 11.08 | SAVTALWGK           | sp P68871 | 0.039258 | 151270.3 | 199594.4 | 144741.1 | 173235.9 | 221299.2 | 166629.8 | 196360.9 | 204967.8 | 272198.6 |
| 59    | 4 | 445.005  | 1775.989 | 11.95 | LLGNVLCVLAHHFGK     | sp P68871 | 5.54E-05 | 208965.6 | 184525.8 | 185442.9 | 181185.6 | 191111.3 | 204833.7 | 307944.7 | 316603.7 | 282796.9 |
| 101   | 2 | 689.855  | 1377.695 | 15.06 | EFTPPVQAAYQK        | sp P68871 | 0.000531 | 270712.9 | 275449.3 | 286098.6 | 326429.4 | 431918.6 | 328345.2 | 431225.9 | 395870.0 | 450940.1 |
| 267   | 3 | 438.894  | 1313.660 | 9.42  | VNVDEVGGEALGR       | sp P68871 | 1.23E-05 | 39091.7  | 33869.3  | 35677.0  | 51742.2  | 49132.9  | 48329.2  | 67017.7  | 60893.9  | 73009.5  |
| 328   | 3 | 460.239  | 1377.696 | 10.02 | EFTPPVQAAYQK        | sp P68871 | 3.98E-06 | 50788.3  | 47458.9  | 55488.4  | 60603.2  | 67233.6  | 60578.1  | 82202.9  | 80260.9  | 86359.6  |
| 418   | 3 | 670.987  | 2009.939 | 18.11 | FFESFGDLSTPDAVMGNF  | sp P68871 | 0.007239 | 71009.5  | 107248.9 | 89242.1  | 85932.7  | 82286.9  | 94664.8  | 121591.6 | 127462.7 | 110908.6 |
| 439   | 5 | 518.055  | 2585.238 | 1.47  | GTFATLSELHCCLKHVDP  | sp P68871 | 0.021653 | 59809.6  | 63086.8  | 60567.8  | 66486.1  | 84685.6  | 67166.8  | 74963.5  | 70461.6  | 78369.6  |
| 499   | 3 | 686.989  | 2057.945 | 17.11 | FFESFGDLSTPDAVMGNF  | sp P68871 | 3.01E-05 | 45577.9  | 39147.8  | 43221.2  | 73262.1  | 61689.1  | 77622.0  | 91517.1  | 81945.7  | 73305.0  |
| 519   | 3 | 593.004  | 1775.989 | 11.06 | LLGNVLCVLAHHFGK     | sp P68871 | 0.001011 | 47290.3  | 44466.3  | 40398.3  | 43169.0  | 41988.9  | 52972.4  | 68188.9  | 71406.7  | 56330.3  |
| 797   | 2 | 1029.979 | 2057.943 | 17.90 | FFESFGDLSTPDAVMGNF  | sp P68871 | 0.001587 | 48190.9  | 31604.6  | 49783.0  | 81345.1  | 71247.7  | 91048.1  | 96561.6  | 80906.2  | 63620.8  |
| 2028  | 1 | 932.521  | 931.514  | 3.91  | SAVTALWGK           | sp P68871 | 0.008324 | 10501.6  | 16779.6  | 8942.3   | 15011.4  | 24156.1  | 14042.1  | 11351.8  | 12300.6  | 17764.5  |
| 2177  | 5 | 628.142  | 3135.676 | 4.16  | LLGNVLCVLAHHFGKEF   | sp P68871 | 0.001987 | 19119.4  | 13757.4  | 19407.8  | 19021.5  | 16991.0  | 19759.2  | 31867.2  | 25352.2  | 24600.0  |
| 3183  | 6 | 707.026  | 4236.113 | 4.91  | VLGAFSDGLAHLNLTGK   | sp P68871 | 1.96E-08 | 4027.8   | 3990.4   | 5107.2   | 2442.7   | 2093.2   | 3049.4   | 56365.5  | 41265.3  | 49542.9  |
| 9954  | 4 | 829.420  | 3313.653 | 12.55 | LLVVYPWTQRFFESFGDI  | sp P68871 | 2.22E-07 | 2750.5   | 2976.8   | 3055.0   | 6156.5   | 5693.5   | 6117.5   | 5801.5   | 6547.0   | 5853.1   |
| 44    | 3 | 510.584  | 1528.730 | 10.46 | VGAHAGEYGAEALER     | sp P69905 | 0.032486 | 210000.6 | 287454.2 | 199090.6 | 248129.3 | 310755.7 | 241298.3 | 287942.9 | 309870.6 | 281091.9 |
| 52    | 4 | 459.229  | 1832.888 | 7.34  | TYFPHFDLSHGSAQVK    | sp P69905 | 0.00945  | 224138.9 | 295977.9 | 239890.9 | 257702.8 | 288063.9 | 276892.6 | 321913.5 | 323653.8 | 391930.0 |
| 69    | 2 | 536.282  | 1070.550 | 11.80 | MFLSFPTTK           | sp P69905 | 0.000935 | 105103.2 | 113344.4 | 116254.2 | 159777.9 | 198457.8 | 150424.2 | 216928.5 | 176247.6 | 164100.5 |
| 96    | 3 | 391.228  | 1170.662 | 8.79  | VLSPADKTNVK         | sp P69905 | 8.88E-06 | 64999.0  | 61570.4  | 70777.1  | 84733.3  | 72979.8  | 78099.4  | 125812.0 | 127972.6 | 110992.7 |
| 239   | 3 | 611.970  | 1832.887 | 15.01 | TYFPHFDLSHGSAQVK    | sp P69905 | 0.024113 | 102807.4 | 147151.5 | 105500.5 | 128281.9 | 149968.3 | 138280.8 | 144978.1 | 148358.3 | 183213.6 |
| 478   | 2 | 365.211  | 728.408  | 2.43  | VLSPADK             | sp P69905 | 0.027337 | 44260.5  | 37337.5  | 44946.6  | 56528.9  | 45171.8  | 54034.6  | 49600.5  | 48663.9  | 56503.6  |
| 493   | 5 | 600.105  | 2995.489 | 14.69 | VADALTNAVAHVDDMPN   | sp P69905 | 0.000694 | 54541.0  | 62408.6  | 54089.1  | 91571.4  | 73854.3  | 84878.0  | 73583.9  | 70358.7  | 69418.9  |
| 644   | 2 | 266.648  | 531.281  | 1.45  | AAWGK               | sp P69905 | 0.00292  | 18064.5  | 14330.7  | 17430.6  | 22189.1  | 16758.0  | 20877.8  | 28630.2  | 28988.6  | 32694.0  |
| 727   | 2 | 626.862  | 1251.710 | 16.06 | FLASVSTVLTSK        | sp P69905 | 0.002957 | 33040.3  | 37004.5  | 31689.3  | 48745.7  | 64792.5  | 47291.9  | 33641.5  | 30724.7  | 26172.6  |
| 742   | 3 | 341.856  | 1022.545 | 2.18  | MFLSFPTTK           | sp P69905 | 0.003053 | 17823.8  | 22901.5  | 19513.0  | 19435.2  | 24346.8  | 22060.9  | 27890.3  | 27601.0  | 31889.7  |
| 1138  | 2 | 586.338  | 1170.662 | 13.91 | VLSPADKTNVK         | sp P69905 | 3.84E-06 | 9428.9   | 8360.6   | 9212.5   | 12574.9  | 12478.6  | 11968.1  | 19398.0  | 20193.5  | 18404.5  |
| 1247  | 6 | 710.563  | 4257.334 | 10.43 | LLSHCLLVTLAAHLPAEFT | sp P69905 | 0.000314 | 91576.5  | 85716.0  | 90679.0  | 92382.0  | 79756.7  | 80525.7  | 137765.0 | 133061.5 | 123359.6 |
| 1619  | 5 | 605.734  | 3023.634 | 12.24 | LLSHCLLVTLAAHLPAEFT | sp P69905 | 0.000938 | 31044.4  | 28249.7  | 29334.9  | 47228.4  | 40933.6  | 43951.8  | 31802.3  | 32129.3  | 36421.9  |
| 1654  | 5 | 625.724  | 3123.582 | 11.42 | KVADALTNAVAHVDDMPI  | sp P69905 | 0.002284 | 17606.2  | 17435.8  | 16770.9  | 27906.0  | 24945.9  | 27226.5  | 26848.5  | 27156.0  | 18150.9  |
| 1917  | 5 | 852.473  | 4257.329 | 17.02 | LLSHCLLVTLAAHLPAEFT | sp P69905 | 0.002979 | 73078.6  | 68074.8  | 71403.4  | 74492.8  | 64628.6  | 61435.8  | 112116.3 | 92192.7  | 92134.4  |
| 2407  | 4 | 756.915  | 3023.632 | 19.83 | LLSHCLLVTLAAHLPAEFT | sp P69905 | 0.007884 | 23429.2  | 23250.7  | 26486.6  | 41099.2  | 34046.7  | 35720.4  | 25918.3  | 29810.9  | 29886.8  |
| 10885 | 6 | 763.756  | 4576.493 | 9.92  | LLSHCLLVTLAAHLPAEFT | sp P69905 | 4.22E-08 | 4381.9   | 5330.0   | 4711.0   | 2851.9   | 3042.4   | 3143.6   | 16601.6  | 15337.6  | 15300.8  |

|       |   |          |          |       |                     |           |          |         |         |         |         |         |         |         |          |         |
|-------|---|----------|----------|-------|---------------------|-----------|----------|---------|---------|---------|---------|---------|---------|---------|----------|---------|
| 11189 | 6 | 843.800  | 5056.754 | 13.99 | VDPVNFKLLSHCLLVTLA  | sp P69905 | 5.27E-05 | 7118.5  | 9052.2  | 8561.5  | 5419.2  | 5649.6  | 5401.2  | 8559.8  | 8577.1   | 7253.1  |
| 11638 | 3 | 540.642  | 1618.905 | 8.40  | LWAYLTIEQLLEK       | sp Q06033 | 1.78E-05 | 1223.1  | 1116.9  | 1177.6  | 1680.7  | 1638.8  | 1964.0  | 2434.8  | 2108.8   | 2355.1  |
| 599   | 3 | 402.228  | 1203.664 | 7.85  | FKPTLSQQQK          | sp Q14624 | 2.92E-06 | 17990.5 | 16929.0 | 17300.2 | 21090.9 | 17403.8 | 19065.2 | 34583.7 | 31766.6  | 32729.3 |
| 685   | 2 | 467.275  | 932.535  | 5.85  | NVVFVIDK            | sp Q14624 | 0.004237 | 17411.5 | 21356.8 | 17084.4 | 17842.9 | 15652.3 | 18192.9 | 22524.7 | 24819.7  | 24009.9 |
| 728   | 3 | 339.855  | 1016.542 | 7.57  | FAHTVVTSR           | sp Q14624 | 0.007277 | 10293.4 | 9004.4  | 10610.1 | 12072.1 | 10207.6 | 11551.0 | 14432.6 | 14678.5  | 12351.1 |
| 801   | 4 | 781.878  | 3123.484 | 15.44 | FSSHVGGTLGQFYQEVL   | sp Q14624 | 0.001063 | 80215.4 | 51061.1 | 66720.9 | 77135.7 | 73626.2 | 87426.5 | 37922.9 | 39752.8  | 31279.9 |
| 807   | 4 | 485.769  | 1939.046 | 7.64  | NPLVWVHASPEHVVVTR   | sp Q14624 | 0.040316 | 33342.4 | 45344.0 | 28581.0 | 36217.2 | 46867.9 | 36724.2 | 27926.4 | 33159.7  | 33899.1 |
| 885   | 3 | 805.732  | 2414.175 | 17.38 | QGPVNLLSDPEQGVET    | sp Q14624 | 0.04556  | 62291.7 | 37615.2 | 67344.2 | 66083.7 | 45809.6 | 69129.3 | 35041.6 | 36754.5  | 34745.2 |
| 968   | 2 | 642.836  | 1283.658 | 15.06 | AGFSWIEVTFK         | sp Q14624 | 0.000747 | 22160.2 | 22183.2 | 23401.2 | 29062.6 | 25517.5 | 29555.7 | 22702.1 | 24416.4  | 21974.5 |
| 975   | 2 | 654.334  | 1306.653 | 17.06 | AEAQAQYSAAVAK       | sp Q14624 | 0.005878 | 26043.9 | 27205.1 | 22490.7 | 26033.0 | 30991.0 | 27597.8 | 35252.9 | 35767.7  | 30747.9 |
| 1075  | 3 | 604.656  | 1810.946 | 5.92  | SPEQQETVLDGNLIIR    | sp Q14624 | 0.001997 | 21053.0 | 18233.2 | 25194.0 | 26232.7 | 25384.3 | 27772.0 | 40529.3 | 33042.4  | 34002.7 |
| 1152  | 2 | 500.283  | 998.552  | 6.73  | LALDNGGLAR          | sp Q14624 | 0.002437 | 9837.2  | 8728.0  | 8304.7  | 9896.0  | 12161.1 | 10027.1 | 13426.3 | 13235.7  | 14290.9 |
| 1172  | 2 | 464.759  | 927.504  | 6.33  | ILDDLSPR            | sp Q14624 | 0.007558 | 14241.9 | 17410.9 | 13405.8 | 16750.2 | 15804.6 | 15263.5 | 20446.1 | 18863.4  | 22298.1 |
| 1210  | 3 | 323.207  | 966.600  | 6.10  | VRPQQLVK            | sp Q14624 | 0.015064 | 8025.9  | 7464.7  | 7897.7  | 9319.3  | 8109.6  | 9016.6  | 9503.9  | 9558.7   | 9988.5  |
| 1461  | 2 | 500.776  | 999.537  | 6.78  | LALDNGGLAR          | sp Q14624 | 0.015831 | 5957.4  | 7826.4  | 7880.9  | 8487.5  | 10722.8 | 8767.2  | 10406.5 | 9031.9   | 11106.5 |
| 1472  | 3 | 552.970  | 1655.888 | 7.10  | LQDRGPDVLTATVSGK    | sp Q14624 | 0.000766 | 14502.2 | 16497.6 | 14490.7 | 16079.1 | 17362.9 | 18269.8 | 12986.0 | 11966.8  | 12363.8 |
| 1576  | 2 | 906.480  | 1810.945 | 13.90 | SPEQQETVLDGNLIIR    | sp Q14624 | 0.016069 | 27507.7 | 22362.4 | 29549.3 | 32304.7 | 35594.1 | 33595.4 | 46083.1 | 34620.2  | 34177.0 |
| 1610  | 5 | 723.145  | 3610.689 | 7.40  | DTDRFSSHVGGTLGQFY   | sp Q14624 | 0.000635 | 31866.2 | 29491.2 | 31150.4 | 28673.4 | 23763.1 | 28199.5 | 40703.2 | 47256.6  | 47605.4 |
| 1611  | 3 | 891.443  | 2671.308 | 22.97 | QGPVNLLSDPEQGVET    | sp Q14624 | 5.08E-07 | 24059.9 | 30608.4 | 22204.6 | 17614.9 | 20380.5 | 15797.4 | 99139.9 | 100804.1 | 84860.6 |
| 1694  | 3 | 987.849  | 2960.527 | 21.04 | LWAYLTIQQLLEQTVSAS  | sp Q14624 | 0.018615 | 44432.0 | 40810.7 | 50475.9 | 65306.2 | 54494.8 | 58153.5 | 50778.9 | 48692.9  | 39175.4 |
| 1900  | 4 | 546.781  | 2183.096 | 12.80 | QLGLPGPPDVPDHAAYHI  | sp Q14624 | 0.003852 | 21439.9 | 24850.7 | 21905.0 | 22381.1 | 22183.1 | 21428.3 | 16891.5 | 16146.3  | 20287.7 |
| 2005  | 2 | 415.728  | 829.442  | 3.95  | SIQNNVR             | sp Q14624 | 0.004077 | 12822.6 | 10631.5 | 12727.9 | 14227.6 | 11744.0 | 13630.3 | 22283.7 | 23393.0  | 25236.5 |
| 2176  | 3 | 405.892  | 1214.654 | 3.92  | MNFRPGVLSSR         | sp Q14624 | 1.23E-05 | 5586.9  | 4868.3  | 5284.5  | 5339.1  | 5655.7  | 5066.7  | 9352.6  | 9437.8   | 8374.2  |
| 2263  | 4 | 741.139  | 2960.527 | 19.32 | LWAYLTIQQLLEQTVSAS  | sp Q14624 | 0.007685 | 21296.1 | 19844.1 | 24099.7 | 29829.9 | 24783.4 | 28740.5 | 29927.6 | 28221.8  | 24416.5 |
| 2375  | 2 | 748.917  | 1495.820 | 16.06 | ITFELVYEELLK        | sp Q14624 | 0.00028  | 16931.5 | 13192.1 | 17264.3 | 21902.5 | 20807.4 | 22958.6 | 14852.7 | 16010.2  | 15432.7 |
| 2620  | 5 | 641.946  | 3204.694 | 12.42 | AGFSWIEVTFKNPLVWV   | sp Q14624 | 2.48E-07 | 12354.5 | 10575.6 | 11275.2 | 10945.1 | 8800.2  | 9030.5  | 37670.9 | 41887.5  | 39697.0 |
| 2963  | 4 | 736.160  | 2940.613 | 15.65 | TGLLLLSDPKVTIGLLFV  | sp Q14624 | 0.000494 | 12815.3 | 12092.2 | 14920.4 | 13826.7 | 13592.9 | 11352.2 | 19630.9 | 21550.7  | 23683.2 |
| 3205  | 3 | 375.190  | 1122.548 | 3.47  | NVHSGSTFFK          | sp Q14624 | 1.91E-05 | 2923.7  | 3188.1  | 2774.1  | 3393.2  | 3650.7  | 3466.0  | 4310.0  | 4594.5   | 4456.5  |
| 3271  | 4 | 1300.381 | 5197.495 | 16.06 | RIHEDSDSALQLQDFYQE  | sp Q14624 | 0.002654 | 35479.0 | 25247.2 | 38644.3 | 54909.1 | 49244.0 | 53886.7 | 56447.5 | 54908.4  | 54505.3 |
| 3311  | 3 | 810.454  | 2428.340 | 14.91 | TGLLLLSDPKVTIGLLFV  | sp Q14624 | 7.41E-09 | 17367.2 | 15938.6 | 16694.2 | 23384.1 | 22226.8 | 23772.2 | 6332.3  | 5667.1   | 5653.5  |
| 4531  | 5 | 1040.507 | 5197.496 | 17.28 | RIHEDSDSALQLQDFYQE  | sp Q14624 | 0.00168  | 17400.8 | 13021.7 | 19178.6 | 28133.5 | 22994.1 | 24667.5 | 27251.0 | 29711.7  | 26555.6 |
| 4688  | 4 | 1261.356 | 5041.395 | 18.28 | IHEDSDSALQLQDFYQEV  | sp Q14624 | 1.46E-05 | 21011.2 | 24822.4 | 24542.5 | 27684.3 | 27373.7 | 30549.8 | 32442.9 | 29334.0  | 29025.3 |
| 5970  | 3 | 499.614  | 1495.820 | 7.92  | ITFELVYEELLK        | sp Q14624 | 0.000929 | 2762.0  | 2125.0  | 2757.3  | 3762.2  | 3390.9  | 3530.4  | 2555.5  | 2723.5   | 2822.8  |
| 6042  | 4 | 1043.543 | 4170.142 | 17.30 | ILDDLSPRDQFNLIWFSTE | sp Q14624 | 4.05E-07 | 4980.4  | 3996.5  | 4078.7  | 4585.7  | 4647.4  | 3448.2  | 37064.1 | 28580.8  | 25018.2 |

|       |   |          |          |       |                               |          |        |        |        |         |         |         |         |         |         |
|-------|---|----------|----------|-------|-------------------------------|----------|--------|--------|--------|---------|---------|---------|---------|---------|---------|
| 6425  | 3 | 800.057  | 2397.150 | 16.38 | QGPVLLSDPEQGVET sp Q14624     | 0.000216 | 7688.6 | 6962.1 | 8900.8 | 9597.2  | 7361.4  | 9046.6  | 5035.9  | 3964.4  | 4119.8  |
| 6633  | 3 | 865.130  | 2592.368 | 17.38 | LPEGSVSLIILLTDGDPTV sp Q14624 | 1.06E-06 | 9945.4 | 7328.9 | 7585.7 | 13733.1 | 11277.4 | 13809.1 | 3274.1  | 2836.2  | 2865.8  |
| 13072 | 5 | 1009.286 | 5041.396 | 13.55 | IHEDSDSALQLQDFYQEV sp Q14624  | 2.26E-05 | 3775.3 | 4072.8 | 4016.4 | 4988.9  | 4187.5  | 4950.8  | 6046.9  | 5599.4  | 5034.6  |
| 15097 | 5 | 835.036  | 4170.144 | 1.43  | ILDDLSPRDQFNLIWFSTE sp Q14624 | 1.28E-07 | 982.1  | 853.7  | 940.8  | 844.2   | 819.3   | 598.0   | 6921.2  | 5694.6  | 5575.2  |
| 26410 | 3 | 1681.474 | 5041.401 | 12.32 | IHEDSDSALQLQDFYQEV sp Q14624  | 0.001742 | 2483.5 | 2324.4 | 2483.3 | 2702.4  | 2549.4  | 3392.0  | 3300.8  | 2237.9  | 3230.6  |
| 29203 | 4 | 866.926  | 3463.675 | 17.58 | SFAAGIQALGGTNINDAM sp Q14624  | 0.000148 | 399.8  | 436.9  | 492.3  | 1038.6  | 833.5   | 1018.7  | 630.8   | 429.3   | 415.5   |
| 32032 | 3 | 1155.565 | 3463.673 | 17.35 | SFAAGIQALGGTNINDAM sp Q14624  | 7.57E-05 | 565.6  | 489.9  | 415.5  | 1227.4  | 1019.5  | 1270.3  | 258.1   | 411.0   | 412.2   |
| 35576 | 5 | 1208.813 | 6039.030 | 12.99 | SFAAGIQALGGTNINDAM sp Q14624  | 0.000794 | 561.5  | 518.2  | 607.0  | 512.7   | 336.7   | 569.7   | 1487.0  | 1093.8  | 1272.9  |
| 23997 | 3 | 961.183  | 2880.528 | 19.90 | EYGVVLAPDGSTVAVEPL sp Q96PD5  | 0.002565 | 1124.6 | 871.0  | 1002.6 | 1701.6  | 1510.0  | 1535.0  | 727.1   | 367.4   | 255.7   |
| 3840  | 2 | 730.382  | 1458.750 | 16.06 | FGQSGPIVLDVDR sp Q9UGM        | 9.13E-08 | 16.0   | 40.1   | 44.4   | 148.4   | 102.2   | 139.8   | 32908.2 | 31938.8 | 29266.2 |

Supplementary Table S2. The 80 WGA-enriched plasma proteins selected for protein quantification

|               |          |              |                                                       |               | Non-metastatic CRC vs Healthy control |                 |                 |                   |                            |         | Metastatic CRC vs Healthy control |                |                |                   |                           |       |
|---------------|----------|--------------|-------------------------------------------------------|---------------|---------------------------------------|-----------------|-----------------|-------------------|----------------------------|---------|-----------------------------------|----------------|----------------|-------------------|---------------------------|-------|
| UniProt       | Gene     | ID           | Description                                           | Peptides used | NM1/<br>Avg Ctr                       | NM2/<br>Avg Ctr | NM2/<br>Avg Ctr | LOG 10<br>p value | Fold<br>change<br>(NM/Ctr) | p-value | M1/<br>Avg Ctr                    | M2/<br>Avg Ctr | M3/<br>Avg Ctr | LOG 10<br>p value | Fold<br>change<br>(M/Ctr) |       |
| sp Q9UGM3     | DMBT1    | DMBT1_HUMAN  | Deleted in malignant brain tumors 1 protein           | 1             | 4.43                                  | 3.05            | 4.17            | 1.6806            | 0.0209                     | 3.88    | 1.15                              | 1.22           | 1.15           | 2.9189            | 0.0012                    | 1.17  |
| sp P01833     | PIGR     | PIGR_HUMAN   | Polymeric immunoglobulin receptor                     | 1             | 2.07                                  | 1.87            | 1.48            | 1.3583            | 0.0438                     | 1.80    | -1.35                             | -1.36          | -1.28          | 2.1955            | 0.0064                    | -1.33 |
| sp P04003     | C4BPA    | C4BPA_HUMAN  | C4b-binding protein alpha chain                       | 1             | 1.36                                  | 1.00            | 1.24            | 0.7081            | >0.05                      | 1.20    | 1.24                              | 1.22           | 1.21           | 1.7400            | 0.0182                    | 1.23  |
| sp Q06033     | ITIH3    | ITIH3_HUMAN  | Inter-alpha-trypsin inhibitor heavy chain H3          | 1             | 1.43                                  | 1.40            | 1.68            | 1.5403            | 0.0288                     | 1.50    | 1.43                              | 1.49           | 1.42           | 2.1251            | 0.0075                    | 1.44  |
| sp P08603     | CFH      | CFAH_HUMAN   | Complement factor H                                   | 1             | 1.02                                  | 1.18            | 1.01            | 0.5018            | >0.05                      | 1.07    | 1.61                              | 1.62           | 1.59           | 2.3020            | 0.0050                    | 1.60  |
| sp P00736     | C1R      | C1R_HUMAN    | Complement C1r subcomponent                           | 1             | 1.81                                  | 1.19            | 1.39            | 0.9024            | >0.05                      | 1.47    | 1.02                              | -1.10          | -1.09          | 1.4201            | 0.0380                    | -0.39 |
| sp P02042     | HBD      | HBD_HUMAN    | Hemoglobin subunit delta                              | 1             | 1.06                                  | 1.60            | 1.11            | 0.5557            | >0.05                      | 1.25    | -1.71                             | -1.62          | -1.76          | 1.6317            | 0.0233                    | -1.70 |
| sp O75882     | ATRNL1   | ATRNL1_HUMAN | Attractin                                             | 1             | -1.22                                 | -1.22           | -1.20           | 5.0120            | <0.0001                    | -1.21   | -1.08                             | -1.18          | -1.10          | 0.6718            | >0.05                     | -1.12 |
| sp P01714     | IGLV3-19 | LV319_HUMAN  | Immunoglobulin lambda variable 3-19                   | 1             | -1.01                                 | -1.40           | -1.19           | 2.5872            | 0.0026                     | -1.20   | 20.85                             | 18.60          | 24.18          | 0.3632            | >0.05                     | 21.21 |
| sp P06276     | BCHE     | CHLE_HUMAN   | Cholinesterase                                        | 1             | 1.00                                  | 1.04            | 1.00            | 0.4855            | >0.05                      | 1.01    | -1.15                             | -1.15          | -1.21          | 2.9835            | 0.0010                    | -1.17 |
| sp P05546     | SERPIND1 | HEP2_HUMAN   | Heparin cofactor 2                                    | 1             | 1.08                                  | -1.05           | -1.02           | 0.7001            | >0.05                      | -0.33   | 1.02                              | 1.07           | -1.04          | 3.6544            | 0.0002                    | 0.35  |
| sp P00748     | F12      | FA12_HUMAN   | Coagulation factor XII                                | 1             | 1.21                                  | 1.17            | 1.12            | 1.6106            | 0.0245                     | 1.16    | 1.10                              | 1.06           | 1.10           | 2.4333            | 0.0037                    | 1.09  |
| sp O75636     | FCN3     | FCN3_HUMAN   | Ficolin-3                                             | 1             | 1.11                                  | 1.06            | 1.10            | 1.4551            | 0.0351                     | 1.09    | -2.05                             | -2.10          | -2.00          | 3.2078            | 0.0006                    | -2.05 |
| sp A0A075B6H9 | IGLV4-69 | LV469_HUMAN  | Immunoglobulin lambda variable 4-69                   | 1             | 1.24                                  | -1.02           | 1.17            | 0.2645            | >0.05                      | 0.46    | 1.60                              | 1.53           | 1.66           | 2.9170            | 0.0012                    | 1.60  |
| sp P27169     | PON1     | PON1_HUMAN   | Serum paraoxonase/arylesterase 1                      | 1             | 1.30                                  | 1.22            | 1.27            | 2.0805            | 0.0083                     | 1.26    | -1.79                             | -2.01          | -2.02          | 3.7121            | 0.0002                    | -1.94 |
| sp O75460     | ERN1     | ERN1_HUMAN   | Serine/threonine-protein kinase/endoribonuclease IRE1 | 1             | 1.53                                  | 1.42            | 1.72            | 1.6264            | 0.0236                     | 1.56    | 1.30                              | 1.21           | 1.25           | 3.1571            | 0.0007                    | 1.25  |
| sp P01817     | HV205    | HV205_HUMAN  | Immunoglobulin heavy variable 2-5                     | 1             | -1.07                                 | -1.37           | -1.16           | 2.8053            | 0.0016                     | -1.20   | -1.15                             | -1.18          | -1.32          | 2.7597            | 0.0017                    | -1.21 |
| sp Q96PD5     | PGLYRP2  | PGRP2_HUMAN  | N-acetylmuramoyl-L-alanine amidase                    | 1             | 1.70                                  | 1.51            | 1.54            | 1.9797            | 0.0105                     | 1.58    | 1.34                              | 1.30           | 1.28           | 1.4248            | 0.0376                    | 1.30  |
| sp P06681     | C2       | CO2_HUMAN    | Complement C2                                         | 2             | 1.04                                  | -1.24           | 1.07            | 0.3459            | >0.05                      | 0.29    | 1.39                              | 1.47           | 1.38           | 3.6505            | 0.0002                    | 1.42  |
| sp P02774     | GC       | VTDB_HUMAN   | Vitamin D-binding protein                             | 2             | -1.42                                 | -1.99           | -1.71           | 2.4406            | 0.0036                     | -1.71   | 1.51                              | 1.53           | 1.38           | 1.9913            | 0.0102                    | 1.47  |
| sp P06310     | IGKV2-30 | KV230_HUMAN  | Immunoglobulin kappa variable 2-30                    | 2             | -1.22                                 | -1.19           | -1.09           | 3.4605            | 0.0003                     | -1.17   | -1.37                             | -2.72          | -3.91          | 0.8236            | >0.05                     | -2.67 |
| sp P00739     | HPR      | HPTR_HUMAN   | Haptoglobin-related protein                           | 2             | -1.03                                 | 1.31            | 1.09            | 0.2664            | >0.05                      | 0.46    | -1.46                             | -1.40          | -1.43          | 0.2515            | >0.05                     | -1.43 |
| sp P25311     | AZGP1    | ZA2G_HUMAN   | Zinc-alpha-2-glycoprotein                             | 2             | -1.35                                 | -1.61           | -1.30           | 2.7877            | 0.0016                     | -1.42   | -1.03                             | -1.09          | 1.05           | 0.7114            | >0.05                     | -0.36 |
| sp O43866     | CD5L     | CD5L_HUMAN   | CD5 antigen-like                                      | 2             | -1.06                                 | -1.15           | -1.18           | 3.4928            | 0.0003                     | -1.13   | 1.20                              | 1.15           | 1.23           | 0.7263            | >0.05                     | 1.19  |
| sp P02753     | RBP4     | RET4_HUMAN   | Retinol-binding protein 4                             | 2             | 1.26                                  | 1.17            | 1.24            | 1.8320            | 0.0147                     | 1.22    | -1.88                             | -1.80          | -1.95          | 3.9514            | 0.0001                    | -1.87 |
| sp P06312     | IGKV4-1  | KV401_HUMAN  | Immunoglobulin kappa variable 4-1                     | 2             | -1.15                                 | 1.01            | -1.08           | 0.7329            | >0.05                      | -0.41   | 1.05                              | 1.07           | 1.01           | 3.6891            | 0.0002                    | 1.05  |
| sp P02787     | TF       | TRFE_HUMAN   | Serotransferrin                                       | 2             | -1.26                                 | -1.34           | -1.24           | 3.8060            | 0.0002                     | -1.28   | -1.77                             | -1.89          | -1.90          | 3.6705            | 0.0002                    | -1.85 |
| sp P01877     | IGHA2    | IGHA2_HUMAN  | Immunoglobulin heavy constant alpha 2                 | 3             | -1.12                                 | -1.19           | -1.11           | 3.9034            | 0.0001                     | -1.14   | -2.26                             | -2.27          | -2.69          | 2.3654            | 0.0043                    | -2.41 |
| sp P01860     | IGHG3    | IGHG3_HUMAN  | Immunoglobulin heavy constant gamma 3                 | 3             | -1.54                                 | -1.66           | -1.62           | 3.7221            | 0.0002                     | -1.61   | 1.12                              | 1.15           | 1.45           | 3.2581            | 0.0006                    | 1.24  |
| sp P02748     | C9       | CO9_HUMAN    | Complement component C9                               | 4             | 1.92                                  | 1.52            | 1.63            | 1.5555            | 0.0278                     | 1.69    | -1.36                             | -1.37          | -1.57          | 1.8598            | 0.0138                    | -1.43 |
| sp P0C0L5     | C4B      | CO4B_HUMAN   | Complement C4-B                                       | 4             | 1.61                                  | 1.35            | 1.49            | 1.6373            | 0.0231                     | 1.48    | 1.47                              | 1.42           | 1.31           | 2.3035            | 0.0050                    | 1.40  |
| sp P00751     | CFB      | CFAB_HUMAN   | Complement factor B                                   | 4             | -1.07                                 | -1.10           | -1.17           | 3.6899            | 0.0002                     | -1.11   | 1.31                              | 1.52           | 1.29           | 1.8904            | 0.0129                    | 1.37  |
| sp P22792     | CPN2     | CPN2_HUMAN   | Carboxypeptidase N subunit 2                          | 4             | -1.04                                 | -1.27           | -1.19           | 3.0374            | 0.0009                     | -1.17   | -1.08                             | -1.18          | -1.10          | 3.7174            | 0.0002                    | -1.12 |
| sp P08185     | SERPINA6 | CBG_HUMAN    | Corticosteroid-binding globulin                       | 4             | 1.08                                  | -1.23           | 1.05            | 0.3409            | >0.05                      | 0.30    | -1.45                             | -1.53          | -1.27          | 3.1342            | 0.0007                    | -1.42 |
| sp P08697     | SERPINF2 | A2AP_HUMAN   | Alpha-2-antiplasmin                                   | 4             | -1.17                                 | -1.19           | -1.27           | 3.6782            | 0.0002                     | -1.21   | 1.70                              | 1.64           | 1.81           | 3.3709            | 0.0004                    | 1.71  |
| sp P0C0L4     | C4A      | CO4A_HUMAN   | Complement C4-A                                       | 5             | 2.22                                  | 1.65            | 2.28            | 1.4556            | 0.0350                     | 2.05    | 1.78                              | 1.94           | 1.62           | 3.6756            | 0.0002                    | 1.78  |
| sp P01861     | IGHG4    | IGHG4_HUMAN  | Immunoglobulin heavy constant gamma 4                 | 5             | -1.41                                 | -1.82           | -1.52           | 2.6408            | 0.0023                     | -1.58   | -1.38                             | -1.30          | -1.41          | 3.2839            | 0.0005                    | -1.36 |
| sp P02751     | FN1      | FINC_HUMAN   | Fibronectin                                           | 5             | -1.44                                 | -1.69           | -1.51           | 3.0557            | 0.0009                     | -1.55   | 1.63                              | 1.52           | 1.69           | 3.9954            | 0.0001                    | 1.61  |
| sp P01031     | C5       | CO5_HUMAN    | Complement C5                                         | 6             | 1.53                                  | 1.39            | 1.61            | 1.7824            | 0.0165                     | 1.51    | 1.50                              | 1.50           | 1.62           | 1.6814            | 0.0208                    | 1.54  |
| sp P02743     | APCS     | SAMP_HUMAN   | Serum amyloid P-component                             | 6             | 1.10                                  | 1.10            | 1.11            | 3.0010            | 0.0010                     | 1.11    | -2.62                             | -2.68          | -2.68          | 4.5590            | <0.0001                   | -2.66 |
| sp P01859     | IGHG2    | IGHG2_HUMAN  | Immunoglobulin heavy constant gamma 2                 | 6             | -1.24                                 | -1.26           | -1.25           | 5.0495            | <0.0001                    | -1.25   | 1.04                              | 1.05           | -1.06          | 3.3132            | 0.0005                    | 0.34  |

|           |          |             |                                                                        |     |       |       |       |        |         |       |       |       |       |        |         |       |
|-----------|----------|-------------|------------------------------------------------------------------------|-----|-------|-------|-------|--------|---------|-------|-------|-------|-------|--------|---------|-------|
| sp P02766 | TTR      | TTHY_HUMAN  | Transthyretin                                                          | 6   | 1.03  | 1.04  | 1.00  | 0.7072 | >0.05   | 1.02  | -1.32 | -1.41 | -1.40 | 3.8191 | 0.0002  | -1.37 |
| sp P35858 | IGFALS   | ALS_HUMAN   | Insulin-like growth factor-binding protein complex acid labile subunit | 6   | -1.20 | -1.27 | -1.23 | 4.0780 | 0.0001  | -1.23 | -1.64 | -1.72 | -1.76 | 3.6588 | 0.0002  | -1.71 |
| sp P01591 | JCHAIN   | IGJ_HUMAN   | Immunoglobulin J chain                                                 | 7   | -1.16 | -1.09 | -1.17 | 3.8530 | 0.0001  | -1.14 | -2.10 | -2.09 | -1.96 | 1.9099 | 0.0123  | -2.05 |
| sp P04004 | VTN      | VTNC_HUMAN  | Vitronectin                                                            | 7   | -1.09 | -1.03 | -1.06 | 4.1237 | 0.0001  | -1.06 | -1.17 | -1.17 | -1.21 | 4.5078 | <0.0001 | -1.18 |
| sp P01019 | AGT      | ANGT_HUMAN  | Angiotensinogen                                                        | 7   | -1.18 | -1.39 | -1.30 | 3.1245 | 0.0008  | -1.29 | -1.24 | -1.27 | -1.22 | 3.7820 | 0.0002  | -1.25 |
| sp P10909 | CLU      | CLUS_HUMAN  | Clusterin                                                              | 8   | -1.05 | 1.09  | -1.03 | 0.6967 | >0.05   | -0.33 | -1.04 | -1.02 | -1.12 | 1.8484 | 0.0142  | -1.06 |
| sp P01834 | IGKC     | IGKC_HUMAN  | Immunoglobulin kappa constant                                          | 9   | -1.01 | 1.06  | -1.02 | 0.7058 | >0.05   | -0.32 | 1.06  | 1.04  | 1.00  | 0.3490 | >0.05   | 1.03  |
| sp P04217 | A1BG     | A1BG_HUMAN  | Alpha-1B-glycoprotein                                                  | 9   | -1.31 | -1.12 | -1.36 | 2.9758 | 0.0011  | -1.26 | -2.00 | -1.95 | -1.97 | 3.6628 | 0.0002  | -1.98 |
| sp P01857 | IGHG1    | IGHG1_HUMAN | Immunoglobulin heavy constant gamma 1                                  | 9   | -1.25 | -1.18 | -1.20 | 4.1486 | 0.0001  | -1.21 | 1.16  | 1.15  | 1.21  | 4.3015 | <0.0001 | 1.17  |
| sp P02760 | AMBP     | AMBP_HUMAN  | Protein AMBP                                                           | 10  | 1.36  | 1.38  | 1.40  | 3.1674 | 0.0007  | 1.38  | -1.04 | -1.04 | -1.01 | 2.4293 | 0.0037  | -1.03 |
| sp P19652 | ORM2     | A1AG2_HUMAN | Alpha-1-acid glycoprotein 2                                            | 12  | 1.14  | 1.10  | 1.06  | 0.3826 | 0.0334  | 1.10  | -1.66 | -1.70 | -1.97 | 0.3324 | >0.05   | -1.78 |
| sp P04114 | APOB     | APOB_HUMAN  | Apolipoprotein B-100                                                   | 12  | 1.20  | 1.29  | 1.14  | 1.4087 | 0.0390  | 1.21  | 2.43  | 2.48  | 3.14  | 4.3344 | <0.0001 | 2.68  |
| sp P04196 | HRG      | HRG_HUMAN   | Histidine-rich glycoprotein                                            | 13  | 1.16  | 1.05  | 1.19  | 1.0474 | >0.05   | 1.13  | -1.29 | -1.23 | -1.40 | 0.7782 | >0.05   | -1.31 |
| sp P02750 | LRG1     | A2GL_HUMAN  | Leucine-rich alpha-2-glycoprotein                                      | 14  | 1.29  | 1.23  | 1.33  | 2.0089 | 0.0098  | 1.28  | 1.14  | 1.16  | 1.12  | 4.4624 | <0.0001 | 1.14  |
| sp P02763 | ORM1     | A1AG1_HUMAN | Alpha-1-acid glycoprotein 1                                            | 14  | 1.18  | 1.41  | 1.19  | 1.1401 | >0.05   | 1.26  | -1.01 | 1.05  | 1.10  | 2.2969 | 0.0050  | 0.38  |
| sp P68871 | HBB      | HBB_HUMAN   | Hemoglobin subunit beta                                                | 15  | 1.20  | 1.33  | 1.22  | 1.5893 | 0.0257  | 1.25  | 1.30  | 1.35  | 1.29  | 2.2000 | 0.0063  | 1.31  |
| sp P05155 | SERPING1 | IC1_HUMAN   | Plasma protease C1 inhibitor                                           | 15  | 1.24  | 1.32  | 1.18  | 1.6132 | 0.0244  | 1.25  | -1.09 | -1.10 | -1.24 | 0.9416 | >0.05   | -1.14 |
| sp P01042 | KNG1     | KNG1_HUMAN  | Kininogen-1                                                            | 16  | 1.11  | 1.07  | 1.08  | 1.7536 | 0.0176  | 1.09  | 1.11  | 1.09  | 1.02  | 2.6543 | 0.0022  | 1.07  |
| sp P69905 | HBA1     | HBA_HUMAN   | Hemoglobin subunit alpha                                               | 18  | 1.18  | 1.25  | 1.15  | 1.6009 | 0.0251  | 1.19  | 1.38  | 1.24  | 1.42  | 3.1304 | 0.0007  | 1.35  |
| sp P00734 | F2       | THRB_HUMAN  | Prothrombin                                                            | 18  | 1.18  | 1.29  | 1.14  | 1.3545 | 0.0442  | 1.20  | -1.05 | -1.08 | -1.04 | 2.4916 | 0.0032  | -1.05 |
| sp P01876 | IGHA1    | IGHA1_HUMAN | Immunoglobulin heavy constant alpha 1                                  | 18  | -1.13 | -1.28 | -1.18 | 3.4045 | 0.0004  | -1.20 | -1.19 | -1.21 | -1.16 | 0.3482 | >0.05   | -1.19 |
| sp P01008 | SERPINC1 | ANT3_HUMAN  | Antithrombin-III                                                       | 19  | -1.29 | -1.21 | -1.26 | 3.9674 | 0.0001  | -1.25 | 1.05  | 1.02  | 1.16  | 4.5439 | <0.0001 | 1.08  |
| sp P43652 | AFM      | AFAM_HUMAN  | Afamin                                                                 | 19  | -1.25 | -1.21 | -1.26 | 4.3004 | 0.0001  | -1.24 | -2.39 | -2.56 | -2.63 | 4.6107 | <0.0001 | -2.53 |
| sp P19827 | ITIH1    | ITIH1_HUMAN | Inter-alpha-trypsin inhibitor heavy chain H1                           | 20  | 1.22  | 1.20  | 1.14  | 1.7732 | 0.0169  | 1.19  | 2.08  | 1.80  | 2.01  | 1.2260 | >0.05   | 1.96  |
| sp P19823 | ITIH2    | ITIH2_HUMAN | Inter-alpha-trypsin inhibitor heavy chain H2                           | 22  | 1.20  | 1.14  | 1.18  | 1.9533 | 0.0111  | 1.17  | 1.35  | 1.32  | 1.26  | 0.7576 | >0.05   | 1.31  |
| sp P02765 | AHSG     | FETUA_HUMAN | N Alpha-2-HS-glycoprotein                                              | 23  | 1.18  | 1.05  | 1.16  | 1.0702 | >0.05   | 1.13  | -1.80 | -1.84 | -1.62 | 0.8860 | >0.05   | -1.75 |
| sp P01011 | SERPINA3 | AACT_HUMAN  | Alpha-1-antichymotrypsin                                               | 24  | 1.30  | 1.24  | 1.22  | 2.0698 | 0.0085  | 1.25  | -1.31 | -1.35 | -1.24 | 2.2267 | 0.0059  | -1.30 |
| sp P02671 | FGA      | FIBA_HUMAN  | Fibrinogen alpha chain                                                 | 32  | -1.28 | -1.31 | -1.30 | 4.7869 | <0.0001 | -1.30 | 1.94  | 2.00  | 2.12  | 1.7400 | 0.0182  | 2.02  |
| sp P02679 | FGG      | FIBG_HUMAN  | Fibrinogen gamma chain                                                 | 32  | -1.25 | -1.27 | -1.25 | 5.0410 | <0.0001 | -1.26 | 1.40  | 1.37  | 1.40  | 1.5949 | 0.0254  | 1.39  |
| sp P01871 | IGHM     | IGHM_HUMAN  | Immunoglobulin heavy constant mu                                       | 34  | -1.26 | -1.21 | -1.28 | 4.0846 | 0.0001  | -1.25 | 1.04  | -1.08 | 1.00  | 4.4724 | <0.0001 | 0.32  |
| sp P02675 | FGB      | FIBB_HUMAN  | Fibrinogen beta chain                                                  | 37  | -1.40 | -1.42 | -1.33 | 3.9636 | 0.0001  | -1.38 | 1.19  | 1.28  | -1.09 | 2.0217 | 0.0095  | 0.46  |
| sp P01009 | SERPINA1 | A1AT_HUMAN  | Alpha-1-antitrypsin                                                    | 37  | 1.03  | 1.10  | 1.00  | 0.5353 | >0.05   | 1.04  | 1.10  | 1.04  | 1.09  | 4.4053 | <0.0001 | 1.08  |
| sp Q14624 | ITIH4    | ITIH4_HUMAN | Inter-alpha-trypsin inhibitor heavy chain H4                           | 40  | 1.20  | 1.11  | 1.19  | 1.5999 | 0.0251  | 1.17  | 1.74  | 1.75  | 1.74  | 2.1681 | 0.0068  | 1.74  |
| sp P02790 | HPX      | HEMO_HUMAN  | Hemopexin                                                              | 45  | 1.46  | 1.46  | 1.46  | 4.6672 | <0.0001 | 1.46  | 1.12  | 1.05  | 1.02  | 2.3839 | 0.0041  | 1.07  |
| sp P00738 | HP       | HPT_HUMAN   | Haptoglobin                                                            | 60  | 1.04  | 1.14  | 1.04  | 0.8076 | >0.05   | 1.07  | 1.30  | 1.24  | 1.24  | 2.5493 | 0.0028  | 1.26  |
| sp P02768 | ALB      | ALBU_HUMAN  | Serum albumin                                                          | 63  | -1.42 | -1.32 | -1.81 | 2.4520 | 0.0035  | -1.52 | -1.50 | -1.50 | -1.51 | 4.4652 | <0.0001 | -1.51 |
| sp P00450 | CP       | CERU_HUMAN  | Ceruloplasmin                                                          | 82  | 1.37  | 1.41  | 1.33  | 2.4194 | 0.0038  | 1.37  | -1.55 | -1.58 | -2.06 | 2.7328 | 0.0019  | -1.73 |
| sp P01024 | C3       | CO3_HUMAN   | Complement C3                                                          | 128 | 1.40  | 1.38  | 1.38  | 3.7168 | 0.0002  | 1.39  | 1.14  | 1.14  | 1.09  | 4.0388 | 0.0001  | 1.12  |
| sp P01023 | A2M      | A2MG_HUMAN  | Alpha-2-macroglobulin                                                  | 168 | 1.02  | 1.00  | -1.01 | 0.3699 | >0.05   | 0.33  | -1.32 | -1.36 | -1.37 | 7.6089 | <0.0001 | -1.35 |



Supplementary Table S3. List of the 62 WGA-enriched plasma proteins containing at least 2 peptides and their fold change in non-metastatic and metastatic CRC patients compared to those of the healthy controls

| UniProt   | Gene     | ID          | Description                                  | Peptides used | Non-metastatic CRC vs Healthy control |                      | Metastatic CRC vs Healthy control |                     |
|-----------|----------|-------------|----------------------------------------------|---------------|---------------------------------------|----------------------|-----------------------------------|---------------------|
|           |          |             |                                              |               | p-value                               | Fold change (NM/Ctr) | p-value                           | Fold change (M/Ctr) |
| sp P00738 | HP       | HPT_HUMAN   | Haptoglobin                                  | 60            | >0.05                                 | 1.07                 | 0.0028                            | 2.02                |
| sp P02748 | C9       | CO9_HUMAN   | Complement component C9                      | 4             | 0.0278                                | 1.69                 | 0.0138                            | 1.78                |
| sp P02750 | LRG1     | A2GL_HUMAN  | Leucine-rich alpha-2-glycoprotein            | 14            | 0.0098                                | 1.28                 | 0.0000                            | 1.74                |
| sp P02763 | ORM1     | A1AG1_HUMAN | Alpha-1-acid glycoprotein 1                  | 14            | >0.05                                 | 1.26                 | 0.0050                            | 1.71                |
| sp P68871 | HBB      | HBB_HUMAN   | Hemoglobin subunit beta                      | 15            | 0.0257                                | 1.25                 | 0.0063                            | 1.61                |
| sp P06681 | C2       | CO2_HUMAN   | Complement C2                                | 2             | >0.05                                 | 0.29                 | 0.0002                            | 1.60                |
| sp P02760 | AMBP     | AMBP_HUMAN  | Protein AMBP                                 | 10            | 0.0007                                | 1.38                 | 0.0037                            | 1.60                |
| sp P02774 | GC       | VTDB_HUMAN  | Vitamin D-binding protein                    | 2             | 0.0036                                | -1.71                | 0.0102                            | 1.47                |
| sp P01042 | KNG1     | KNG1_HUMAN  | Kininogen-1                                  | 16            | 0.0176                                | 1.09                 | 0.0022                            | 1.44                |
| sp P0C0L5 | C4B      | CO4B_HUMAN  | Complement C4-B                              | 4             | 0.0231                                | 1.48                 | 0.0050                            | 1.42                |
| sp P00751 | CFB      | CFAB_HUMAN  | Complement factor B                          | 4             | 0.0002                                | -1.11                | 0.0129                            | 1.40                |
| sp P69905 | HBA1     | HBA_HUMAN   | Hemoglobin subunit alpha                     | 18            | 0.0251                                | 1.19                 | 0.0007                            | 1.39                |
| sp P02790 | HPX      | HEMO_HUMAN  | Hemopexin                                    | 45            | <0.0001                               | 1.46                 | 0.0041                            | 1.31                |
| sp Q14624 | ITIH4    | ITIH4_HUMAN | Inter-alpha-trypsin inhibitor heavy chain H4 | 40            | 0.0251                                | 1.17                 | 0.0068                            | 1.31                |
| sp P00734 | F2       | THRB_HUMAN  | Prothrombin                                  | 18            | 0.0442                                | 1.20                 | 0.0032                            | 1.30                |
| sp P01877 | IGHA2    | IGHA2_HUMAN | Immunoglobulin heavy constant alpha 2        | 3             | 0.0001                                | -1.14                | 0.0043                            | 1.26                |
| sp P02675 | FGB      | FIBB_HUMAN  | Fibrinogen beta chain                        | 37            | 0.0001                                | -1.38                | 0.0095                            | 1.25                |
| sp P06310 | IGKV2-30 | KV230_HUMAN | Immunoglobulin kappa variable 2-30           | 2             | 0.0003                                | -1.17                | >0.05                             | 1.24                |
| sp P00450 | CP       | CERU_HUMAN  | Ceruloplasmin                                | 82            | 0.0038                                | 1.37                 | 0.0019                            | 1.23                |
| sp P10909 | CLU      | CLUS_HUMAN  | Clusterin                                    | 8             | >0.05                                 | -0.33                | 0.0142                            | 1.19                |
| sp P01591 | JCHAIN   | IGJ_HUMAN   | Immunoglobulin J chain                       | 7             | 0.0001                                | -1.14                | 0.0123                            | 1.17                |
| sp P02671 | FGA      | FIBA_HUMAN  | Fibrinogen alpha chain                       | 32            | <0.0001                               | -1.30                | 0.0182                            | 1.17                |
| sp P01011 | SERPINA3 | AACT_HUMAN  | Alpha-1-antichymotrypsin                     | 24            | 0.0085                                | 1.25                 | 0.0059                            | 1.14                |
| sp P01031 | C5       | CO5_HUMAN   | Complement C5                                | 6             | 0.0165                                | 1.51                 | 0.0208                            | 1.12                |
| sp P02679 | FGG      | FIBG_HUMAN  | Fibrinogen gamma chain                       | 32            | <0.0001                               | -1.26                | 0.0254                            | 1.09                |
| sp P19827 | ITIH1    | ITIH1_HUMAN | Inter-alpha-trypsin inhibitor heavy chain H1 | 20            | 0.0169                                | 1.19                 | >0.05                             | 1.08                |
| sp P02765 | AHSG     | FETUA_HUMAN | N Alpha-2-HS-glycoprotein                    | 23            | >0.05                                 | 1.13                 | >0.05                             | 1.07                |
| sp P04196 | HRG      | HRG_HUMAN   | Histidine-rich glycoprotein                  | 13            | >0.05                                 | 1.13                 | >0.05                             | 1.07                |
| sp P05155 | SERPING1 | IC1_HUMAN   | Plasma protease C1 inhibitor                 | 15            | 0.0244                                | 1.25                 | >0.05                             | 1.05                |
| sp P19823 | ITIH2    | ITIH2_HUMAN | Inter-alpha-trypsin inhibitor heavy chain H2 | 22            | 0.0111                                | 1.17                 | >0.05                             | 1.03                |
| sp P00739 | HPR      | HPTR_HUMAN  | Haptoglobin-related protein                  | 2             | >0.05                                 | 0.46                 | >0.05                             | 0.46                |
| sp P19652 | ORM2     | A1AG2_HUMAN | Alpha-1-acid glycoprotein 2                  | 12            | 0.0334                                | 1.10                 | >0.05                             | 0.38                |
| sp P01876 | IGHA1    | IGHA1_HUMAN | Immunoglobulin heavy constant alpha 1        | 18            | 0.0004                                | -1.20                | >0.05                             | 0.35                |
| sp P01834 | IGKC     | IGKC_HUMAN  | Immunoglobulin kappa constant                | 9             | >0.05                                 | -0.32                | >0.05                             | 0.34                |
| sp P25311 | AZGP1    | ZA2G_HUMAN  | Zinc-alpha-2-glycoprotein                    | 2             | 0.0016                                | -1.42                | >0.05                             | -0.36               |
| sp O43866 | CD5L     | CD5L_HUMAN  | CD5 antigen-like                             | 2             | 0.0003                                | -1.13                | >0.05                             | -0.39               |
| sp P01008 | SERPINC1 | ANT3_HUMAN  | Antithrombin-III                             | 19            | 0.0001                                | -1.25                | <0.0001                           | -1.03               |
| sp P02743 | APCS     | SAMP_HUMAN  | Serum amyloid P-component                    | 6             | 0.0010                                | 1.11                 | <0.0001                           | -1.05               |

|           |          |             |                                                   |     |         |       |         |       |
|-----------|----------|-------------|---------------------------------------------------|-----|---------|-------|---------|-------|
| sp P0C0L4 | C4A      | CO4A_HUMAN  | Complement C4-A                                   | 5   | 0.0350  | 2.05  | <0.0001 | -1.06 |
| sp P22792 | CPN2     | CPN2_HUMAN  | Carboxypeptidase N subunit 2                      | 4   | 0.0009  | -1.17 | <0.0001 | -1.12 |
| sp P01861 | IGHG4    | IGHG4_HUMAN | Immunoglobulin heavy constant gamma 4             | 5   | 0.0023  | -1.58 | <0.0001 | -1.14 |
| sp P01024 | C3       | CO3_HUMAN   | Complement C3                                     | 128 | 0.0002  | 1.39  | <0.0001 | -1.17 |
| sp P04004 | VTN      | VTNC_HUMAN  | Vitronectin                                       | 7   | 0.0001  | -1.06 | <0.0001 | -1.18 |
| sp P01871 | IGHM     | IGHM_HUMAN  | Immunoglobulin heavy constant mu                  | 34  | 0.0001  | -1.25 | <0.0001 | -1.19 |
| sp P01860 | IGHG3    | IGHG3_HUMAN | Immunoglobulin heavy constant gamma 3             | 3   | 0.0002  | -1.61 | <0.0001 | -1.21 |
| sp P04114 | APOB     | APOB_HUMAN  | Apolipoprotein B-100                              | 12  | 0.0390  | 1.21  | <0.0001 | -1.25 |
| sp P04217 | A1BG     | A1BG_HUMAN  | Alpha-1B-glycoprotein                             | 9   | 0.0011  | -1.26 | <0.0001 | -1.30 |
| sp P01859 | IGHG2    | IGHG2_HUMAN | Immunoglobulin heavy constant gamma 2             | 6   | <0.0001 | -1.25 | <0.0001 | -1.31 |
| sp P02753 | RBP4     | RET4_HUMAN  | Retinol-binding protein 4                         | 2   | 0.0147  | 1.22  | <0.0001 | -1.33 |
| sp P01009 | SERPINA1 | A1AT_HUMAN  | Alpha-1-antitrypsin                               | 37  | >0.05   | 1.04  | <0.0001 | -1.35 |
| sp P06312 | IGKV4-1  | KV401_HUMAN | Immunoglobulin kappa variable 4-1                 | 2   | >0.05   | -0.41 | <0.0001 | -1.36 |
| sp P02766 | TTR      | TTHY_HUMAN  | Transthyretin                                     | 6   | >0.05   | 1.02  | <0.0001 | -1.37 |
| sp P01857 | IGHG1    | IGHG1_HUMAN | Immunoglobulin heavy constant gamma 1             | 9   | 0.0001  | -1.21 | <0.0001 | -1.43 |
| sp P08185 | SERPINA6 | CBG_HUMAN   | Corticosteroid-binding globulin                   | 4   | >0.05   | 0.30  | 0.001   | -1.43 |
| sp P01023 | A2M      | A2MG_HUMAN  | Alpha-2-macroglobulin                             | 168 | >0.05   | 0.33  | <0.0001 | -1.51 |
| sp P01019 | AGT      | ANGT_HUMAN  | Angiotensinogen                                   | 7   | 0.0008  | -1.29 | <0.0001 | -1.71 |
| sp P02787 | TF       | TRFE_HUMAN  | Serotransferrin                                   | 2   | 0.0002  | -1.28 | <0.0001 | -1.87 |
| sp P43652 | AFM      | AFAM_HUMAN  | Afamin                                            | 19  | 0.0001  | -1.24 | <0.0001 | -1.98 |
| sp P02751 | FN1      | FINC_HUMAN  | Fibronectin                                       | 5   | 0.0009  | -1.55 | <0.0001 | -2.05 |
| sp P35858 | IGFALS   | ALS_HUMAN   | Insulin-like growth factor-binding protein comple | 6   | 0.0001  | -1.23 | <0.0001 | -2.05 |
| sp P08697 | SERPINF2 | A2AP_HUMAN  | Alpha-2-antiplasmin                               | 4   | 0.0002  | -1.21 | <0.0001 | -2.53 |
| sp P02768 | ALB      | ALBU_HUMAN  | Serum albumin                                     | 63  | 0.0035  | -1.52 | <0.0001 | -2.66 |

Supplementary Table S4. N-linked glycosylated searched against 20 WGA-enriched glycoproteins of the pooled sample of healthy control, non-metastatic and metastatic CRC patient groups (criteria: DeltaMod > 20, Log Prob > 1.3 (p-value < 0.05) and MS/MS fragmentations containing modifications were found in at least 2 of 3 runs)

| Description                                                                          | N-glycosylation               | Healthy control |          | Non-metastatic CRC |          | Metastatic CRC |          |
|--------------------------------------------------------------------------------------|-------------------------------|-----------------|----------|--------------------|----------|----------------|----------|
|                                                                                      |                               | Delta Mod       | Log Prob | Delta Mod          | Log Prob | Delta Mod      | Log Prob |
| >sp P01023 A2MG_HUMAN Alpha-2-macroglobulin OS=Homo sapiens OX=9606 GN=A2M PE=1 SV=3 |                               |                 |          |                    |          |                |          |
| K.GCVLLSYLN <sup>55</sup> [+2204.772]ETVTVSASLESVR.G                                 | HexNAc(4)Hex(5)NeuAc(2)       | 48.33           | 4.00     | -                  | -        | -              | -        |
| K.GCVLLSYLN <sup>55</sup> [+2350.830]ETVTVSASLESVR.G                                 | HexNAc(4)Hex(5)Fuc(1)NeuAc(2) | 33.45           | 4.73     | -                  | -        | -              | -        |
| R.GN <sup>70</sup> [+2204.772]R.S                                                    | HexNAc(4)Hex(5)NeuAc(2)       | -               | -        | 116.01             | 2.17     | -              | -        |
| K.IITILEEEMN <sup>247</sup> [+2018.708]VSVCGLYTYGKVPVGHVTVSICR.K                     | HexNAc(3)Hex(6)Fuc(1)NeuAc(1) | -               | -        | 383.31             | 8.27     | -              | -        |
| K.IITILEEEMN <sup>247</sup> [+2262.814]VSVCGLYTYGKVPVGHVTVSICR.K                     | HexNAc(5)Hex(5)Fuc(1)NeuAc(1) | 102.42          | 3.35     | -                  | -        | -              | -        |
| K.VSN <sup>1424</sup> [+1913.677]QTLSLFFTVLQDVPVR.D                                  | HexNAc(4)Hex(5)NeuAc(1)       | 189.17          | 3.92     | 151.31             | 3.70     | -              | -        |
| K.VSN <sup>1424</sup> [+2059.735]QTLSLFFTVLQDVPVR.D                                  | HexNAc(4)Hex(5)Fuc(1)NeuAc(1) | 154.10          | 4.04     | 161.60             | 4.13     | -              | -        |
| K.VSN <sup>1424</sup> [+2226.754]QTLSLFFTVLQDVPVR.D                                  | HexNAc(4)Hex(5)NeuAc(2)Na(1)  | -               | -        | 81.68              | 3.07     | -              | -        |
| K.VSN <sup>1424</sup> [+2569.905]QTLSLFFTVLQDVPVR.D                                  | HexNAc(5)Hex(6)NeuAc(2)       | 40.34           | 2.76     | -                  | -        | -              | -        |
| >sp P00738 HPT_HUMAN Haptoglobin OS=Homo sapiens OX=9606 GN=HP PE=1 SV=1             |                               |                 |          |                    |          |                |          |
| K.MVSHHN <sup>184</sup> [+1913.677]LTTGATLINEQWLLTTAK.N                              | HexNAc(4)Hex(5)NeuAc(1)       | 145.40          | 3.62     | 156.52             | 2.96     | 200.20         | 2.60     |
| K.MVSHHN <sup>184</sup> [+2018.708]LTTGATLINEQWLLTTAK.N                              | HexNAc(3)Hex(6)Fuc(1)NeuAc(1) | 129.34          | 3.42     | 56.23              | 3.18     | 151.24         | 3.06     |
| K.MVSHHN <sup>184</sup> [+2204.772]LTTGATLINEQWLLTTAK.N                              | HexNAc(4)Hex(5)NeuAc(2)       | 23.91           | 3.15     | 46.94              | 2.54     | 20.55          | 2.70     |
| K.MVSHHN <sup>184</sup> [+2861.000]LTTGATLINEQWLLTTAK.N                              | HexNAc(5)Hex(6)NeuAc(3)       | -               | -        | 47.68              | 3.48     | -              | -        |
| K.VVLHPN <sup>241</sup> [+1913.677]YSQVDIGLIK.L                                      | HexNAc(4)Hex(5)NeuAc(1)       | 166.98          | 4.02     | 37.92              | 3.51     | 53.89          | 3.68     |
| K.VVLHPN <sup>241</sup> [+2204.772]YSQVDIGLIK.L                                      | HexNAc(4)Hex(5)NeuAc(2)       | 33.27           | 2.32     | 46.13              | 3.64     | 35.92          | 2.85     |
| K.VVLHPN <sup>241</sup> [+2226.754]YSQVDIGLIK.L                                      | HexNAc(4)Hex(5)NeuAc(2)Na(1)  | -               | -        | 98.82              | 2.95     | -              | -        |
| K.VVLHPN <sup>241</sup> [+2278.809]YSQVDIGLIK.L                                      | HexNAc(5)Hex(6)NeuAc(1)       | -               | -        | -                  | -        | 47.30          | 3.18     |

|                                                                                              |                         |        |      |        |      |        |      |
|----------------------------------------------------------------------------------------------|-------------------------|--------|------|--------|------|--------|------|
| >sp P02763 A1AG1_HUMAN Alpha-1-acid glycoprotein 1 OS=Homo sapiens OX=9606 GN=ORM1 PE=1 SV=1 |                         |        |      |        |      |        |      |
| R.NEEYN <sup>56</sup> [+2204.772]K.S                                                         | HexNAc(4)Hex(5)NeuAc(2) | 160.38 | 2.78 | 200.79 | 2.43 | 198.73 | 2.55 |
| R.QDQCIYN <sup>93</sup> [+2861.000]TTYLVNQQR.E                                               | HexNAc(5)Hex(6)NeuAc(3) | -      | -    | 59.58  | 3.50 | 21.86  | 2.19 |
| >sp P0C0L4 CO4A_HUMAN Complement C4-A OS=Homo sapiens OX=9606 GN=C4A PE=1 SV=2               |                         |        |      |        |      |        |      |
| R.GLN <sup>1328</sup> [+2204.772]VTLSSSTGR.N                                                 | HexNAc(4)Hex(5)NeuAc(2) | -      | -    | -      | -    | 185.59 | 3.48 |

Supplementary Table S5. Glycated peptides searched against 20 WGA-enriched glycoproteins of the pooled sample of healthy control, non-metastatic and metastatic CRC patient groups (criteria: DeltaMod > 20, Log Prob > 1.3 (p-value < 0.05) and MS/MS fragmentations containing modifications were found in at least 2 of 3 runs)

| Peptide sequence                                                                     | Modification | Healthy control |      | Non-metastatic CRC |      | Metastatic CRC |      |
|--------------------------------------------------------------------------------------|--------------|-----------------|------|--------------------|------|----------------|------|
|                                                                                      |              | Delta           | Log  | Delta              | Log  | Delta          | Log  |
|                                                                                      |              | Mod             | Prob | Mod                | Prob | Mod            | Prob |
| >sp P01023 A2MG_HUMAN Alpha-2-macroglobulin OS=Homo sapiens OX=9606 GN=A2M PE=1 SV=3 |              |                 |      |                    |      |                |      |
| R.AVDQSVLLMK <sup>608</sup> [+58.005]PDAELSASSVYNLLPEKDLTGFPGLNDQDNEDCINR.H          | CML          | 73.56           | 6.58 | 74.81              | 6.42 | 78.67          | 6.56 |
| K.DTVIK <sup>901</sup> [+58.005]PLLVEPEGLEKETTFFNSLLCPSGGGEVSEELSLK.L                | CML          | 22.30           | 2.69 | 126.19             | 5.80 | -              | -    |
| K.DTVIKPLLVEPEGLEK <sup>912</sup> [+58.005]JETTFFNSLLCPSGGGEVSEELSLK.L               | CML          | 83.46           | 2.73 | -                  | -    | -              | -    |

Note: CML= carboxymethyllysine
